# Supplementary material for: Bisphosphorylation of anhydrides – convenient access to bisphosphonates with a P–O–C–P motif
Source: Royal Society of Chemistry journal article supplement (doi:10.1039/d2cc01472f), 2022-01-01

# **Bisphosphorylation of Anhydrides - Convenient Access to Bisphosphonates with a P-O-C-P Motif**

Xin-Yue Zhang,<sup>a</sup> Qi-Wei Li,<sup>a</sup> Hui-Qi Yue,<sup>a</sup> Zi-Qian Wu,<sup>a</sup> Ji Li,<sup>a</sup> Ming Li,<sup>a</sup> Lu Lu,<sup>a</sup>  
Shang-Dong Yang<sup>b</sup> and Bin Yang,<sup>a,\*</sup>

<sup>a</sup> College of Chemistry and Chemical Engineering, Yantai University, Yantai, 264005,  
P. R. China.

<sup>b</sup> State Key Laboratory of Applied Organic Chemistry, Lanzhou University, Lanzhou  
730000, P. R. China.

*E-mail:* yangbin\_hy@ytu.edu.cn

## **Contents**

|                                                  |     |
|--------------------------------------------------|-----|
| 1. General Information.....                      | S2  |
| 2. Reaction Condition Optimization .....         | S2  |
| 3. General Procedure for Bisphosphorylation..... | S4  |
| 4. Application.....                              | S6  |
| 5. Mechanism Studies .....                       | S9  |
| 6. Characterization of the Products .....        | S10 |
| 7. Reference .....                               | S24 |
| 8. Charts of Compounds .....                     | S25 |

## 1. General information

$^1\text{H}$ ,  $^{13}\text{C}$  NMR,  $^{31}\text{P}$  NMR and  $^{19}\text{F}$  NMR spectra were recorded on a 500M Bruker AVANCE NEO spectrometer in  $\text{CDCl}_3$  with TMS as internal standard. High resolution mass spectroscopic (HRMS) and mass spectra were measured using Thermo Scientific DS II mass spectrometer, Thermo Q Exactive Focus and Bruker micro TOF-Q mass spectrometer. Thermo gravimetric analysis (TGA) of samples was carried out with Mettler TGA/DSC 3+ thermal analyzer from 25 °C to 800 °C at a heating rate of 10 °C /min. The starting materials were purchased from Aldrich, Acros Organics, J&K Chemicals or TCI and used without further purification. Solvents were dried and purified according to the procedure from “Purification of Laboratory Chemicals book”. Column chromatography was carried out on silica gel (particle size 200-400 mesh ASTM). Substrates of **2a-2c**, **2e**, **2f**, **2h**, **2j** were prepared according to literature procedure.<sup>[1-3]</sup>

## 2. Reaction Condition Optimization

### 2.1 Table S1. Condition Optimization of Using $\text{Ph}_2\text{P}(\text{O})\text{-H}$ as Substrate<sup>a</sup>

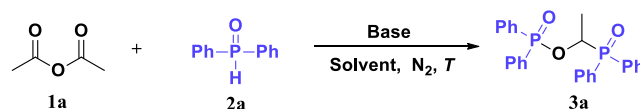

| Entry           | Base (equiv.)                  | 1a / 2a          | T (°C)    | Solvent        | Yield (%) |
|-----------------|--------------------------------|------------------|-----------|----------------|-----------|
| 1               | NaF(2.0)                       | 1.0 : 3.0        | 100       | MeCN           | 54        |
| 2               | NaF(2.0)                       | 1.0 : 3.0        | 100       | DCE            | 45        |
| 3               | NaF(2.0)                       | 1.0 : 3.0        | 100       | Toluene        | 63        |
| 4               | NaF(2.0)                       | 1.0 : 3.0        | 100       | THF            | 55        |
| 5               | NaF(2.0)                       | 1.0 : 3.0        | 100       | 1,4-dioxane    | 34        |
| 6               | NaF(2.0)                       | 1.0 : 3.0        | 100       | DMSO           | trace     |
| 7               | NaF(2.0)                       | 1.0 : 3.0        | 100       | DMF            | trace     |
| 8               | NaF(2.0)                       | 1.0 : 3.0        | 100       | DMAC           | trace     |
| 9               | NaF(2.0)                       | 1.0 : 3.0        | 100       | NMP            | trace     |
| 10              | NaF(0.2)                       | 1.0 : 3.0        | 100       | toluene        | 48        |
| 11              | pyridine(0.2)                  | 1.0 : 3.0        | 100       | toluene        | 46        |
| 12              | 2-chloropyridine (0.2)         | 1.0 : 3.0        | 100       | toluene        | 66        |
| 13              | 2-fluoropyridine (0.2)         | 1.0 : 3.0        | 100       | toluene        | 72        |
| 14              | 2,6-lutidine (0.2)             | 1.0 : 3.0        | 100       | toluene        | 65        |
| 15              | 2,6-dichloropyridine(0.2)      | 1.0 : 3.0        | 100       | toluene        | 73        |
| 16              | DBU(0.2)                       | 1.0 : 3.0        | 100       | toluene        | 57        |
| 17              | DABCO(0.2)                     | 1.0 : 3.0        | 100       | toluene        | 55        |
| 18              | DMAP(0.2)                      | 1.0 : 3.0        | 100       | toluene        | 74        |
| 19              | $\text{Na}_2\text{CO}_3$ (0.2) | 1.0 : 3.0        | 100       | toluene        | 54        |
| 20              | $\text{NaHCO}_3$ (0.2)         | 1.0 : 3.0        | 100       | toluene        | 71        |
| 21              | $\text{K}_3\text{PO}_4$ (0.2)  | 1.0 : 3.0        | 100       | toluene        | 51        |
| 22              | $\text{K}_2\text{HPO}_4$ (0.2) | 1.0 : 3.0        | 100       | toluene        | 40        |
| 23 <sup>b</sup> | DMAP(0.2)                      | 1.0 : 3.0        | 100       | toluene        | 66        |
| 24 <sup>c</sup> | DMAP(0.2)                      | 1.0 : 3.0        | 100       | toluene        | 61        |
| 25              | DMAP(0.2)                      | 1.0 : 2.5        | 100       | toluene        | 70        |
| 26              | DMAP(0.2)                      | 1.0 : 3.5        | 100       | toluene        | 75        |
| 27              | DMAP(0.2)                      | 1.0 : 3.0        | 110       | toluene        | 74        |
| <b>28</b>       | DMAP(0.2)                      | <b>1.0 : 3.0</b> | <b>90</b> | <b>toluene</b> | <b>83</b> |
| 29              | DMAP(0.2)                      | 1.0 : 3.0        | 80        | toluene        | 58        |
| 30              | DMAP(0.15)                     | 1.0 : 3.0        | 90        | toluene        | 67        |
| 31              | DMAP(0.25)                     | 1.0 : 3.0        | 90        | toluene        | 69        |
| 32 <sup>d</sup> | DMAP(0.2)                      | 1.0 : 3.0        | 90        | toluene        | 47        |
| 33              | —                              | 1.0 : 3.0        | 90        | toluene        | 10        |

<sup>a</sup> Reaction conditions: **1a** (0.2 mmol),  $\text{Ph}_2\text{P}(\text{O})\text{H}$  (121.2mg, 3.0 equiv.), Base (0.2 equiv.), Solvent (2.0 mL),  $\text{N}_2$ , 100 °C overnight, isolated yield; <sup>b</sup> toluene (1.5 mL); <sup>c</sup> toluene (2.5 mL); <sup>d</sup> Under air.

## 2.1 Table S2. Condition Optimization of Using (EtO)<sub>2</sub>P(O)-H as Substrate <sup>a</sup>

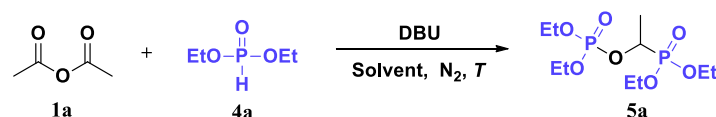

| Entry           | DBU (equiv.)                          | 1a / 2a          | T (°C)    | Solvent        | Yield (%) |
|-----------------|---------------------------------------|------------------|-----------|----------------|-----------|
| 1               | 1.5                                   | 1.0 : 3.0        | 90        | toluene        | 42        |
| 2               | 1.5                                   | 1.0 : 3.0        | 90        | DCE            | trace     |
| 3               | 1.5                                   | 1.0 : 3.0        | 90        | THF            | 26        |
| 4               | 1.5                                   | 1.0 : 3.0        | 90        | 1,4-dioxane    | 20        |
| 5               | 1.5                                   | 1.0 : 3.0        | 90        | DMSO           | trace     |
| 6               | 1.5                                   | 1.0 : 3.0        | 90        | DMF            | trace     |
| 7               | 1.5                                   | 1.0 : 3.0        | 90        | MeCN           | 17        |
| 8               | 1.5                                   | 1.0 : 3.0        | 60        | toluene        | 32        |
| <b>9</b>        | <b>1.5</b>                            | <b>1.0 : 3.0</b> | <b>70</b> | <b>toluene</b> | <b>60</b> |
| 10              | 1.5                                   | 1.0 : 3.0        | 80        | toluene        | 49        |
| 11              | 1.5                                   | 1.0 : 3.0        | 100       | toluene        | 34        |
| 12              | 1.5                                   | 1.0 : 2.5        | 70        | toluene        | 33        |
| 13              | 1.5                                   | 1.0 : 3.5        | 70        | toluene        | 36        |
| 14              | 0.5                                   | 1.0 : 3.0        | 70        | toluene        | 22        |
| 15              | 1.0                                   | 1.0 : 3.0        | 70        | toluene        | 43        |
| 16              | 2.0                                   | 1.0 : 3.0        | 70        | toluene        | 32        |
| 17              | 2.5                                   | 1.0 : 3.0        | 70        | toluene        | 33        |
| 18 <sup>b</sup> | 1.5                                   | 1.0 : 3.0        | 70        | toluene        | 33        |
| 19 <sup>c</sup> | 1.5                                   | 1.0 : 3.0        | 70        | toluene        | 35        |
| 20              | DMAP (1.5)                            | 1.0 : 3.0        | 70        | toluene        | trace     |
| 21              | pyridine(1.5)                         | 1.0 : 3.0        | 70        | toluene        | N.R       |
| 22              | DABCO(1.5)                            | 1.0 : 3.0        | 70        | toluene        | N.R       |
| 23              | Na <sub>2</sub> CO <sub>3</sub> (1.5) | 1.0 : 3.0        | 70        | toluene        | N.R       |
| 24              | NaHCO <sub>3</sub> (1.5)              | 1.0 : 3.0        | 70        | toluene        | N.R       |
| 25              | K <sub>3</sub> PO <sub>4</sub> (1.5)  | 1.0 : 3.0        | 70        | toluene        | N.R       |
| 26              | —                                     | 1.0 : 3.0        | 70        | toluene        | N.R       |

<sup>a</sup> Reaction conditions: **1a** (0.2 mmol), (EtO)<sub>2</sub>P(O)H (82.8 mg, 3.0 equiv.), DBU (1.5 equiv.), Solvent (2.0 mL), N<sub>2</sub>, stirred at 70 °C overnight, isolated yield; <sup>b</sup> toluene (1.5 mL); <sup>c</sup> toluene (2.5 mL).

## 2.3 Reaction Conditions:

### ➤ Condition A for R<sup>1</sup>R<sup>2</sup>P(O)-H

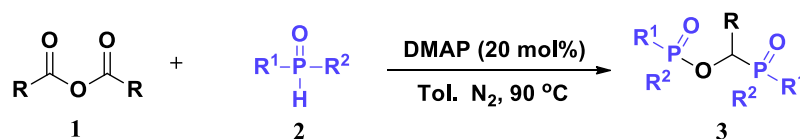

Condition A: **1** (0.2 mmol, 1.0 eq.), **2** (0.6 mmol, 3.0 eq.), DMAP (4.9 mg, 0.2 eq.), toluene (2.0 mL), N<sub>2</sub>, stirred at 90 °C overnight.

### ➤ Condition B for (RO)<sub>2</sub>P(O)-H

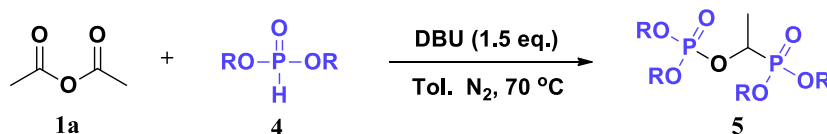

Condition B: **1a** (20.4 mg, 0.2 mmol, 1.0 eq.), **4** (0.6 mmol, 3.0 eq.), DBU (45.7 mg, 1.5 eq.), toluene (2.0 mL), N<sub>2</sub>, stirred at 70 °C overnight.

### 3. General Procedure for Bisphosphorylation

#### 3.1 General procedure for bis-phosphorylation with R<sup>1</sup>R<sup>2</sup>P(O)-H as substrate

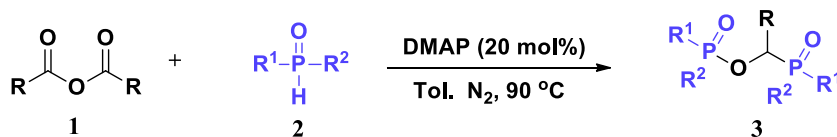

A mixture of **1** (0.2 mmol, 1.0 eq.), **2** (0.6 mmol, 3.0 eq.) and DMAP (4.9 mg, 20 mol%) was dissolved in toluene (2.0 mL) under N<sub>2</sub> atmosphere, stirred at 90 °C overnight. At the completion of the reaction, H<sub>2</sub>O (20 mL) was added. The aqueous phase was extracted with ethyl acetate (3 x 50 mL). The combined organic fractions washed with brine and dried over MgSO<sub>4</sub>. The solvent was removed by rotary evaporation. The resulting residue was purified by column chromatography on silica gel (dichloromethane / methanol = 100: 1) to afford the products **3**.

#### 3.2 General procedure for bis-phosphorylation with (RO)<sub>2</sub>P(O)-H as substrate

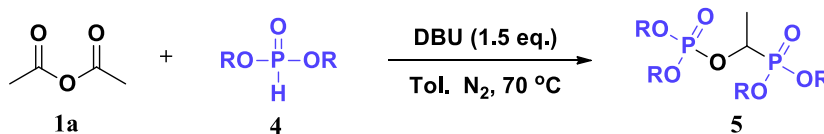

A mixture of **1a** (20.4 mg, 0.2 mmol, 1.0 eq.), **4** (0.6 mmol, 3.0 eq.) and DBU (45.7 mg, 1.5 eq.) was dissolved in toluene (2.0 mL) under N<sub>2</sub> atmosphere, stirred at 70 °C overnight. At the completion of the reaction, the solvent was removed by rotary evaporation. The resulting residue was purified by column chromatography on silica gel (petroleum ether/ethyl acetate = 2: 1, 300 mL, then dichloromethane / methanol = 30: 1) to afford the products **5**.

#### 3.3 General procedure for bis-phosphorylation with (PhO)<sub>2</sub>P(O)-H as substrate

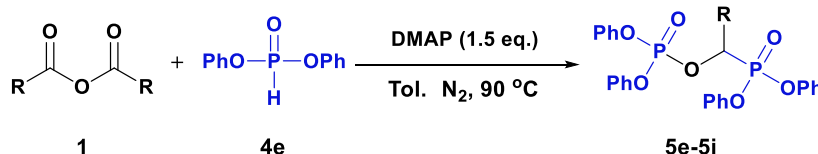

A mixture of **1** (0.2 mmol, 1.0 eq.), **4e** (140.4 mg, 0.6 mmol, 3.0 eq.), DMAP (36.7 mg, 0.3 mmol, 1.5 eq.) was dissolved in toluene (2.0 mL) under N<sub>2</sub> atmosphere, stirred at 90 °C overnight. At the completion of the reaction, the solvent was removed by rotary evaporation. The resulting residue was purified by column chromatography on silica gel (petroleum ether/ethyl acetate = 6: 1) to afford products **5e-5i**.

### 3.4 General procedure for bis-phosphorylation with RCO-Cl (**6a**, **6b**) as substrate

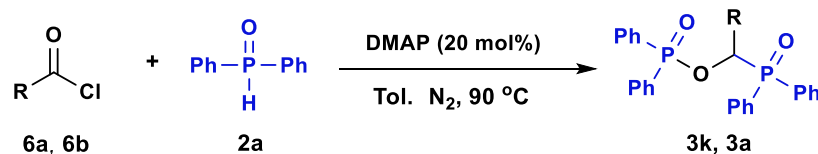

A mixture of **6a** (0.2 mmol, 28.1 mg, 1.0 eq.), or **6b** (0.2 mmol, 15.7 mg, 1.0 eq.), **2a** (0.6 mmol, 121.2 mg, 3.0 eq.) and DMAP (4.9 mg, 20 mol%) was dissolved in toluene (2.0 mL) under N<sub>2</sub> atmosphere, stirred at 90 °C overnight. At the completion of the reaction, H<sub>2</sub>O (20 mL) was added. The aqueous phase was extracted with ethyl acetate (3 x 50 mL). The combined organic fractions washed with brine and dried over MgSO<sub>4</sub>. The solvent was removed by rotary evaporation. The resulting residue was purified by column chromatography on silica gel (dichloromethane / methanol = 100: 1) to afford 72.2 mg of **3k** (0.142 mmol, 71%) or 29.4 mg of **3a** (0.066 mmol, 33%).

### 3.5 General procedure for bis-phosphorylation with RCOOEt (**6c**, **6d**) as substrate

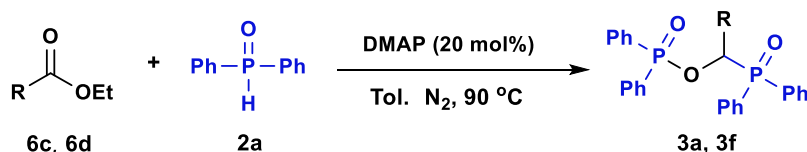

A mixture of **6c** (0.2 mmol, 17.6 mg, 1.0 eq.), or **6d** (0.2 mmol, 28.4 mg, 1.0 eq.), **2a** (0.6 mmol, 121.2 mg, 3.0 eq.) and DMAP (4.9 mg, 20 mol%) was dissolved in toluene (2.0 mL) under N<sub>2</sub> atmosphere, stirred at 90 °C overnight. At the completion of the reaction, H<sub>2</sub>O (20 mL) was added. The aqueous phase was extracted with ethyl acetate (3 x 50 mL). The combined organic fractions washed with brine and dried over MgSO<sub>4</sub>. The solvent was removed by rotary evaporation. The resulting residue was purified by column chromatography on silica gel (dichloromethane / methanol = 100: 1) to afford 0 mg of **3a** (0%) or 29.0 mg of **3f** (0.058 mmol, 29%).

### 3.6 General procedure for bis-phosphorylation with peroxides (**6e**, **6f**) as substrate

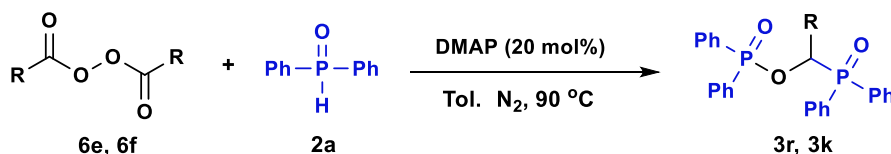

A mixture of **6e** (0.2 mmol, 79.7 mg, 1.0 eq.), or **6f** (0.2 mmol, 48.4 mg, 1.0 eq.), **2a** (0.6 mmol, 121.2 mg, 3.0 eq.) and DMAP (4.9 mg, 20 mol%) was dissolved in

toluene (2.0 mL) under N<sub>2</sub> atmosphere, stirred at 90 °C overnight. At the completion of the reaction, H<sub>2</sub>O (20 mL) was added. The aqueous phase was extracted with ethyl acetate (3 x 50 mL). The combined organic fractions washed with brine and dried over MgSO<sub>4</sub>. The solvent was removed by rotary evaporation. The resulting residue was purified by column chromatography on silica gel (dichloromethane / methanol = 100: 1) to afford 73.9 mg of **3r** (0.126 mmol, 63%) or 45.7 mg of **3k** (0.09 mmol, 45%).

## 4. Applications

### 4.1 Large-Scale Preparation and Byproduct Recovery

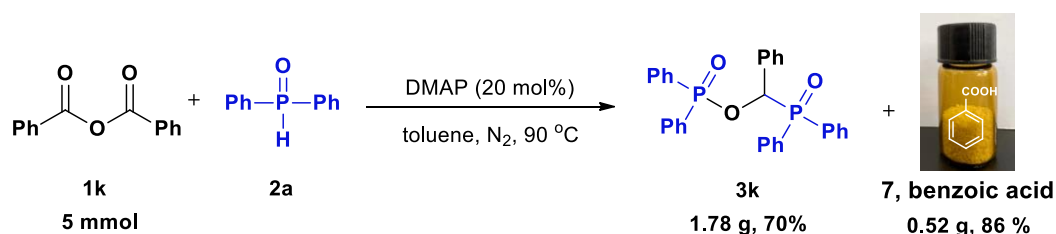

A mixture of **1k** (5 mmol, 1.13 g, 1.0 eq.), **2a** (15 mmol, 3.03 g, 3.0 eq.) and DMAP (122.2 mg, 20 mol%) was dissolved in toluene (45 mL) under N<sub>2</sub> atmosphere, stirred at 90 °C overnight. At the completion of the reaction, 50 mL of sat. aq. NaHCO<sub>3</sub> was added. The aqueous phase was extracted with ethyl acetate (3 x 100 mL). The combined organic fractions washed with brine and dried over MgSO<sub>4</sub>. The solvent was removed by rotary evaporation. The resulting residue was purified by column chromatography on silica gel (dichloromethane / methanol = 100: 1) to afford 1.78g (3.5 mmol) of **3k** in 70% yield. Next, the conc. HCl was added to the aqueous phase until the pH = 1. After that, the white solid was dissolved by ethyl acetate (100 mL) and the aqueous phase was extracted with ethyl acetate (3 x 50 mL). The combined organic fractions dried over MgSO<sub>4</sub> and the solvent was removed by rotary evaporation. The resulting residue was purified by column chromatography on silica gel (petroleum ether/ethyl acetate = 1: 2 with 1% AcOH) to afford 0.52g (4.3 mmol) of benzoic acid (**7**) in 86% yield.

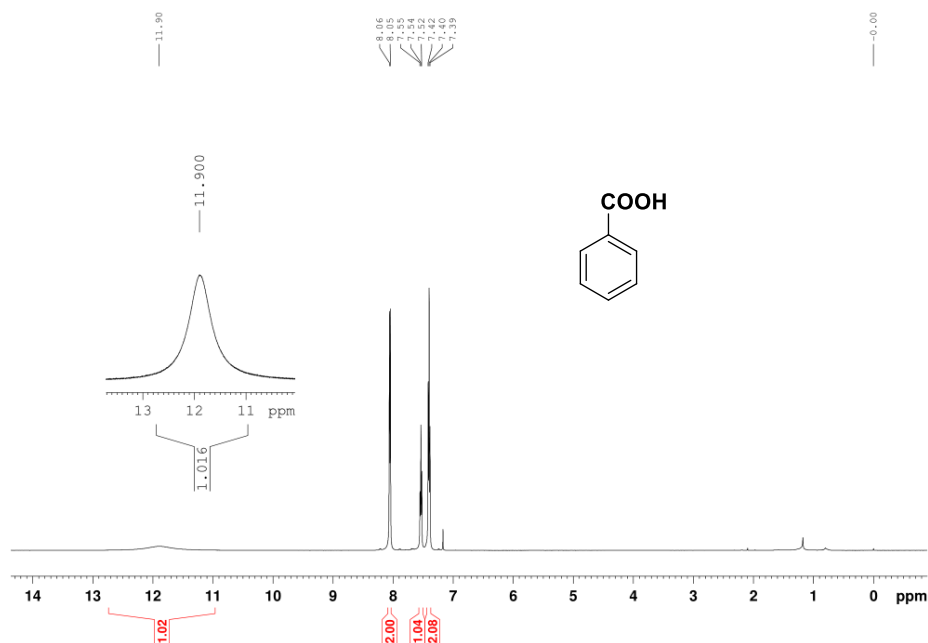

$^1\text{H}$  NMR of benzoic acid **7**

#### 4.2 Further transformations of **5h**

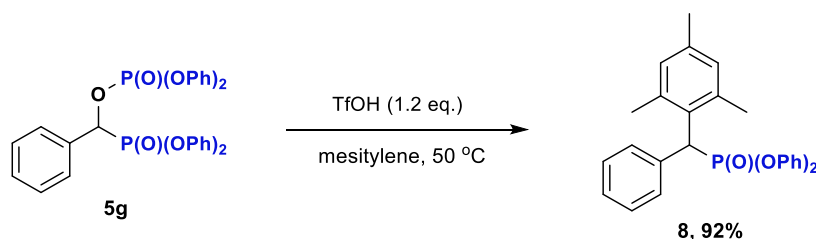

A mixture of **5g** (0.2 mmol, 114.4 mg, 1.0 eq.), TfOH (0.24 mmol, 36.0 mg, 1.2 eq.) was dissolved in mesitylene (0.3 mL), stirred at 50 °C overnight. At the completion of the reaction, the reaction was quenched with water, and the required compounds were extracted with EtOAc (3 × 25 mL). The combined organic layer was washed with brine, dried with  $\text{Na}_2\text{SO}_4$ , and then evaporated under reduced pressure. The residue was purified by flash column chromatography on silica gel (petroleum ether/ethyl acetate = 8 : 1) to afford the compound **8** in 92% yield (81.3 mg, 0.18 mmol).

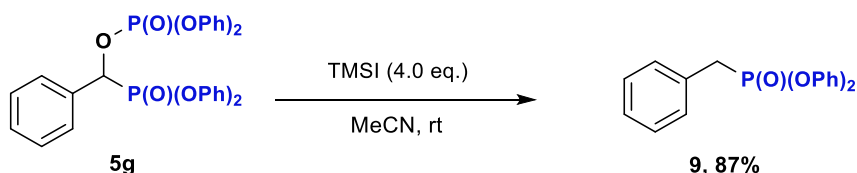

A mixture of **5h** (0.2 mmol, 114.4 mg, 1.0 eq.), TMSI (iodotrimethylsilane) (0.8 mmol, 160.1 mg, 4.0 eq.) was dissolved in MeCN (2.0 mL), stirred at room

temperature for 20 min. At the completion of the reaction, the solvent was removed by rotary evaporation. The resulting residue was purified by column chromatography on silica gel (petroleum ether/ethyl acetate = 5 : 1) to afford the compound **9** in 87% yield (56.4 mg, 0.17 mmol).

#### 4.3 Thermal analysis of DOPO and selected bisphosphorylation samples.

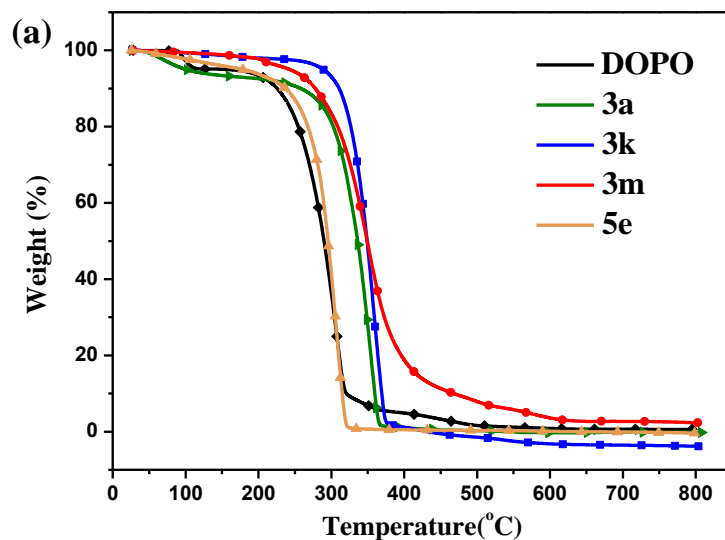

Figure. S1. TGA Curves of DOPO and **3a**, **3k**, **3m** and **5e**

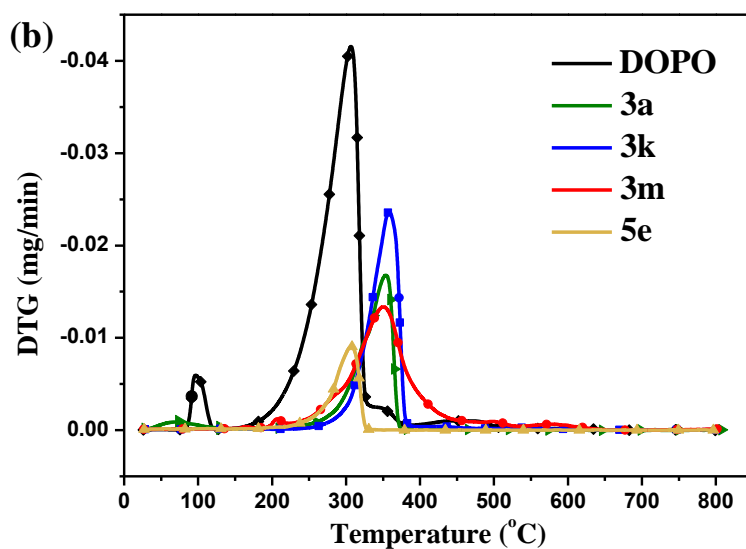

Figure. S2. DTG Curves of DOPO and **3a**, **3k**, **3m** and **5e**



**Table S3.** TGA and DTG data of DOPO, **3a**, **3k**, **3m** and **5e**

| Sample    | $T_{-5\text{wt}\%}$ (°C) | $T_{-50\text{wt}\%}$ (°C) | $T_{\text{max}}$ (°C) |
|-----------|--------------------------|---------------------------|-----------------------|
| DOPO      | 155.2                    | 289.9                     | 306.6                 |
| <b>3a</b> | 100.3                    | 336.0                     | 353.8                 |
| <b>3k</b> | 289.0                    | 349.0                     | 358.1                 |
| <b>3m</b> | 242.7                    | 349.1                     | 350.2                 |
| <b>5e</b> | 178.5                    | 295.5                     | 307.0                 |

## 5. Mechanism studies

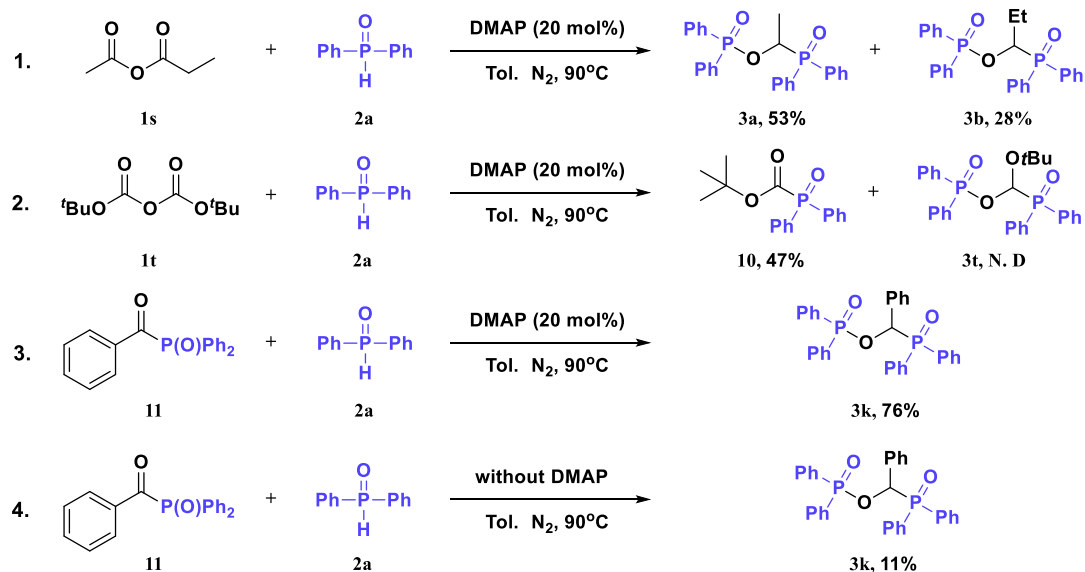**Scheme S1.** Control experiments.<sup>a</sup>

Several control experiments were carried out to deduce key information about the reaction pathway (Scheme S1). When a mixed acid anhydride, acetic propionic anhydride (**1s**) was used as a substrate, we obtained the bisphosphorylation products **3a** and **3b** in a 53% and a 28% yield, respectively (Scheme S1-1). Moreover, by using di-*tert*-butyl dicarbonate (**1t**) as substrate, we only obtained acylphosphine oxide (**10**) instead of the bisphosphorylation product (**3t**) (Scheme S1-2). These results indicate that steric hindrance has an obvious effect and the reaction of anhydride with large steric hindrance may terminate in the first step to give acylphosphine oxide as the intermediate. To verify the above hypothesis, we employed compound **11** as the substrate (Scheme S1-3), and it could be smoothly converted into the desired bisphosphorylation product (**3k**) under the standard conditions. Without adding DMAP, the yield of **3k** dropped sharply (Scheme S1-4),

which indicate that DMAP also play an important role to promote the addition of **2a** to **11**.

<sup>a</sup> Compound **11** was prepared according to the literature: *Org. Lett.* **2020**, *22*, 4633–4637.

**Scheme S2.** Possible Mechanism for the DBU-promoted bisphosphorylation of anhydride with phosphite.

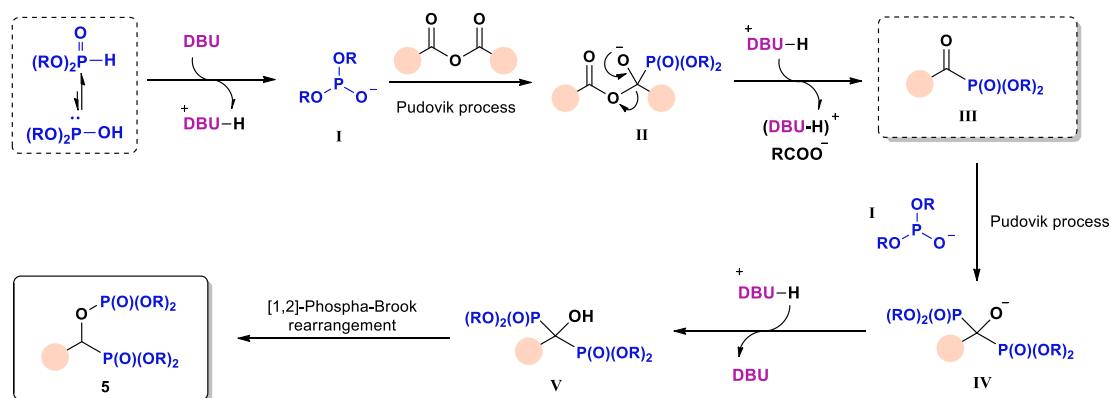

## 6. Characterization of the Products

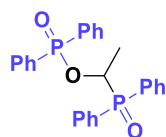

**1-(diphenylphosphoryl)ethyl diphenylphosphinate.** Performed according to the general procedure (conditions A, 20.4 mg of **1a**, 121.2 mg of **2a** and 4.9 mg of DMAP), and purified by column chromatography (dichloromethane / methanol = 100: 1) to afford 74.0 mg (0.166 mmol, 83%) of **3a** as colorless oil: <sup>1</sup>H NMR (500 MHz, CDCl<sub>3</sub>): δ 7.97-7.93 (m, 2H), 7.80-7.76 (m, 2H), 7.71-7.66 (m, 2H), 7.56-7.39 (m, 10H), 7.30-7.22 (m, 4H), 5.48-5.41 (m, 1H), 1.53 (dd, *J* = 7.0 Hz, 14.6 Hz, 3H). <sup>13</sup>C NMR (125 MHz, CDCl<sub>3</sub>): δ 132.4 (d, *J*<sub>C-P</sub> = 2.6 Hz), 132.3, 132.2 (d, *J*<sub>C-P</sub> = 8.9 Hz), 132.1 (d, *J*<sub>C-P</sub> = 2.7 Hz), 131.6 (d, *J*<sub>C-P</sub> = 4.4 Hz), 131.5 (d, *J*<sub>C-P</sub> = 3.3Hz), 131.2 (d, *J*<sub>C-P</sub> = 10.5 Hz), 130.7 (d, *J*<sub>C-P</sub> = 132.2 Hz), 130.5 (d, *J*<sub>C-P</sub> = 105.0 Hz), 128.7 (d, *J*<sub>C-P</sub> = 11.6 Hz), 128.5 (d, *J*<sub>C-P</sub> = 5.9 Hz), 128.4 (d, *J*<sub>C-P</sub> = 7.4 Hz), 128.3 (d, *J*<sub>C-P</sub> = 13.3Hz), 127.9, 70.0 (dd, *J*<sub>1</sub> = 7.7 Hz, *J*<sub>2</sub> = 89.1 Hz), 15.9. <sup>31</sup>P NMR (203 MHz, CDCl<sub>3</sub>): δ 33.91 (d, *J* = 26.8 Hz), 31.19 (d, *J* = 25.2 Hz). MS (ESI): 446.7 (M+H)<sup>+</sup>.

The analytical data matched those reported in the literature.<sup>[4]</sup>

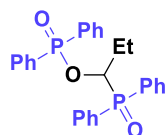

**1-(diphenylphosphoryl)propyl diphenylphosphinate.** Performed according to the general procedure (conditions A, 26.0 mg of **1b**, 121.2 mg of **2a** and 4.9 mg of DMAP), and purified by column chromatography (dichloromethane / methanol = 100: 1) to afford 67.2 mg (0.146 mmol, 73%) of **3b** as colorless oil: <sup>1</sup>H NMR (500 MHz, CDCl<sub>3</sub>): δ 7.95-7.92 (m, 2H), 7.79-7.75 (m, 2H), 7.72-7.68 (m, 2H), 7.51-7.48 (m, 2H), 7.46-7.35 (m, 8H), 7.30-7.26 (m, 2H), 7.22-7.18 (m, 2H), 5.43-5.38 (m, 1H),

2.03-1.93 (m, 2H), 0.85 (t,  $J = 7.5$  Hz, 3H).  $^{13}\text{C}$  NMR (125 MHz,  $\text{CDCl}_3$ ):  $\delta$  132.8, 132.2 (d,  $J_{\text{C-P}} = 2.7$  Hz), 132.1 (d,  $J_{\text{C-P}} = 2.3$  Hz), 132.0 (d,  $J_{\text{C-P}} = 8.8$  Hz), 131.7 (d,  $J_{\text{C-P}} = 2.7$  Hz), 131.6 (d,  $J_{\text{C-P}} = 5.0$  Hz), 131.4 (d,  $J_{\text{C-P}} = 1.7$  Hz), 131.3, 131.1 (d,  $J_{\text{C-P}} = 10.4$  Hz), 130.9, 130.0 (d,  $J_{\text{C-P}} = 142.7$  Hz), 128.7, 128.6, 128.4 (d,  $J_{\text{C-P}} = 3.0$  Hz), 128.3 (d,  $J_{\text{C-P}} = 1.4$  Hz), 128.51 (d,  $J_{\text{C-P}} = 13.1$  Hz), 75.1 (dd,  $J_1 = 8.3$  Hz,  $J_2 = 87.2$  Hz), 24.1, 10.7 (d,  $J_{\text{C-P}} = 7.8$  Hz).  $^{31}\text{P}$  NMR (203 MHz,  $\text{CDCl}_3$ ):  $\delta$  33.73 (d,  $J = 22.1$  Hz), 30.38 (d,  $J = 21.9$  Hz). HRMS calc. for  $\text{C}_{27}\text{H}_{27}\text{O}_3\text{P}_2$  (M+H) $^+$ : 461.1430, found 461.1426.

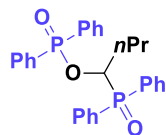

**1-(diphenylphosphoryl)butyl diphenylphosphinate** Performed according to the general procedure (conditions A, 31.6 mg of **1c**, 121.2 mg of **2a** and 4.9 mg of DMAP), and purified by column chromatography (dichloromethane / methanol = 100: 1) to afford 68.3 mg (0.144 mmol, 72%) of **3c** as colorless oil:  $^1\text{H}$  NMR (500 MHz,  $\text{CDCl}_3$ ):  $\delta$  7.95-7.91 (m, 2H), 7.78-7.74 (m, 2H), 7.71-7.67 (m, 2H), 7.51-7.48 (m, 2H), 7.46-7.35 (m, 8H), 7.30-7.26 (m, 2H), 7.22-7.18 (m, 2H), 5.49-5.44 (m, 1H), 1.92-1.85 (m, 2H), 1.36-1.21 (m, 2H), 0.66 (t,  $J = 7.4$  Hz, 3H).  $^{13}\text{C}$  NMR (125 MHz,  $\text{CDCl}_3$ ):  $\delta$  132.8, 132.2 (d,  $J_{\text{C-P}} = 2.6$  Hz), 132.1 (d,  $J_{\text{C-P}} = 5.3$  Hz), 132.0 (d,  $J_{\text{C-P}} = 8.9$  Hz), 131.7 (d,  $J_{\text{C-P}} = 2.9$  Hz), 131.4, 131.3 (d,  $J_{\text{C-P}} = 2.5$  Hz), 131.2 (d,  $J_{\text{C-P}} = 96.9$  Hz), 131.1 (d,  $J_{\text{C-P}} = 10.7$  Hz), 130.0 (d,  $J_{\text{C-P}} = 155.4$  Hz), 128.7 (d,  $J_{\text{C-P}} = 11.6$  Hz), 128.4 (d,  $J_{\text{C-P}} = 13.0$  Hz), 128.2 (d,  $J_{\text{C-P}} = 13.5$  Hz), 73.7 (dd,  $J_1 = 8.3$  Hz,  $J_2 = 87.5$  Hz), 32.7, 19.3 (d,  $J_{\text{C-P}} = 8.1$  Hz), 13.6.  $^{31}\text{P}$  NMR (203 MHz,  $\text{CDCl}_3$ ):  $\delta$  33.62 (d,  $J = 20.2$  Hz), 30.6 (d,  $J = 21.0$  Hz). HRMS calc. for  $\text{C}_{28}\text{H}_{29}\text{O}_3\text{P}_2$  (M+H) $^+$ : 475.1586, found 475.1583.

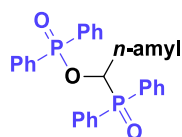

**1-(diphenylphosphoryl)hexyl diphenylphosphinate** Performed according to the general procedure (conditions A, 42.9 mg of **1d**, 121.2 mg of **2a** and 4.9 mg of DMAP), and purified by column chromatography (dichloromethane / methanol = 100: 1) to afford 61.2 mg (0.122 mmol, 61%) of **3d** as colorless oil:  $^1\text{H}$  NMR (500 MHz,  $\text{CDCl}_3$ ):  $\delta$  7.96-7.92 (m, 2H), 7.79-7.68 (m, 4H), 7.50-7.47 (m, 2H), 7.45-7.34 (m, 8H), 7.30-7.26 (m, 2H), 7.21-7.17 (m, 2H), 5.50-5.45 (m, 1H), 1.92-1.85 (m, 2H), 1.27-1.18 (m, 2H), 1.05-0.94 (m, 4H), 0.67 (t,  $J = 6.8$  Hz, 3H).  $^{13}\text{C}$  NMR (125 MHz,  $\text{CDCl}_3$ ):  $\delta$  132.9, 132.1 (d,  $J_{\text{C-P}} = 2.7$  Hz), 132.1 (d,  $J_{\text{C-P}} = 3.3$  Hz), 132.0 (d,  $J_{\text{C-P}} = 8.9$  Hz), 131.8, 131.7 (d,  $J_{\text{C-P}} = 2.7$  Hz), 131.4 (d,  $J_{\text{C-P}} = 5.8$  Hz), 131.3 (d,  $J_{\text{C-P}} = 4.6$  Hz), 131.2 (d,  $J_{\text{C-P}} = 96.7$  Hz), 130.1 (d,  $J_{\text{C-P}} = 161.7$  Hz), 128.6 (d,  $J_{\text{C-P}} = 11.4$  Hz), 128.5, 128.4 (d,  $J_{\text{C-P}} = 12.6$  Hz), 128.1 (d,  $J_{\text{C-P}} = 13.5$  Hz), 73.8 (dd,  $J_1 = 8.4$  Hz,  $J_2 = 87.5$  Hz), 31.2, 30.5, 25.5 (d,  $J_{\text{C-P}} = 8.0$  Hz), 22.0, 13.7.  $^{31}\text{P}$  NMR (203 MHz,  $\text{CDCl}_3$ ):  $\delta$  33.55 (d,  $J = 20.1$  Hz), 30.5 (d,  $J = 20.1$  Hz). HRMS calc. for  $\text{C}_{30}\text{H}_{33}\text{O}_3\text{P}_2$  (M+H) $^+$ : 503.1899, found 503.1895.

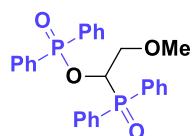

**(diphenylphosphoryl)(methoxy)methyl diphenylphosphinate**. Performed according to the general procedure (conditions A, 32.4 mg of **1e**, 121.2 mg of **2a** and 4.9 mg of DMAP), and purified by column chromatography (dichloromethane / methanol = 100: 1) to afford 71.4 mg (0.15 mmol, 75%) of **3e** as

colorless oil:  $^1\text{H}$  NMR (500 MHz,  $\text{CDCl}_3$ ):  $\delta$  7.95-7.91 (m, 2H), 7.84-7.80 (m, 2H), 7.74-7.69 (m, 2H), 7.54-7.36 (m, 10H), 7.29-7.24 (m, 2H), 7.22-7.18 (m, 2H), 5.68-5.63 (m, 1H), 3.82-3.78 (m, 1H), 3.73-3.68 (m, 1H), 2.86 (s, 3H).  $^{13}\text{C}$  NMR (125 MHz,  $\text{CDCl}_3$ ):  $\delta$  132.6, 132.3 (d,  $J_{\text{C-P}} = 2.6$  Hz), 132.2 (d,  $J_{\text{C-P}} = 2.6$  Hz), 132.1, 132.0 (d,  $J_{\text{C-P}} = 9.3$  Hz), 131.7 (d,  $J_{\text{C-P}} = 2.7$  Hz), 131.5, 131.4 (d,  $J_{\text{C-P}} = 10.2$  Hz), 131.3 (d,  $J_{\text{C-P}} = 9.2$  Hz), 131.0 (d,  $J_{\text{C-P}} = 10.3$  Hz), 129.7 (d,  $J_{\text{C-P}} = 97.1$  Hz), 128.7 (d,  $J_{\text{C-P}} = 11.8$  Hz), 128.6, 128.4 (d,  $J_{\text{C-P}} = 12.0$  Hz), 128.1 (d,  $J_{\text{C-P}} = 9.9$  Hz), 128.0 (d,  $J_{\text{C-P}} = 9.6$  Hz), 72.6 (dd,  $J_1 = 8.4$  Hz,  $J_2 = 86.2$  Hz), 70.6 (d,  $J_{\text{C-P}} = 6.7$  Hz), 58.0.  $^{31}\text{P}$  NMR (203 MHz,  $\text{CDCl}_3$ ):  $\delta$  34.93 (d,  $J = 20.3$  Hz), 28.74 (d,  $J = 20.3$  Hz). HRMS calc. for  $\text{C}_{27}\text{H}_{27}\text{O}_4\text{P}_2$  (M+H) $^+$ : 477.1379, found 477.1375.

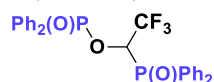

**1-(diphenylphosphoryl)-2,2,2-trifluoroethyl diphenylphosphinate.** Performed according to the general procedure (conditions A at 120°C instead, 42.0 mg of **1f**, 121.2 mg of **2a** and 4.9 mg of DMAP), and purified by column chromatography (dichloromethane / methanol = 100: 1) to afford 52.0 mg (0.104 mmol, 52%) of **3f** as white solid:  $^1\text{H}$  NMR (500 MHz,  $\text{CDCl}_3$ ):  $\delta$  7.92-7.83 (m, 4H), 7.74-7.70 (m, 2H), 7.55-7.50 (m, 2H), 7.46-7.32 (m, 8H), 7.30-7.26 (m, 2H), 7.22-7.19 (m, 2H), 6.01-5.93 (m, 1H).  $^{13}\text{C}$  NMR (125 MHz,  $\text{CDCl}_3$ ):  $\delta$  132.8 (d,  $J_{\text{C-P}} = 2.7$  Hz), 132.7 (dd,  $J_{\text{C-F}} = 2.7$  Hz,  $J_{\text{C-P}} = 11.1$  Hz), 132.1, 132.0 (d,  $J_{\text{C-P}} = 9.3$  Hz), 131.5 (d,  $J_{\text{C-P}} = 9.7$  Hz), 131.3 (d,  $J_{\text{C-P}} = 10.6$  Hz), 131.1, 130.8 (d,  $J_{\text{C-P}} = 10.9$  Hz), 130.0 (d,  $J_{\text{C-P}} = 3.6$  Hz), 129.2 (d,  $J_{\text{C-P}} = 103.1$  Hz), 128.8 (d,  $J_{\text{C-P}} = 12.5$  Hz), 128.5 (d,  $J_{\text{C-P}} = 7.7$  Hz), 128.4 (d,  $J_{\text{C-P}} = 8.9$  Hz), 128.2 (d,  $J_{\text{C-P}} = 13.7$  Hz), 127.5 (d,  $J_{\text{C-P}} = 104.7$  Hz), 69.9 (qd,  $J_1 = 7.7$  Hz,  $J_2 = 32.1$  Hz).  $^{31}\text{P}$  NMR (203 MHz,  $\text{CDCl}_3$ ):  $\delta$  38.32 (d,  $J = 10.7$  Hz), 24.93 (d,  $J = 12.0$  Hz).  $^{19}\text{F}$  NMR (470 MHz,  $\text{CDCl}_3$ ):  $\delta$  -66.72 (d,  $J_{\text{P-F}} = 3.1$  Hz). MS (ESI): 500.9 (M+H) $^+$ .

The analytical data matched those reported in the literature.<sup>[5]</sup>

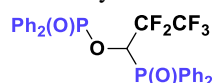

**1-(diphenylphosphoryl)-2,2,3,3,3-pentafluoropropyl diphenylphosphinate.** Performed according to the general procedure (conditions A at 120°C instead, 121.2 mg of **1g**, 60.6 mg of **2a** and 4.9 mg of DMAP), and purified by column chromatography (dichloromethane / methanol = 100: 1) to afford 50.6 mg (0.092 mmol, 46%) of **3g** as white solid:  $^1\text{H}$  NMR (500 MHz,  $\text{CDCl}_3$ ):  $\delta$  7.91-7.81 (m, 4H), 7.73-7.69 (m, 2H), 7.50-7.47 (m, 2H), 7.41-7.33 (m, 8H), 7.30-7.27 (m, 2H), 7.22-7.19 (m, 2H), 6.18-6.10 (m, 1H).  $^{13}\text{C}$  NMR (125 MHz,  $\text{CDCl}_3$ ):  $\delta$  132.6 (dd,  $J_{\text{C-F}} = 2.9$  Hz,  $J_{\text{C-P}} = 5.9$  Hz), 132.4 (d,  $J_{\text{C-P}} = 2.7$  Hz), 131.9 (d,  $J_{\text{C-P}} = 9.0$  Hz), 131.8, 131.7 (d,  $J_{\text{C-P}} = 12.0$  Hz), 131.4 (d,  $J_{\text{C-P}} = 9.6$  Hz), 131.3, 131.0 (d,  $J_{\text{C-P}} = 10.7$  Hz), 130.7 (d,  $J_{\text{C-P}} = 10.3$  Hz), 130.4 (d,  $J_{\text{C-P}} = 47.0$  Hz), 129.5 (d,  $J_{\text{C-P}} = 103.0$  Hz), 128.7 (d,  $J_{\text{C-P}} = 12.6$  Hz), 128.4 (d,  $J_{\text{C-P}} = 7.2$  Hz), 128.3 (d,  $J_{\text{C-P}} = 8.4$  Hz), 128.2 (d,  $J_{\text{C-P}} = 13.6$  Hz), 127.6 (d,  $J_{\text{C-P}} = 104.1$  Hz), 70.3-69.2 (m).  $^{31}\text{P}$  NMR (203 MHz,  $\text{CDCl}_3$ ):  $\delta$  37.48 (d,  $J = 7.5$  Hz), 24.80.  $^{19}\text{F}$  NMR (470 MHz,  $\text{CDCl}_3$ ):  $\delta$  -81.13, -113.82 (ddd,  $J_1 = 7.1$  Hz,  $J_2 = 282.7$  Hz,  $J_3 = 1036.7$  Hz). MS (ESI): 550.9 (M+H) $^+$ .

The analytical data matched those reported in the literature.<sup>[6]</sup>

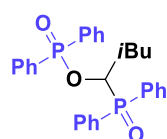

**1-(diphenylphosphoryl)-3-methylbutyl diphenylphosphinate.** Performed according to the general procedure (conditions A, 37.3 mg of **1h**, 121.2 mg of **2a** and 4.9 mg of DMAP), and purified by column chromatography (dichloromethane / methanol = 100: 1) to afford 69.3 mg (0.142 mmol, 71%)

of **3h** as white solid:  $^1\text{H}$  NMR (500 MHz,  $\text{CDCl}_3$ ):  $\delta$  7.95-7.91 (m, 2H), 7.80-7.76 (m, 2H), 7.72-7.67 (m, 2H), 7.50-7.46 (m, 2H), 7.42-7.28 (m, 10H), 7.21-7.17 (m, 2H), 5.56-5.52 (m, 1H), 1.93-1.85 (m, 1H), 1.67-1.60 (m, 1H), 1.53-1.46 (m, 1H), 0.73 (d,  $J = 6.5$  Hz, 3H), 0.63 (d,  $J = 6.6$  Hz, 3H).  $^{13}\text{C}$  NMR (125 MHz,  $\text{CDCl}_3$ ):  $\delta$  133.0, 132.1, 132.0 (d,  $J_{\text{C-P}} = 2.8$  Hz), 132.0 (d,  $J_{\text{C-P}} = 8.6$  Hz), 131.6 (d,  $J_{\text{C-P}} = 2.7$  Hz), 131.4 (d,  $J_{\text{C-P}} = 5.7$  Hz), 131.3 (d,  $J_{\text{C-P}} = 6.8$  Hz), 131.2 (d,  $J_{\text{C-P}} = 130.3$  Hz), 131.0 (d,  $J_{\text{C-P}} = 10.4$  Hz), 129.9 (d,  $J_{\text{C-P}} = 169.7$  Hz), 128.6 (d,  $J_{\text{C-P}} = 11.4$  Hz), 128.4, 128.3 (d,  $J_{\text{C-P}} = 12.4$  Hz), 128.1 (d,  $J_{\text{C-P}} = 13.2$  Hz), 72.3 (dd,  $J_1 = 8.6$  Hz,  $J_2 = 87.5$  Hz), 39.3, 24.6 (d,  $J_{\text{C-P}} = 9.2$  Hz), 22.8, 21.2.  $^{31}\text{P}$  NMR (203 MHz,  $\text{CDCl}_3$ ):  $\delta$  33.42 (d,  $J = 17.8$  Hz), 31.11 (d,  $J = 20.1$  Hz). MS (ESI): 488.9 (M+H) $^+$ .

The analytical data matched those reported in the literature.<sup>[7]</sup>

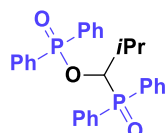

**1-(diphenylphosphoryl)-2-methylpropyl diphenylphosphinate** Performed according to the general procedure (conditions A, 31.6 mg of **1i**, 121.2 mg of **2a** and 4.9 mg of DMAP), and purified by column chromatography (dichloromethane / methanol = 100: 1) to afford 37.9 mg (0.08 mmol, 40%) of **3i** as colorless oil:  $^1\text{H}$  NMR (500 MHz,  $\text{CDCl}_3$ ):  $\delta$  7.91-7.87 (m, 2H), 7.83-7.73 (m, 4H), 7.49-7.47 (m, 2H), 7.43-7.39 (m, 4H), 7.35-7.23 (m, 6H), 7.17-7.14 (m, 2H), 5.54 (dd,  $J_1 = 2.7$  Hz,  $J_2 = 11.6$  Hz, 1H), 2.34-2.26 (m, 1H), 1.00 (d,  $J = 6.9$  Hz, 3H), 0.85 (d,  $J = 6.9$  Hz, 3H).  $^{13}\text{C}$  NMR (125 MHz,  $\text{CDCl}_3$ ):  $\delta$  133.3, 132.3 (d,  $J_{\text{C-P}} = 7.3$  Hz), 132.2, 132.1 (d,  $J_{\text{C-P}} = 2.7$  Hz), 132.0, 131.9 (d,  $J_{\text{C-P}} = 8.9$  Hz), 131.8 (d,  $J_{\text{C-P}} = 2.7$  Hz), 131.4 (d,  $J_{\text{C-P}} = 2.7$  Hz), 131.3 (d,  $J_{\text{C-P}} = 49.9$  Hz), 131.2 (d,  $J_{\text{C-P}} = 10.1$  Hz), 131.1 (d,  $J_{\text{C-P}} = 9.0$  Hz), 130.9 (d,  $J_{\text{C-P}} = 10.6$  Hz), 130.0 (d,  $J_{\text{C-P}} = 97.7$  Hz), 128.7 (d,  $J_{\text{C-P}} = 11.5$  Hz), 128.4 (d,  $J_{\text{C-P}} = 13.4$  Hz), 128.2 (d,  $J_{\text{C-P}} = 11.6$  Hz), 128.0 (d,  $J_{\text{C-P}} = 13.4$  Hz), 77.9 (dd,  $J_1 = 8.6$  Hz,  $J_2 = 85.3$  Hz), 30.0, 21.2 (d,  $J_{\text{C-P}} = 10.7$  Hz), 17.5 (d,  $J_{\text{C-P}} = 1.4$  Hz).  $^{31}\text{P}$  NMR (203 MHz,  $\text{CDCl}_3$ ):  $\delta$  33.50 (d,  $J = 16.8$  Hz), 28.63 (d,  $J = 17.0$  Hz). HRMS calc. for  $\text{C}_{28}\text{H}_{29}\text{O}_3\text{P}_2$  (M+H) $^+$ : 475.1586, found 475.1587.

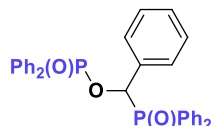

**(diphenylphosphoryl)(phenyl)methyl diphenylphosphinate**. Performed according to the general procedure (conditions A, 45.2 mg of **1k**, 121.2 mg of **2a** and 4.9 mg of DMAP), and purified by column chromatography (dichloromethane / methanol = 100: 1) to afford 75.2 mg (0.148 mmol, 74%) of **3k** as white solid:  $^1\text{H}$  NMR (500 MHz,  $\text{CDCl}_3$ ):  $\delta$  8.03-7.99 (m, 2H), 7.62-7.59 (m, 2H), 7.54-7.51 (m, 1H), 7.47-7.39 (m, 6H), 7.36-7.22 (m, 7H), 7.17-7.07 (m, 5H), 7.01 (t,  $J = 7.7$  Hz, 2H), 6.32 (dd,  $J_1 = 2.6$  Hz,  $J_2 = 10.4$  Hz, 1H).  $^{13}\text{C}$  NMR (125 MHz,  $\text{CDCl}_3$ ):  $\delta$  133.5 (d,  $J_{\text{C-P}} = 8.5$  Hz), 132.4, 132.3 (d,  $J_{\text{C-P}} = 2.5$  Hz), 132.1 (d,  $J_{\text{C-P}} = 6.9$  Hz), 131.9 (d,  $J_{\text{C-P}} = 2.9$  Hz), 131.7 (d,  $J_{\text{C-P}} = 10.8$  Hz), 131.6 (d,  $J_{\text{C-P}} = 9.1$  Hz), 131.2 (d,  $J_{\text{C-P}} = 10.7$  Hz), 131.0 (d,  $J_{\text{C-P}} = 81.6$  Hz), 130.2 (d,  $J_{\text{C-P}} = 7.9$  Hz), 129.5 (d,  $J_{\text{C-P}} = 107.1$  Hz), 129.2 (d,  $J_{\text{C-P}} = 4.7$  Hz), 128.6, 128.5, 128.4 (d,  $J_{\text{C-P}} = 3.0$  Hz), 128.3 (d,  $J_{\text{C-P}} = 6.5$  Hz), 128.0 (d,  $J_{\text{C-P}} = 31.1$  Hz), 127.8 (d,  $J_{\text{C-P}} = 6.9$  Hz), 74.7 (dd,  $J_1 = 7.6$  Hz,  $J_2 = 85.6$  Hz).  $^{31}\text{P}$  NMR (203 MHz,  $\text{CDCl}_3$ ):  $\delta$  33.43 (d,  $J = 25.0$  Hz), 28.93 (d,  $J = 23.5$  Hz). MS (ESI): 508.9 (M+H) $^+$ .

The analytical data matched those reported in the literature.<sup>[8]</sup>

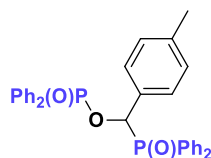

**(diphenylphosphoryl)(p-tolyl)methyl diphenylphosphinate.** Performed according to the general procedure (conditions A, 50.9 mg of **11**, 121.2 mg of **2a** and 4.9 mg of DMAP), and purified by column chromatography (dichloromethane / methanol = 100: 1) to afford 83.5 mg (0.160 mmol, 80%) of **31** as white solid:  $^1\text{H}$  NMR (500 MHz,  $\text{CDCl}_3$ ):  $\delta$  8.02-7.98 (m, 2H), 7.64-7.60 (m, 2H), 7.54-7.51 (m, 1H), 7.47-7.38 (m, 6H), 7.35-7.29 (m, 5H), 7.27-7.22 (m, 2H), 7.16-7.12 (m, 2H), 7.06 (d,  $J = 7.1$  Hz, 2H), 6.82 (d,  $J = 7.9$  Hz, 2H), 6.27 (dd,  $J_1 = 2.3$  Hz,  $J_2 = 10.2$  Hz, 1H), 2.18 (s, 3H).  $^{13}\text{C}$  NMR (125 MHz,  $\text{CDCl}_3$ ):  $\delta$  138.4 (d,  $J_{\text{C-P}} = 1.7$  Hz), 132.4 (d,  $J_{\text{C-P}} = 8.6$  Hz), 132.2 (d,  $J_{\text{C-P}} = 2.5$  Hz), 132.0 (d,  $J_{\text{C-P}} = 6.4$  Hz), 131.7 (d,  $J_{\text{C-P}} = 3.3$  Hz), 131.6 (d,  $J_{\text{C-P}} = 4.6$  Hz), 131.5, 131.4 (d,  $J_{\text{C-P}} = 8.7$  Hz), 131.2 (d,  $J_{\text{C-P}} = 10.7$  Hz), 130.4 (d,  $J_{\text{C-P}} = 98.9$  Hz), 130.3 (d,  $J_{\text{C-P}} = 2.2$  Hz), 129.3, 129.1 (d,  $J_{\text{C-P}} = 4.9$  Hz), 128.4 (d,  $J_{\text{C-P}} = 11.8$  Hz), 128.2 (d,  $J_{\text{C-P}} = 8.6$  Hz), 128.1, 127.8 (d,  $J_{\text{C-P}} = 13.4$  Hz), 74.7 (dd,  $J_1 = 7.6$  Hz,  $J_2 = 86.6$  Hz), 21.1.  $^{31}\text{P}$  NMR (203 MHz,  $\text{CDCl}_3$ ):  $\delta$  35.24 (d,  $J = 25.2$  Hz), 28.84 (d,  $J = 25.2$  Hz). HRMS calc. for  $\text{C}_{32}\text{H}_{29}\text{O}_3\text{P}_2$  ( $\text{M}+\text{H}$ ) $^+$ : 523.1586, found 523.1585.

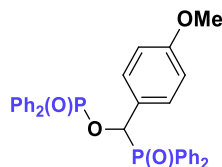

**(diphenylphosphoryl)(4-methoxyphenyl)methyl diphenylphosphinate.** Performed according to the general procedure (conditions A, 57.3 mg of **1m**, 121.2 mg of **2a** and 4.9 mg of DMAP), and purified by column chromatography (dichloromethane / methanol = 100: 1) to afford 82.9 mg (0.154 mmol, 77%) of **3m** as white solid:  $^1\text{H}$  NMR (500 MHz,  $\text{CDCl}_3$ ):  $\delta$  8.03-7.99 (m, 2H), 7.62-7.52 (m, 3H), 7.49-7.37 (m, 6H), 7.34-7.29 (m, 5H), 7.27-7.22 (m, 2H), 7.17-7.12 (m, 4H), 6.56 (d,  $J = 8.7$  Hz, 2H), 6.26 (dd,  $J_1 = 1.9$  Hz,  $J_2 = 10.1$  Hz, 1H), 3.69 (s, 3H).  $^{13}\text{C}$  NMR (125 MHz,  $\text{CDCl}_3$ ):  $\delta$  159.8 (d,  $J_{\text{C-P}} = 1.6$  Hz), 132.4 (d,  $J_{\text{C-P}} = 8.9$  Hz), 132.2 (d,  $J_{\text{C-P}} = 2.6$  Hz), 132.0 (d,  $J_{\text{C-P}} = 6.1$  Hz), 131.8 (d,  $J_{\text{C-P}} = 2.8$  Hz), 131.7 (d,  $J_{\text{C-P}} = 10.6$  Hz), 131.6 (d,  $J_{\text{C-P}} = 9.0$  Hz), 131.5, 131.2 (d,  $J_{\text{C-P}} = 10.8$  Hz), 131.1 (d,  $J_{\text{C-P}} = 67.5$  Hz), 130.8 (d,  $J_{\text{C-P}} = 5.2$  Hz), 130.4 (d,  $J_{\text{C-P}} = 3.7$  Hz), 129.7 (d,  $J_{\text{C-P}} = 102.1$  Hz), 128.5 (d,  $J_{\text{C-P}} = 11.6$  Hz), 128.4 (d,  $J_{\text{C-P}} = 11.8$  Hz), 128.2 (d,  $J_{\text{C-P}} = 13.5$  Hz), 127.8 (d,  $J_{\text{C-P}} = 13.4$  Hz), 124.4, 113.3, 74.4 (dd,  $J_1 = 7.6$  Hz,  $J_2 = 87.7$  Hz), 55.1.  $^{31}\text{P}$  NMR (203 MHz,  $\text{CDCl}_3$ ):  $\delta$  35.21 (d,  $J = 25.5$  Hz), 28.89 (d,  $J = 25.3$  Hz). HRMS calc. for  $\text{C}_{32}\text{H}_{29}\text{O}_4\text{P}_2$  ( $\text{M}+\text{H}$ ) $^+$ : 539.1536, found 539.1531.

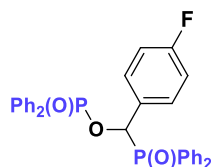

**(diphenylphosphoryl)(4-fluorophenyl)methyl diphenylphosphinate.** Performed according to the general procedure (conditions A, 52.4 mg of **1n**, 121.2 mg of **2a** and 4.9 mg of DMAP), and purified by column chromatography (dichloromethane / methanol = 100: 1) to afford 80.0 mg (0.152 mmol, 76%) of **3n** as white solid:  $^1\text{H}$  NMR (500 MHz,  $\text{CDCl}_3$ ):  $\delta$  8.03-7.99 (m, 2H), 7.62-7.54 (m, 3H), 7.50-7.38 (m, 6H), 7.35-7.30 (m, 5H), 7.28-7.24 (m, 2H), 7.18-7.15 (m, 4H), 6.70 (t,  $J = 8.7$  Hz, 2H), 6.30 (dd,  $J_1 = 2.2$  Hz,  $J_2 = 10.1$  Hz, 1H).  $^{13}\text{C}$  NMR (125 MHz,  $\text{CDCl}_3$ ):  $\delta$  162.7 (dd,  $J_{\text{C-P}} = 1.8$  Hz,  $J_{\text{C-F}} = 246.7$  Hz),

132.4, 132.3 (d,  $J_{C-P} = 3.6$  Hz), 132.2 (d,  $J_{C-P} = 2.6$  Hz), 132.1 (d,  $J_{C-P} = 2.7$  Hz), 132.0 (d,  $J_{C-P} = 2.7$  Hz), 131.6 (d,  $J_{C-P} = 10.6$  Hz), 131.5 (d,  $J_{C-P} = 9.0$  Hz), 131.2 (d,  $J_{C-P} = 10.7$  Hz), 131.1 (d,  $J_{C-P} = 8.1$  Hz), 130.8 (d,  $J_{C-P} = 69.0$  Hz), 130.1 (d,  $J_{C-P} = 9.3$  Hz), 129.3 (d,  $J_{C-P} = 102.5$  Hz), 128.6, 128.5 (d,  $J_{C-P} = 2.6$  Hz), 128.4, 128.2 (d,  $J_{C-P} = 13.6$  Hz), 128.1, 127.9 (d,  $J_{C-P} = 13.1$  Hz), 114.7 (d,  $J_{C-F} = 21.0$  Hz), 73.8 (dd,  $J_1 = 7.7$  Hz,  $J_2 = 86.2$  Hz).  $^{31}\text{P}$  NMR (203 MHz,  $\text{CDCl}_3$ ):  $\delta$  35.51 (d,  $J = 25.0$  Hz), 28.85 (d,  $J = 25.1$  Hz).  $^{19}\text{F}$  NMR (470 MHz,  $\text{CDCl}_3$ ):  $\delta$  -112.54 (d,  $J_{P-F} = 2.8$  Hz). HRMS calc. for  $\text{C}_{31}\text{H}_{26}\text{FO}_3\text{P}_2$  ( $\text{M}+\text{H}$ ) $^+$ : 527.1336, found 527.1335.

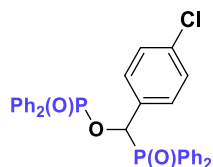

**(4-chlorophenyl)(diphenylphosphoryl)methyl diphenylphosphinate.** Performed according to the general procedure (conditions A, 59.0 mg of **1o**, 121.2 mg of **2a** and 4.9 mg of DMAP), and purified by column chromatography (dichloromethane / methanol = 100: 1) to afford 87.8 mg (0.162 mmol, 81%) of **3o** as white solid:  $^1\text{H}$  NMR (500 MHz,  $\text{CDCl}_3$ ):  $\delta$  8.01-7.98 (m, 2H), 7.63-7.54 (m, 3H), 7.49-7.31 (m, 11H), 7.28-7.24 (m, 2H), 7.20-7.16 (m, 2H), 7.10-7.08 (m, 2H), 6.99 (d,  $J = 8.4$  Hz, 2H), 6.28 (dd,  $J_1 = 2.7$  Hz,  $J_2 = 10.1$  Hz, 1H).  $^{13}\text{C}$  NMR (125 MHz,  $\text{CDCl}_3$ ):  $\delta$  134.6 (d,  $J_{C-P} = 2.3$  Hz), 132.4 (d,  $J_{C-P} = 2.8$  Hz), 132.3, 132.2 (d,  $J_{C-P} = 3.3$  Hz), 132.2 (d,  $J_{C-P} = 2.7$  Hz), 132.0 (d,  $J_{C-P} = 2.7$  Hz), 131.6 (d,  $J_{C-P} = 10.8$  Hz), 131.5 (d,  $J_{C-P} = 9.1$  Hz), 131.1 (d,  $J_{C-P} = 10.8$  Hz), 131.0, 130.6 (d,  $J_{C-P} = 80.9$  Hz), 130.4 (d,  $J_{C-P} = 4.9$  Hz), 129.9 (d,  $J_{C-P} = 16.4$  Hz), 129.1 (d,  $J_{C-P} = 104.8$  Hz), 128.5 (d,  $J_{C-P} = 8.7$  Hz), 128.4 (d,  $J_{C-P} = 8.7$  Hz), 128.2 (d,  $J_{C-P} = 13.5$  Hz), 128.0, 127.9, 73.9 (dd,  $J_1 = 7.6$  Hz,  $J_2 = 85.1$  Hz).  $^{31}\text{P}$  NMR (203 MHz,  $\text{CDCl}_3$ ):  $\delta$  35.68 (d,  $J = 23.8$  Hz), 28.82 (d,  $J = 24.8$  Hz). HRMS calc. for  $\text{C}_{31}\text{H}_{26}\text{ClO}_3\text{P}_2$  ( $\text{M}+\text{H}$ ) $^+$ : 543.1040, found 543.1040.

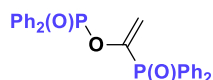

**1-(diphenylphosphoryl)vinyl diphenylphosphinate.** Performed according to the general procedure (conditions A, 34.2 mg of **1p**, 121.2 mg of **2a** and 4.9 mg of DMAP), and purified by column chromatography (dichloromethane / methanol = 100: 1) to afford 51.5 mg (0.116 mmol, 58%) of **3p** as white solid:  $^1\text{H}$  NMR (500 MHz,  $\text{CDCl}_3$ ):  $\delta$  7.79-7.74 (m, 4H), 7.61-7.58 (m, 2H), 7.54-7.45 (m, 10H), 7.37-7.33 (m, 4H), 6.05 (ddd,  $J_1 = 1.0$  Hz,  $J_2 = 3.3$  Hz,  $J_3 = 28.3$  Hz), 5.70 (ddd,  $J_1 = 1.5$  Hz,  $J_2 = 3.2$  Hz,  $J_3 = 9.9$  Hz).  $^{13}\text{C}$  NMR (125 MHz,  $\text{CDCl}_3$ ):  $\delta$  150.1 (dd,  $J_1 = 12.1$  Hz,  $J_2 = 127.4$  Hz), 132.5 (dd,  $J_1 = 2.7$  Hz,  $J_2 = 10.9$  Hz), 132.1 (d,  $J_{C-P} = 10.2$  Hz), 131.5 (d,  $J_{C-P} = 10.8$  Hz), 130.4 (d,  $J_{C-P} = 26.2$  Hz), 129.4 (d,  $J_{C-P} = 3.6$  Hz), 128.6 (d,  $J_{C-P} = 7.2$  Hz), 128.5 (d,  $J_{C-P} = 8.3$  Hz), 113.7 (dd,  $J_1 = 6.2$  Hz,  $J_2 = 18.1$  Hz).  $^{31}\text{P}$  NMR (203 MHz,  $\text{CDCl}_3$ ):  $\delta$  32.22 (d,  $J = 16.8$  Hz), 22.34 (d,  $J = 17.3$  Hz). HRMS calc. for  $\text{C}_{26}\text{H}_{23}\text{O}_3\text{P}_2$  ( $\text{M}+\text{H}$ ) $^+$ : 445.1117, found 445.1114.

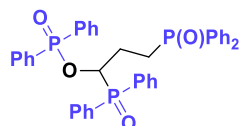

**1,3-bis(diphenylphosphoryl)propyl diphenylphosphinate.** Performed according to the general procedure (conditions A, 25.2 mg of **1q**, 121.2 mg of **2a** and 4.9 mg of DMAP), and purified by column chromatography (dichloromethane / methanol = 100: 1) to afford 21.1 mg (0.032 mmol, 16%) of **3q** as colorless oil:  $^1\text{H}$  NMR (500 MHz,  $\text{CDCl}_3$ ):  $\delta$  8.86-7.82 (m, 2H), 7.73-7.68 (m, 4H), 7.52-7.44

(m, 8H), 7.41-7.27 (m, 14H), 7.21-7.17 (m, 2H), 5.57-5.53 (m, 1H), 2.53-2.46 (m, 1H), 2.42-2.33 (m, 1H), 2.25-2.18 (m, 2H).  $^{13}\text{C}$  NMR (125 MHz,  $\text{CDCl}_3$ ):  $\delta$  132.9, 132.5 (d,  $J_{\text{C-P}} = 4.2$  Hz), 132.3 (td,  $J_1 = 2.6$  Hz,  $J_2 = 10.4$  Hz), 132.1, 131.9 (d,  $J_{\text{C-P}} = 2.8$  Hz), 131.8 (d,  $J_{\text{C-P}} = 9.0$  Hz), 131.6 (d,  $J_{\text{C-P}} = 31.9$  Hz), 131.6 (t,  $J_{\text{C-P}} = 2.5$  Hz), 131.4, 131.3, 131.2, 131.0 (d,  $J_{\text{C-P}} = 10.3$  Hz), 130.7, 130.6, 130.5, 130.4 (d,  $J_{\text{C-P}} = 62.9$  Hz), 129.4 (d,  $J_{\text{C-P}} = 106.2$  Hz), 128.8, 128.7 (d,  $J_{\text{C-P}} = 3.9$  Hz), 128.6, 128.5 (d,  $J_{\text{C-P}} = 11.8$  Hz), 128.3 (d,  $J_{\text{C-P}} = 13.5$  Hz), 128.2, 73.6 (ddd,  $J_1 = 8.3$  Hz,  $J_2 = 15.4$  Hz,  $J_3 = 86.0$  Hz), 26.0 (dd,  $J_1 = 7.2$  Hz,  $J_2 = 71.0$  Hz), 23.1.  $^{31}\text{P}$  NMR (203 MHz,  $\text{CDCl}_3$ ):  $\delta$  34.43 (d,  $J = 19.4$  Hz), 31.9, 30.5 (d,  $J = 18.0$  Hz). HRMS calc. for  $\text{C}_{39}\text{H}_{36}\text{O}_4\text{P}_3$  ( $\text{M}+\text{H}$ ) $^+$ : 661.1821, found 661.1816.

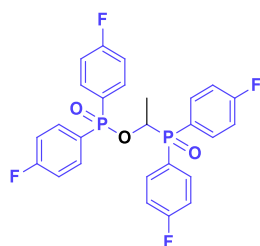

**1-(bis(4-fluorophenyl)phosphoryl)ethyl bis(4-fluorophenyl)phosphinate.** Performed according to the general procedure (conditions A, 20.4 mg of **1a**, 142.8 mg of bis(4-fluorophenyl)phosphine oxide **2b** and 4.9 mg of DMAP), and purified by column chromatography (dichloromethane / methanol = 100:1) to afford 90.1 mg (0.174 mmol, 87%) of **3aa** as colorless oil:  $^1\text{H}$  NMR (500 MHz,  $\text{CDCl}_3$ ):  $\delta$  7.93-7.88 (m, 2H), 7.81-7.69 (m, 4H), 7.35-7.30 (m, 2H), 7.19-7.12 (m, 6H), 7.01-6.97 (m, 2H), 5.52-5.46 (m, 1H), 1.49 (dd,  $J_1 = 7.0$  Hz,  $J_2 = 14.6$  Hz, 3H).  $^{13}\text{C}$  NMR (125 MHz,  $\text{CDCl}_3$ ):  $\delta$  165.4 (dd,  $J_1 = 1.9$  Hz,  $J_2 = 252.9$  Hz), 165.2 (ddd,  $J_1 = 3.2$  Hz,  $J_2 = 25.0$  Hz,  $J_3 = 253.4$  Hz), 134.5, 134.4, 134.3, 134.1 (d,  $J_{\text{C-P}} = 8.8$  Hz), 134.0 (d,  $J_{\text{C-P}} = 8.9$  Hz), 133.9 (d,  $J_{\text{C-P}} = 4.7$  Hz), 133.8, 133.6 (d,  $J_{\text{C-P}} = 9.0$  Hz), 133.5 (d,  $J_{\text{C-P}} = 9.0$  Hz), 127.6 (dd,  $J_1 = 3.2$  Hz,  $J_2 = 112.4$  Hz), 126.7 (dd,  $J_1 = 3.4$  Hz,  $J_2 = 74.1$  Hz), 125.8 (dd,  $J_1 = 3.4$  Hz,  $J_2 = 58.7$  Hz), 124.1 (dd,  $J_1 = 3.5$  Hz,  $J_2 = 102.4$  Hz), 116.4 (d,  $J_{\text{C-P}} = 12.7$  Hz), 116.3, 116.2, 116.1 (d,  $J_{\text{C-P}} = 12.7$  Hz), 116.0 (d,  $J_{\text{C-P}} = 3.3$  Hz), 115.9 (d,  $J_{\text{C-P}} = 4.0$  Hz), 115.8 (d,  $J_{\text{C-P}} = 6.5$  Hz), 115.6, 69.7 (dd,  $J_1 = 7.8$  Hz,  $J_2 = 90.1$  Hz), 15.7.  $^{31}\text{P}$  NMR (203 MHz,  $\text{CDCl}_3$ ):  $\delta$  32.42 (d,  $J = 23.3$  Hz), 29.69 (d,  $J = 23.2$  Hz).  $^{19}\text{F}$  NMR (470 MHz,  $\text{CDCl}_3$ ):  $\delta$  -105.0 (d,  $J = 118.7$  Hz), -105.3 (d,  $J = 123.1$  Hz). HRMS calc. for  $\text{C}_{26}\text{H}_{21}\text{F}_4\text{O}_3\text{P}_2$  ( $\text{M}+\text{H}$ ) $^+$ : 519.0897, found 519.0892.

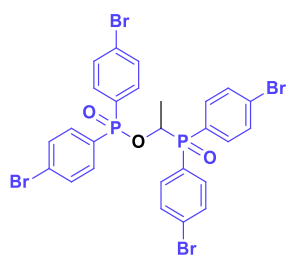

**1-(bis(4-bromophenyl)phosphoryl)ethyl bis(4-bromophenyl)phosphinate.** Performed according to the general procedure (conditions A, 20.4 mg of **1a**, 214.7 mg of bis(4-bromophenyl)phosphine oxide **2c** and 4.9 mg of DMAP), and purified by column chromatography (dichloromethane / methanol = 100:1) to afford 144.8 mg (0.19 mmol, 95%) of **3ab** as colorless oil:  $^1\text{H}$  NMR (500 MHz,  $\text{CDCl}_3$ ):  $\delta$  7.73-7.69 (m, 2H), 7.63-7.52 (m, 10H), 7.45-7.43 (m, 2H), 7.16-7.12 (m, 2H), 5.52-5.46 (m, 1H), 1.50 (dd,  $J_1 = 7.0$  Hz,  $J_2 = 14.7$  Hz, 3H).  $^{13}\text{C}$  NMR (125 MHz,  $\text{CDCl}_3$ ):  $\delta$  133.3 (d,  $J_{\text{C-P}} = 9.3$  Hz), 132.7 (t,  $J_{\text{C-P}} = 9.3$  Hz), 132.4, 132.2 (d,  $J_{\text{C-P}} = 2.4$  Hz), 132.1 (d,  $J_{\text{C-P}} = 4.8$  Hz), 132.0, 131.9 (d,  $J_{\text{C-P}} = 13.7$  Hz), 131.7, 130.3 (d,  $J_{\text{C-P}} = 131.5$  Hz), 129.5 (d,  $J_{\text{C-P}} = 81.3$  Hz), 128.5 (d,  $J_{\text{C-P}} = 45.5$  Hz), 128.2 (d,  $J_{\text{C-P}} = 3.5$  Hz), 128.1 (dd,  $J_1 = 3.7$  Hz,  $J_2 = 34.9$  Hz), 128.0, 127.1 (d,  $J_{\text{C-P}} = 100.2$  Hz), 69.6 (dd,  $J_1 = 7.7$  Hz,



$J_2 = 89.4$  Hz), 15.8.  $^{31}\text{P}$  NMR (203 MHz,  $\text{CDCl}_3$ ):  $\delta$  32.86 (d,  $J = 22.6$  Hz), 29.79 (d,  $J = 22.6$  Hz). HRMS calc. for  $\text{C}_{26}\text{H}_{21}\text{Br}_4\text{O}_3\text{P}_2$  ( $\text{M}+\text{H}$ ) $^+$ : 762.7653, found 762.7652.

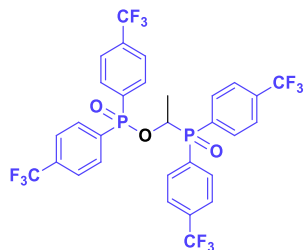

**1-(bis(4-(trifluoromethyl)phenyl)phosphoryl)ethyl bis(4-(trifluoromethyl)phenyl)phosphinate.**

Performed according to the general procedure (conditions A, 20.4 mg of **1a**, 202.8 mg of bis(4-(trifluoromethyl)phenyl)phosphine oxide **2d** and 4.9 mg of DMAP), and purified by column chromatography (dichloromethane / methanol = 100: 1) to afford 140.7 mg (0.196 mmol, 98%) of **3ac** as white solid:  $^1\text{H}$  NMR (500 MHz,  $\text{CDCl}_3$ ):  $\delta$  8.09-7.89 (m, 6H), 7.77-7.74 (m, 4H), 7.68-7.66 (m, 2H), 7.55-7.47 (m, 4H), 5.81-5.75 (m, 1H), 1.59 (dd,  $J_1 = 7.0$  Hz,  $J_2 = 14.7$  Hz, 3H).  $^{13}\text{C}$  NMR (125 MHz,  $\text{CDCl}_3$ ):  $\delta$  135.9, 134.8 (d,  $J_{\text{C-P}} = 3.8$  Hz), 134.7, 134.6 (dd,  $J_1 = 2.7$  Hz,  $J_2 = 32.9$  Hz), 134.5 (d,  $J_{\text{C-F}} = 133.9$  Hz), 134.4 (d,  $J_{\text{C-P}} = 3.1$  Hz), 134.2 (d,  $J_{\text{C-P}} = 3.0$  Hz), 134.1, 133.5 (d,  $J_{\text{C-P}} = 42.4$  Hz), 132.6 (d,  $J_{\text{C-P}} = 97.0$  Hz), 132.3 (d,  $J_{\text{C-P}} = 9.1$  Hz), 131.8 (d,  $J_{\text{C-P}} = 6.1$  Hz), 131.7 (d,  $J_{\text{C-P}} = 4.5$  Hz), 131.2 (d,  $J_{\text{C-P}} = 10.8$  Hz), 126.4, 125.9-125.7 (m), 125.6-125.2 (m), 123.1 (ddd,  $J_1 = 3.1$  Hz,  $J_2 = 9.8$  Hz,  $J_3 = 271.4$  Hz), 119.8 (dd,  $J_1 = 5.5$  Hz,  $J_2 = 14.8$  Hz), 69.8 (dd,  $J_1 = 7.4$  Hz,  $J_2 = 88.7$  Hz), 15.7.  $^{31}\text{P}$  NMR (203 MHz,  $\text{CDCl}_3$ ):  $\delta$  30.85 (d,  $J = 20.8$  Hz), 27.93 (d,  $J = 20.9$  Hz).  $^{19}\text{F}$  NMR (470 MHz,  $\text{CDCl}_3$ ):  $\delta$  -63.5, -63.67 (d,  $J = 80.7$  Hz). HRMS calc. for  $\text{C}_{30}\text{H}_{21}\text{F}_{12}\text{O}_3\text{P}_2$  ( $\text{M}+\text{H}$ ) $^+$ : 719.0769, found 719.0765.

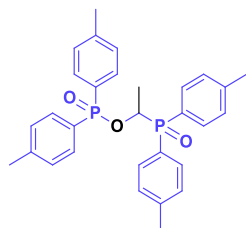

**1-(di-p-tolylphosphoryl)ethyl di-p-tolylphosphinate.** Performed according to the general procedure (conditions A, 20.4 mg of **1a**, 138.1 mg of di-p-tolylphosphine oxide **2e** and 4.9 mg of DMAP), and purified by column chromatography (dichloromethane / methanol = 100: 1) to afford 64.3 mg (0.128 mmol, 64%) of **3ad** as colorless oil:  $^1\text{H}$  NMR (500 MHz,  $\text{CDCl}_3$ ):  $\delta$  7.81 (dd,  $J_1 = 8.1$  Hz,  $J_2 = 10.9$  Hz, 2H), 7.63 (dd,  $J_1 = 8.1$  Hz,  $J_2 = 11.2$  Hz, 2H), 7.54 (dd,  $J_1 = 8.0$  Hz,  $J_2 = 12.2$  Hz, 2H), 7.278-7.12 (m, 8H), 7.04-7.02 (m, 2H), 5.37-5.31 (m, 1H), 2.39 (s, 6H), 2.37 (s, 3H), 2.34 (s, 3H), 1.50 (dd,  $J_1 = 7.0$  Hz,  $J_2 = 14.5$  Hz, 3H).  $^{13}\text{C}$  NMR (125 MHz,  $\text{CDCl}_3$ ):  $\delta$  142.7 (dd,  $J_1 = 2.7$  Hz,  $J_2 = 14.6$  Hz), 142.6, 132.3 (d,  $J_{\text{C-P}} = 2.8$  Hz), 132.2 (d,  $J_{\text{C-P}} = 8.9$  Hz), 131.5 (d,  $J_{\text{C-P}} = 10.0$  Hz), 131.3 (d,  $J_{\text{C-P}} = 11.0$  Hz), 129.3, 129.2 (d,  $J_{\text{C-P}} = 5.0$  Hz), 129.1 (d,  $J_{\text{C-P}} = 4.1$  Hz), 129.0, 128.9 (d,  $J_{\text{C-P}} = 13.7$  Hz), 128.1 (d,  $J_{\text{C-P}} = 35.2$  Hz), 127.1 (d,  $J_{\text{C-P}} = 2.8$  Hz), 125.1 (d,  $J_{\text{C-P}} = 101.0$  Hz), 128.3 (d,  $J_{\text{C-P}} = 13.3$  Hz), 69.8 (dd,  $J_1 = 8.0$  Hz,  $J_2 = 89.6$  Hz), 21.5 (d,  $J_{\text{C-P}} = 4.0$  Hz), 16.0.  $^{31}\text{P}$  NMR (203 MHz,  $\text{CDCl}_3$ ):  $\delta$  34.72 (d,  $J = 25.1$  Hz), 31.84 (d,  $J = 26.8$  Hz). HRMS calc. for  $\text{C}_{30}\text{H}_{33}\text{O}_3\text{P}_2$  ( $\text{M}+\text{H}$ ) $^+$ : 503.1899, found 503.1897.

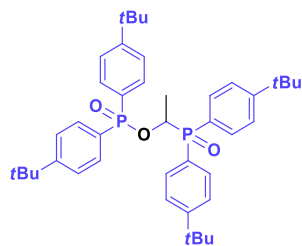

**1-(bis(4-(tert-butyl)phenyl)phosphoryl)ethyl bis(4-(tert-butyl)phenyl)phosphinate.** Performed according to the general procedure (conditions A, 20.4 mg of **1a**, 188.5 mg of bis(4-(tert-butyl)phenyl)phosphine oxide **2f** and 4.9 mg of DMAP), and purified by column chromatography (dichloromethane / methanol = 100: 1) to afford 101.8 mg (0.152 mmol, 76%) of **3ae** as white solid:  $^1\text{H}$  NMR (500 MHz,  $\text{CDCl}_3$ ):  $\delta$  7.92 (dd,  $J_1 = 8.4$  Hz,  $J_2 = 10.7$  Hz, 2H), 7.73 (dd,  $J_1 = 8.4$  Hz,  $J_2 = 11.0$  Hz, 2H), 7.58 (dd,  $J_1 = 8.4$  Hz,  $J_2 = 12.0$  Hz, 2H), 7.53-7.48 (m, 4H), 7.41-7.39 (m, 2H), 7.28-7.25 (m, 2H), 7.17-7.13 (m, 2H), 5.35-5.28 (m, 1H), 1.51 (dd,  $J_1 = 7.0$  Hz,  $J_2 = 14.6$  Hz, 3H), 1.34 (d,  $J = 2.1$  Hz, 18H), 1.31 (s, 9H), 1.28 (s, 9H).  $^{13}\text{C}$  NMR (125 MHz,  $\text{CDCl}_3$ ):  $\delta$  155.6 (dd,  $J_1 = 2.8$  Hz,  $J_2 = 4.6$  Hz), 155.5 (dd,  $J_1 = 2.6$  Hz,  $J_2 = 25.8$  Hz), 132.1 (d,  $J_{\text{C-P}} = 8.9$  Hz), 131.6, 131.5, 131.4, 131.3 (d,  $J_{\text{C-P}} = 11.0$  Hz), 129.2, 128.1, 127.2 (d,  $J_{\text{C-P}} = 36.2$  Hz), 125.6, 125.5 (d,  $J_{\text{C-P}} = 2.1$  Hz), 125.4 (d,  $J_{\text{C-P}} = 6.9$  Hz), 125.2, 125.1, 124.7, 70.1 (dd,  $J_1 = 8.1$  Hz,  $J_2 = 89.9$  Hz), 35.0, 34.9 (d,  $J_{\text{C-P}} = 9.1$  Hz), 31.1 (d,  $J_{\text{C-P}} = 2.6$  Hz), 31.0 (d,  $J_{\text{C-P}} = 3.7$  Hz), 15.9.  $^{31}\text{P}$  NMR (203 MHz,  $\text{CDCl}_3$ ):  $\delta$  34.26 (d,  $J = 26.1$  Hz), 31.54 (d,  $J = 27.4$  Hz). HRMS calc. for  $\text{C}_{42}\text{H}_{57}\text{O}_3\text{P}_2$  ( $\text{M}+\text{H}$ ) $^+$ : 671.3778, found 671.3773.

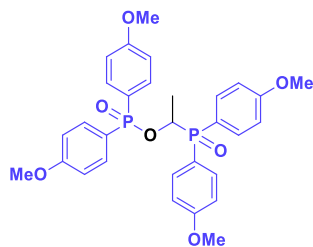

**1-(bis(4-methoxyphenyl)phosphoryl)ethyl bis(4-methoxyphenyl)phosphinate.** Performed according to the general procedure (conditions A, 20.4 mg of **1a**, 157.2 mg of bis(4-methoxyphenyl)phosphine oxide **2g** and 4.9 mg of DMAP), and purified by column chromatography (dichloromethane / methanol = 100: 1) to afford 83.8 mg (0.148 mmol, 74%) of **3af** as white solid:  $^1\text{H}$  NMR (500 MHz,  $\text{CDCl}_3$ ):  $\delta$  7.84 (dd,  $J_1 = 8.8$  Hz,  $J_2 = 10.6$  Hz, 2H), 7.68-7.56 (m, 4H), 7.20 (dd,  $J_1 = 8.8$  Hz,  $J_2 = 12.1$  Hz, 2H), 6.97-6.89 (m, 6H), 6.74 (dd,  $J_1 = 2.7$  Hz,  $J_2 = 8.8$  Hz, 2H), 5.33-5.29 (m, 1H), 3.84 (d,  $J = 3.5$  Hz, 6H), 3.81 (d,  $J = 7.2$  Hz, 6H), 1.50 (dd,  $J_1 = 7.0$  Hz,  $J_2 = 14.5$  Hz, 3H).  $^{13}\text{C}$  NMR (125 MHz,  $\text{CDCl}_3$ ):  $\delta$  162.6 (t,  $J = 2.2$  Hz), 162.4 (dd,  $J_1 = 2.7$  Hz,  $J_2 = 31.3$  Hz), 134.0 (d,  $J_{\text{C-P}} = 10.0$  Hz), 133.4 (d,  $J_{\text{C-P}} = 11.2$  Hz), 133.2 (d,  $J_{\text{C-P}} = 12.0$  Hz), 123.4 (d,  $J_{\text{C-P}} = 126.3$  Hz), 122.7 (d,  $J_{\text{C-P}} = 38.8$  Hz), 121.7 (d,  $J_{\text{C-P}} = 17.2$  Hz), 119.4 (d,  $J_{\text{C-P}} = 105.0$  Hz), 114.2, 114.1, 114.0 (d,  $J_{\text{C-P}} = 3.6$  Hz), 113.8 (d,  $J_{\text{C-P}} = 11.2$  Hz), 113.6, 69.8 (dd,  $J_1 = 8.0$  Hz,  $J_2 = 90.6$  Hz), 55.2 (d,  $J_{\text{C-P}} = 2.9$  Hz), 55.1 (d,  $J_{\text{C-P}} = 4.1$  Hz), 16.0.  $^{31}\text{P}$  NMR (203 MHz,  $\text{CDCl}_3$ ):  $\delta$  34.65 (d,  $J = 25.6$  Hz), 31.73 (d,  $J = 25.3$  Hz). HRMS calc. for  $\text{C}_{30}\text{H}_{33}\text{O}_7\text{P}_2$  ( $\text{M}+\text{H}$ ) $^+$ : 567.1696, found 567.1694.

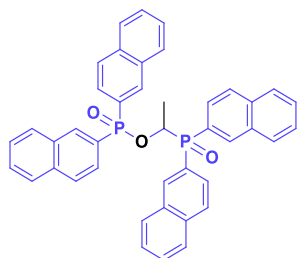

**1-(di(naphthalen-2-yl)phosphoryl)ethyl di(naphthalen-2-yl)phosphinate.** Performed according to the general procedure (conditions A, 20.4 mg of **1a**, 181.3 mg of di(naphthalen-2-yl)phosphine oxide **2h** and 4.9 mg of DMAP), and purified by column chromatography (dichloromethane / methanol = 100: 1) to afford 86.6 mg (0.134 mmol, 67%) of **3ag** as colorless oil:  $^1\text{H}$  NMR (500 MHz,  $\text{CDCl}_3$ ):  $\delta$  8.69 (d,  $J = 13.2$  Hz, 1H), 8.43 (d,  $J = 13.3$  Hz, 1H), 8.34 (d,  $J = 14.4$  Hz, 1H), 7.98-7.75 (m, 12H), 7.68-7.47 (m, 9H), 7.39-7.34 (m, 2H), 7.28-7.25 (m, 1H), 7.10-7.06 (m, 1H), 5.81-5.78 (m, 1H), 1.68 (dd,  $J_1 = 7.0$  Hz,  $J_2 = 14.5$  Hz, 3H).  $^{13}\text{C}$  NMR (125 MHz,  $\text{CDCl}_3$ ):  $\delta$  134.8 (d,  $J_{\text{C-P}} = 2.7$  Hz), 134.6 (dd,  $J_1 = 1.9$  Hz,  $J_2 = 38.5$  Hz), 133.6 (dd,  $J_1 = 8.5$  Hz,  $J_2 = 12.0$  Hz), 133.2 (d,  $J_{\text{C-P}} = 10.0$  Hz), 132.5 (d,  $J_{\text{C-P}} = 12.8$  Hz), 132.3 (d,  $J_{\text{C-P}} = 14.6$  Hz), 131.9 (d,  $J_{\text{C-P}} = 14.6$  Hz), 129.5, 128.9 (d,  $J_{\text{C-P}} = 4.4$  Hz), 128.8 (d,  $J_{\text{C-P}} = 17.7$  Hz), 128.6 (d,  $J_{\text{C-P}} = 11.3$  Hz), 128.5, 128.4 (d,  $J_{\text{C-P}} = 2.2$  Hz), 128.3 (d,  $J_{\text{C-P}} = 4.1$  Hz), 128.2 (d,  $J_{\text{C-P}} = 7.3$  Hz), 128.1, 127.9 (d,  $J_{\text{C-P}} = 13.0$  Hz), 127.8, 127.7 (d,  $J_{\text{C-P}} = 17.7$  Hz), 127.2 (d,  $J_{\text{C-P}} = 30.5$  Hz), 127.0 (d,  $J_{\text{C-P}} = 8.5$  Hz), 126.8 (d,  $J_{\text{C-P}} = 31.6$  Hz), 126.5 (d,  $J_{\text{C-P}} = 10.0$  Hz), 126.2 (d,  $J_{\text{C-P}} = 11.2$  Hz), 126.0 (d,  $J_{\text{C-P}} = 9.9$  Hz), 125.7 (d,  $J_{\text{C-P}} = 98.9$  Hz), 125.6 (d,  $J_{\text{C-P}} = 11.5$  Hz), 70.1 (dd,  $J_1 = 7.7$  Hz,  $J_2 = 89.3$  Hz), 16.3.  $^{31}\text{P}$  NMR (203 MHz,  $\text{CDCl}_3$ ):  $\delta$  34.54 (d,  $J = 25.1$  Hz), 31.53 (d,  $J = 25.1$  Hz). HRMS calc. for  $\text{C}_{42}\text{H}_{33}\text{O}_3\text{P}_2$  (M+H) $^+$ : 647.1899, found 647.1897.

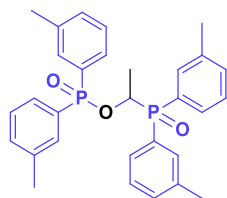

**1-(di-m-tolylphosphoryl)ethyl di-m-tolylphosphinate.** Performed according to the general procedure (conditions A, 20.4 mg of **1a**, 138.1 mg of di-*o*-tolylphosphine oxide **2i** and 4.9 mg of DMAP), and purified by column chromatography (dichloromethane / methanol = 100: 1) to afford 79.3 mg (0.158 mmol, 79%) of **3ah** as colorless oil:  $^1\text{H}$  NMR (500 MHz,  $\text{CDCl}_3$ ):  $\delta$  7.80 (d,  $J = 11.6$  Hz, 1H), 7.75-7.71 (m, 1H), 7.62 (d,  $J = 11.7$  Hz, 1H), 7.55-7.53 (m, 2H), 7.48-7.44 (m, 1H), 7.34-7.27 (m, 6H), 7.23-7.10 (m, 3H), 7.03-6.99 (m, 1H), 5.44-5.38 (m, 1H), 2.34 (s, 6H), 2.33 (s, 3H), 2.23 (s, 3H), 1.52 (dd,  $J_1 = 7.0$  Hz,  $J_2 = 14.5$  Hz, 3H).  $^{13}\text{C}$  NMR (125 MHz,  $\text{CDCl}_3$ ):  $\delta$  138.6 (d,  $J_{\text{C-P}} = 11.3$  Hz), 138.3 (d,  $J_{\text{C-P}} = 10.3$  Hz), 138.2, 138.0 (d,  $J_{\text{C-P}} = 13.3$  Hz), 133.0 (d,  $J_{\text{C-P}} = 2.8$  Hz), 132.9 (dd,  $J_1 = 2.7$  Hz,  $J_2 = 5.6$  Hz), 132.8 (d,  $J_{\text{C-P}} = 2.7$  Hz), 132.7 (d,  $J_{\text{C-P}} = 8.3$  Hz), 131.9 (t,  $J_{\text{C-P}} = 11.0$  Hz), 131.8 (t,  $J_{\text{C-P}} = 134.3$  Hz), 131.6 (d,  $J_{\text{C-P}} = 10.2$  Hz), 131.0 (d,  $J_{\text{C-P}} = 30.8$  Hz), 130.1 (d,  $J_{\text{C-P}} = 7.3$  Hz), 129.0 (d,  $J_{\text{C-P}} = 9.0$  Hz), 128.8, 128.6 (d,  $J_{\text{C-P}} = 7.7$  Hz), 128.5, 128.4 (d,  $J_{\text{C-P}} = 5.1$  Hz), 128.3, 128.2, 128.1 (d,  $J_{\text{C-P}} = 10.1$  Hz), 128.0, 69.9 (dd,  $J_1 = 7.9$  Hz,  $J_2 = 88.9$  Hz), 21.3, 21.2 (d,  $J_{\text{C-P}} = 6.9$  Hz), 15.9.  $^{31}\text{P}$  NMR (203 MHz,  $\text{CDCl}_3$ ):  $\delta$  34.46 (d,  $J = 27.2$  Hz), 31.29 (d,  $J = 25.9$  Hz). HRMS calc. for  $\text{C}_{30}\text{H}_{33}\text{O}_3\text{P}_2$  (M+H) $^+$ : 503.1899, found 503.1896.

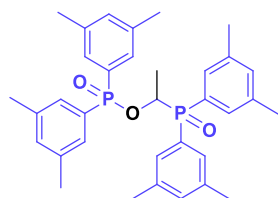

**1-(bis(3,5-dimethylphenyl)phosphoryl)ethyl bis(3,5-dimethylphenyl)phosphinate.** Performed according to the general procedure (conditions A, 20.4 mg of **1a**, 154.9 mg of bis(3,5-dimethylphenyl)phosphine oxide **2j** and 4.9 mg of DMAP), and purified by column chromatography (dichloromethane / methanol = 100: 1) to afford 34.6 mg (0.062 mmol, 31%) of **3ai** as colorless oil:  $^1\text{H}$  NMR (500 MHz,  $\text{CDCl}_3$ ):  $\delta$  7.58 (d,  $J = 11.4$  Hz, 2H), 7.40 (d,  $J = 11.5$  Hz, 2H), 7.33

(d,  $J = 12.7$  Hz, 2H), 7.11 (s, 3H), 7.02 (s, 1H), 6.92 (d,  $J = 12.9$  Hz, 2H), 5.46-5.40 (m, 1H), 2.30 (s, 6H), 2.27 (s, 12H), 2.17 (s, 6H), 1.50 (dd,  $J_1 = 7.0$  Hz,  $J_2 = 14.4$  Hz, 3H).  $^{13}\text{C}$  NMR (125 MHz,  $\text{CDCl}_3$ ):  $\delta$  138.3 (d,  $J_{\text{C-P}} = 12.0$  Hz), 138.1 (d,  $J_{\text{C-P}} = 1.6$  Hz), 138.0 (d,  $J_{\text{C-P}} = 3.6$  Hz), 137.7 (d,  $J_{\text{C-P}} = 14.0$  Hz), 133.8 (ddd,  $J_1 = 2.7$  Hz,  $J_2 = 11.8$  Hz,  $J_3 = 23.0$  Hz), 132.2 (d,  $J_{\text{C-P}} = 132.9$  Hz), 130.8 (d,  $J_{\text{C-P}} = 135.0$  Hz), 130.6 (t,  $J_{\text{C-P}} = 96.5$  Hz), 129.5 (t,  $J_{\text{C-P}} = 8.7$  Hz), 129.0 (d,  $J_{\text{C-P}} = 10.2$  Hz), 128.9 (d,  $J_{\text{C-P}} = 8.9$  Hz), 128.8 (d,  $J_{\text{C-P}} = 87.9$  Hz), 128.7 (d,  $J_{\text{C-P}} = 10.4$  Hz), 69.7 (dd,  $J_1 = 7.8$  Hz,  $J_2 = 88.6$  Hz), 21.2 (d,  $J_{\text{C-P}} = 3.8$  Hz), 21.1, 15.9.  $^{31}\text{P}$  NMR (203 MHz,  $\text{CDCl}_3$ ):  $\delta$  35.03 (d,  $J = 26.0$  Hz), 30.97 (d,  $J = 25.3$  Hz). HRMS calc. for  $\text{C}_{34}\text{H}_{41}\text{O}_3\text{P}_2$  (M+H) $^+$ : 559.2525, found 559.2525.

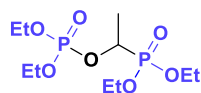

**1-(diethoxyphosphoryl)ethyl diethyl phosphate.** Performed according to the general procedure (conditions B, 20.4 mg of **1a**, 82.8 mg of diethyl phosphonate **4a** and 45.7 mg of DBU), and purified by column chromatography (petroleum ether/ethyl acetate = 2: 1, 300 mL, then dichloromethane / methanol = 30: 1) to afford 38.2 mg (0.12 mmol, 60%) of **5a** as colorless oil:  $^1\text{H}$  NMR (500 MHz,  $\text{CDCl}_3$ ):  $\delta$  4.74-4.66 (m, 1H), 4.24-4.10 (m, 8H), 1.59 (dd,  $J_1 = 7.1$  Hz,  $J_2 = 16.7$  Hz, 3H), 1.37-1.34 (m, 12H).  $^{13}\text{C}$  NMR (125 MHz,  $\text{CDCl}_3$ ):  $\delta$  69.1 (dd,  $J_1 = 7.0$  Hz,  $J_2 = 173.1$  Hz), 64.0 (dd,  $J_1 = 6.1$  Hz,  $J_2 = 16.0$  Hz), 62.9 (dd,  $J_1 = 6.7$  Hz,  $J_2 = 18.3$  Hz), 16.6, 16.4 (t,  $J_{\text{C-P}} = 5.7$  Hz), 16.0 (d,  $J_{\text{C-P}} = 6.8$  Hz).  $^{31}\text{P}$  NMR (203 MHz,  $\text{CDCl}_3$ ):  $\delta$  20.30 (d,  $J = 32.6$  Hz), -1.17 (d,  $J = 32.6$  Hz). MS (ESI): 318.6 (M+H) $^+$ . The analytical data matched those reported in the literature.<sup>[9]</sup>

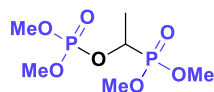

**1-(dimethoxyphosphoryl)ethyl dimethyl phosphate** Performed according to the general procedure (conditions B, 20.4 mg of **1a**, 66.0 mg of dimethyl phosphonate **4b** and 45.7 mg of DBU), and purified by column chromatography (petroleum ether/ethyl acetate = 2: 1, 300 mL, then dichloromethane / methanol = 30: 1) to afford 21.5 mg (0.164 mmol, 41%) of **5b** as colorless oil:  $^1\text{H}$  NMR (500 MHz,  $\text{CDCl}_3$ ):  $\delta$  4.78-4.71 (m, 1H), 3.86-3.78 (m, 12H), 1.59 (dd,  $J_1 = 7.1$  Hz,  $J_2 = 16.8$  Hz, 3H).  $^{13}\text{C}$  NMR (125 MHz,  $\text{CDCl}_3$ ):  $\delta$  69.1 (dd,  $J_1 = 6.6$  Hz,  $J_2 = 172.9$  Hz), 54.5 (dd,  $J_1 = 6.1$  Hz,  $J_2 = 19.0$  Hz), 53.5 (dd,  $J_1 = 6.7$  Hz,  $J_2 = 22.8$  Hz), 16.6.  $^{31}\text{P}$  NMR (203 MHz,  $\text{CDCl}_3$ ):  $\delta$  22.54 (d,  $J = 30.1$  Hz), 1.08 (d,  $J = 30.9$  Hz). MS (ESI): 262.6 (M+H) $^+$ .

The analytical data matched those reported in the literature.<sup>[9]</sup>

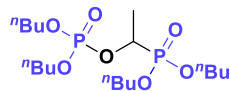

**dibutyl 1-(dibutoxyphosphoryl)ethyl phosphate.** Performed according to the general procedure (conditions B, 20.4 mg of **1a**, 116.4 mg of dibutyl phosphonate **4c** and 45.7 mg of DBU), and purified by column chromatography (petroleum ether/ethyl acetate = 2: 1, 300 mL, then dichloromethane / methanol = 30: 1) to afford 35.7 mg (0.076 mmol, 38%) of **5c** as colorless oil:  $^1\text{H}$  NMR (500 MHz,  $\text{CDCl}_3$ ):  $\delta$  4.74-4.66 (m, 1H), 4.16-4.03 (m, 8H), 1.70-1.64 (m, 8H), 1.58 (dd,  $J_1 = 7.1$  Hz,  $J_2 = 16.7$  Hz, 3H), 1.45-1.34 (m, 8H), 0.94 (td,  $J_1 = 1.1$  Hz,  $J_2 = 7.4$  Hz, 12H).  $^{13}\text{C}$  NMR (125 MHz,  $\text{CDCl}_3$ ):  $\delta$  69.2 (dd,  $J_1 = 7.0$  Hz,  $J_2 = 173.1$  Hz), 67.7 (dd,  $J_1 = 6.3$  Hz,  $J_2 = 14.1$  Hz), 66.6 (dd,  $J_1 = 7.1$  Hz,  $J_2 = 19.8$  Hz), 32.5 (dd,  $J_1 = 4.2$  Hz,  $J_2 = 5.6$  Hz), 32.2 (dd,  $J_1 = 2.5$  Hz,  $J_2 = 7.2$  Hz), 18.6 (d,  $J_{\text{C-P}} = 1.8$  Hz), 16.7, 13.5 (d,  $J_{\text{C-P}} = 2.7$  Hz).  $^{31}\text{P}$  NMR (203 MHz,  $\text{CDCl}_3$ ):  $\delta$  20.26 (d,  $J = 32.7$  Hz), -0.93 (d,  $J = 32.7$  Hz).

HRMS calc. for C<sub>18</sub>H<sub>41</sub>O<sub>7</sub>P<sub>2</sub> (M+H)<sup>+</sup>: 431.2322, found 431.2320.

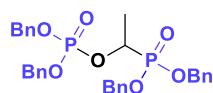

**dibenzyl (1-(bis(benzyloxy)phosphoryl)ethyl) phosphate.** Performed according to the general procedure (conditions B, 20.4 mg of **1a**, 157.3 mg of dibenzyl phosphonate **4d** and 45.7 mg of DBU), and purified by column chromatography (petroleum ether/ethyl acetate = 2: 1, 300 mL, then dichloromethane / methanol = 30: 1) to afford 54.3 mg (0.096 mmol, 48%) of **5d** as colorless oil: <sup>1</sup>H NMR (500 MHz, CDCl<sub>3</sub>): δ 7.33-7.25 (m, 20H), 5.06-4.97 (m, 8H), 4.86-4.76 (m, 1H), 1.52 (dd, *J*<sub>1</sub> = 7.1 Hz, *J*<sub>2</sub> = 17.1 Hz, 3H). <sup>13</sup>C NMR (125 MHz, CDCl<sub>3</sub>): δ 135.8 (dd, *J*<sub>1</sub> = 5.7 Hz, *J*<sub>2</sub> = 7.2 Hz), 135.5 (t, *J*<sub>C-P</sub> = 7.3 Hz), 128.5, 128.4 (d, *J*<sub>C-P</sub> = 4.5 Hz), 128.3, 128.0 (d, *J*<sub>C-P</sub> = 9.5 Hz), 127.8 (d, *J*<sub>C-P</sub> = 3.4 Hz), 69.7 (dd, *J*<sub>1</sub> = 7.1 Hz, *J*<sub>2</sub> = 173.2 Hz), 69.4 (d, *J*<sub>C-P</sub> = 5.6 Hz), 68.2 (dd, *J*<sub>1</sub> = 7.0 Hz, *J*<sub>2</sub> = 18.3 Hz), 16.5. <sup>31</sup>P NMR (203 MHz, CDCl<sub>3</sub>): δ 20.95 (d, *J* = 32.6 Hz), -1.22 (d, *J* = 32.6 Hz). HRMS calc. for C<sub>30</sub>H<sub>33</sub>O<sub>7</sub>P<sub>2</sub> (M+H)<sup>+</sup>: 567.1696, found 567.1693.

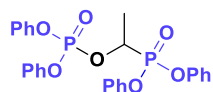

**1-(diphenoxyphosphoryl)ethyl diphenyl phosphate.** Performed according to the general procedure (conditions B, 20.4 mg of **1a**, 140.4 mg of diphenyl phosphonate **4e** and 36.7 mg of DMAP, stirred at 90 °C instead), and purified by column chromatography (petroleum ether/ethyl acetate = 6: 1) to afford 78.6 mg (0.154 mmol, 77%) of **5e** as colorless oil: <sup>1</sup>H NMR (500 MHz, CDCl<sub>3</sub>): δ 7.35-7.09 (m, 20H), 5.29-5.21 (m, 1H), 1.72 (dd, *J*<sub>1</sub> = 7.1 Hz, *J*<sub>2</sub> = 17.9 Hz, 3H). <sup>13</sup>C NMR (125 MHz, CDCl<sub>3</sub>): δ 150.2 (dd, *J*<sub>1</sub> = 7.4 Hz, *J*<sub>2</sub> = 12.9 Hz), 149.9 (dd, *J*<sub>1</sub> = 9.3 Hz, *J*<sub>2</sub> = 17.3 Hz), 129.8, 129.7 (d, *J*<sub>C-P</sub> = 3.1 Hz), 125.5 (d, *J*<sub>C-P</sub> = 15.5 Hz), 125.4, 120.5 (dd, *J*<sub>1</sub> = 2.1 Hz, *J*<sub>2</sub> = 3.9 Hz), 120.1 (dd, *J*<sub>1</sub> = 4.7 Hz, *J*<sub>2</sub> = 8.3 Hz), 70.5 (dd, *J*<sub>1</sub> = 7.1 Hz, *J*<sub>2</sub> = 175.5 Hz), 16.6. <sup>31</sup>P NMR (203 MHz, CDCl<sub>3</sub>): δ 12.2 (d, *J* = 35.6 Hz), -12.01 (d, *J* = 36.7 Hz). HRMS calc. for C<sub>26</sub>H<sub>25</sub>O<sub>7</sub>P<sub>2</sub> (M+H)<sup>+</sup>: 511.1070, found 511.1065.

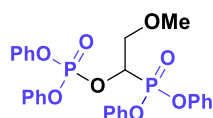

**1-(diphenoxyphosphoryl)-2-methoxyethyl diphenyl phosphate.** Performed according to the general procedure (conditions B, 32.4 mg of **1e**, 140.4 mg of diphenyl phosphonate **4e** and 36.7 mg of DMAP, stirred at 90 °C instead), and purified by column chromatography (petroleum ether/ethyl acetate = 6: 1) to afford 70.2 mg (0.13 mmol, 65%) of **5f** as colorless oil: <sup>1</sup>H NMR (500 MHz, CDCl<sub>3</sub>): δ 7.36-7.23 (m, 12H), 7.22-7.09 (m, 8H), 5.39-5.33 (m, 1H), 3.91-3.89 (m, 2H), 3.23 (s, 3H). <sup>13</sup>C NMR (125 MHz, CDCl<sub>3</sub>): δ 150.5 (dd, *J*<sub>1</sub> = 7.4 Hz, *J*<sub>2</sub> = 15.3 Hz), 149.8 (dd, *J*<sub>1</sub> = 9.2 Hz, *J*<sub>2</sub> = 25.7 Hz), 129.8, 129.7 (d, *J*<sub>C-P</sub> = 5.3 Hz), 125.5 (d, *J*<sub>C-P</sub> = 10.6 Hz), 120.7 (dd, *J*<sub>1</sub> = 4.0 Hz, *J*<sub>2</sub> = 9.4 Hz), 120.3, 120.2 (d, *J*<sub>C-P</sub> = 4.1 Hz), 73.6 (dd, *J*<sub>1</sub> = 7.3 Hz, *J*<sub>2</sub> = 169.7 Hz), 70.8 (dd, *J*<sub>1</sub> = 1.5 Hz, *J*<sub>2</sub> = 4.6 Hz), 58.9. <sup>31</sup>P NMR (203 MHz, CDCl<sub>3</sub>): δ 9.61 (d, *J* = 27.6 Hz), -11.92 (d, *J* = 27.7 Hz). HRMS calc. for C<sub>27</sub>H<sub>27</sub>O<sub>8</sub>P<sub>2</sub> (M+H)<sup>+</sup>: 541.1176, found 541.1173.

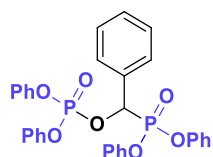

**(diphenoxyphosphoryl)(phenyl)methyl diphenyl phosphate.** Performed according to the general

procedure (conditions B, 45.2 mg of **1k**, 140.4 mg of diphenyl phosphonate **4e** and 36.7 mg of DMAP, stirred at 90 °C instead), and purified by column chromatography (petroleum ether/ethyl acetate = 6: 1) to afford 77.8 mg (0.136 mmol, 68%) of **5g** as colorless oil: <sup>1</sup>H NMR (500 MHz, CDCl<sub>3</sub>): δ 7.56-7.54 (m, 2H), 7.37-7.30 (m, 3H), 7.27-7.06 (m, 14H), 7.03-7.01(m, 2H), 6.93-6.88 (m, 4H), 6.12 (dd, *J*<sub>1</sub> = 10.4 Hz, *J*<sub>2</sub> = 13.1 Hz, 1H). <sup>13</sup>C NMR (125 MHz, CDCl<sub>3</sub>): δ 150.1 (dd, *J*<sub>1</sub> = 7.4 Hz, *J*<sub>2</sub> = 29.1 Hz), 150.0 (dd, *J*<sub>1</sub> = 5.7 Hz, *J*<sub>2</sub> = 8.1 Hz), 131.6, 129.6 (d, *J*<sub>C-P</sub> = 7.4 Hz), 129.6 (d, *J*<sub>C-P</sub> = 4.4 Hz), 128.6 (d, *J*<sub>C-P</sub> = 1.7 Hz), 128.5 (d, *J*<sub>C-P</sub> = 6.4 Hz), 125.4, 125.3 (d, *J*<sub>C-P</sub> = 2.3 Hz), 120.3 (dd, *J*<sub>1</sub> = 4.4 Hz, *J*<sub>2</sub> = 9.9 Hz), 120.1 (d, *J*<sub>C-P</sub> = 5.1 Hz), 119.9 (d, *J*<sub>C-P</sub> = 5.1 Hz), 75.9 (dd, *J*<sub>1</sub> = 6.7 Hz, *J*<sub>2</sub> = 176.5 Hz). <sup>31</sup>P NMR (203 MHz, CDCl<sub>3</sub>): δ 8.33 (d, *J* = 40.1 Hz), -11.69 (d, *J* = 40.2 Hz). HRMS calc. for C<sub>31</sub>H<sub>27</sub>O<sub>7</sub>P<sub>2</sub> (M+H)<sup>+</sup>: 573.1226, found 573.1222.

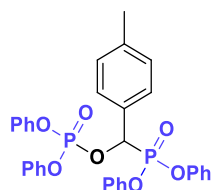

**(diphenoxyphosphoryl)(p-tolyl)methyl diphenyl phosphate.** Performed according to the general procedure (conditions B, 50.9 mg of **1l**, 140.4 mg of diphenyl phosphonate **4e** and 36.7 mg of DMAP, stirred at 90 °C instead), and purified by column chromatography (petroleum ether/ethyl acetate = 6: 1) to afford 73.8 mg (0.126 mmol, 63%) of **5h** as colorless oil: <sup>1</sup>H NMR (500 MHz, CDCl<sub>3</sub>): δ 7.72 (dd, *J*<sub>1</sub> = 1.8 Hz, *J*<sub>2</sub> = 8.1 Hz, 2H), 7.27-7.07 (m, 16H), 7.03 (d, *J* = 7.0 Hz, 2H), 6.94-6.89 (m, 4H), 6.08 (dd, *J*<sub>1</sub> = 10.3 Hz, *J*<sub>2</sub> = 12.8 Hz, 1H), 2.34 (d, *J* = 0.7 Hz, 3H). <sup>13</sup>C NMR (125 MHz, CDCl<sub>3</sub>): δ 150.2 (dd, *J*<sub>1</sub> = 7.3 Hz, *J*<sub>2</sub> = 25.1 Hz), 150.0 (dd, *J*<sub>1</sub> = 10.0 Hz, *J*<sub>2</sub> = 13.6 Hz), 139.6 (d, *J*<sub>C-P</sub> = 2.8 Hz), 129.6 (d, *J*<sub>C-P</sub> = 6.1 Hz), 129.5 (d, *J*<sub>C-P</sub> = 7.6 Hz), 129.3 (d, *J*<sub>C-P</sub> = 1.6 Hz), 128.5 (d, *J*<sub>C-P</sub> = 6.9 Hz), 125.4 (d, *J*<sub>C-P</sub> = 25.5 Hz), 125.3 (d, *J*<sub>C-P</sub> = 2.5 Hz), 120.4 (dd, *J*<sub>1</sub> = 4.3 Hz, *J*<sub>2</sub> = 9.6 Hz), 120.1 (d, *J*<sub>C-P</sub> = 4.9 Hz), 119.9 (d, *J*<sub>C-P</sub> = 4.8 Hz), 75.9 (dd, *J*<sub>1</sub> = 7.1 Hz, *J*<sub>2</sub> = 178.0 Hz), 21.3. <sup>31</sup>P NMR (203 MHz, CDCl<sub>3</sub>): δ 8.55 (d, *J* = 40.5 Hz), -11.74 (d, *J* = 40.1 Hz). HRMS calc. for C<sub>32</sub>H<sub>29</sub>O<sub>7</sub>P<sub>2</sub> (M+H)<sup>+</sup>: 587.1383, found 587.1379.

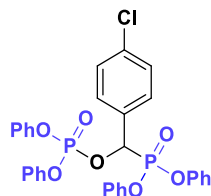

**(diphenoxyphosphoryl)(p-tolyl)methyl diphenyl phosphate.** Performed according to the general procedure (conditions B, 59.0 mg of **1o**, 140.4 mg of diphenyl phosphonate **4e** and 36.7 mg of DMAP, stirred at 90 °C instead), and purified by column chromatography (petroleum ether/ethyl acetate = 6: 1) to afford 72.7 mg (0.12 mmol, 60%) of **5i** as colorless oil: <sup>1</sup>H NMR (500 MHz, CDCl<sub>3</sub>): δ 7.44 (dd, *J*<sub>1</sub> = 2.0 Hz, *J*<sub>2</sub> = 8.5 Hz, 2H), 7.29-7.10 (m, 16H), 7.03 (d, *J* = 8.6 Hz, 2H), 6.95 (d, *J* = 8.6 Hz, 2H), 6.91 (d, *J* = 8.6 Hz, 2H), 6.07 (dd, *J*<sub>1</sub> = 10.5 Hz, *J*<sub>2</sub> = 13.3 Hz, 1H). <sup>13</sup>C NMR (125 MHz, CDCl<sub>3</sub>): δ 150.2 (d, *J*<sub>C-P</sub> = 7.3 Hz), 150.0, 149.9 (d, *J*<sub>C-P</sub> = 3.6 Hz), 149.8 (d, *J*<sub>C-P</sub> = 9.2 Hz), 135.7 (d, *J*<sub>C-P</sub> = 3.5 Hz), 130.3, 129.8, 129.7, 129.6 (d, *J*<sub>C-P</sub> = 3.3 Hz), 129.5, 128.8 (d, *J*<sub>C-P</sub> = 1.6 Hz), 125.6, 125.4 (d, *J*<sub>C-P</sub> = 5.8 Hz), 120.3 (dd, *J*<sub>1</sub> = 4.2 Hz, *J*<sub>2</sub> = 8.8 Hz), 120.1 (d, *J*<sub>C-P</sub> = 5.2 Hz), 119.8 (d, *J*<sub>C-P</sub> = 4.9 Hz), 75.1 (dd, *J*<sub>1</sub> = 7.0 Hz, *J*<sub>2</sub> = 177.1 Hz). <sup>31</sup>P NMR (203 MHz, CDCl<sub>3</sub>): δ 7.77 (d, *J* = 38.1 Hz), -11.68 (d, *J* = 40.1 Hz). HRMS calc. for C<sub>31</sub>H<sub>26</sub>ClO<sub>7</sub>P<sub>2</sub> (M+H)<sup>+</sup>: 607.0837, found 607.0835.

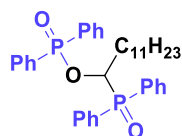

**1-(diphenylphosphoryl)dodecyl diphenylphosphinate** Performed according to the general procedure (conditions A, 79.7 mg of **6e**, 121.2 mg of diphenylphosphine oxide **2a** and 4.9 mg of DMAP), and purified by column chromatography (dichloromethane / methanol = 100: 1) to afford 73.9 mg (0.126 mg, 63%) of **3r** as colorless oil:  $^1\text{H}$  NMR (500 MHz,  $\text{CDCl}_3$ ):  $\delta$  7.95-7.92 (m, 2H), 7.80-7.69 (m, 4H), 7.50-7.47 (m, 2H), 7.43-7.34 (m, 8H), 7.30-7.26 (m, 2H), 7.20-7.19 (m, 2H), 5.52-5.47 (m, 1H), 1.92-1.85 (m, 2H), 1.29-1.10 (m, 14H), 1.03-1.01 (m, 2H), 0.97-0.95 (m, 2H), 0.90-0.87 (td,  $J_1 = 1.3$  Hz,  $J_2 = 6.9$  Hz, 3H).  $^{13}\text{C}$  NMR (125 MHz,  $\text{CDCl}_3$ ):  $\delta$  132.8, 132.1 (d,  $J_{\text{C-P}} = 2.6$  Hz), 132.1 (d,  $J_{\text{C-P}} = 2.7$  Hz), 132.0 (d,  $J_{\text{C-P}} = 2.7$  Hz), 131.9 (d,  $J_{\text{C-P}} = 8.9$  Hz), 131.7 (d,  $J_{\text{C-P}} = 2.1$  Hz), 131.6 (d,  $J_{\text{C-P}} = 2.6$  Hz), 131.4, 131.3 (d,  $J_{\text{C-P}} = 7.2$  Hz), 131.2 (d,  $J_{\text{C-P}} = 6.0$  Hz), 131.0 (d,  $J_{\text{C-P}} = 10.3$  Hz), 130.6, 129.3, 128.6 (d,  $J_{\text{C-P}} = 11.8$  Hz), 128.3 (d,  $J_{\text{C-P}} = 12.6$  Hz), 128.1 (d,  $J_{\text{C-P}} = 13.2$  Hz), 73.8 (dd,  $J_1 = 8.3$  Hz,  $J_2 = 87.4$  Hz), 31.8, 30.4, 29.5 (d,  $J_{\text{C-P}} = 1.6$  Hz), 29.2, 29.1, 29.0, 28.9, 25.9, 25.8, 22.6, 14.0.  $^{31}\text{P}$  NMR (203 MHz,  $\text{CDCl}_3$ ):  $\delta$  33.65 (d,  $J = 20.1$  Hz), 30.7 (d,  $J = 20.1$  Hz). HRMS calc. for  $\text{C}_{36}\text{H}_{45}\text{O}_3\text{P}_2$  (M+H) $^+$ : 587.2838, found 587.2840.

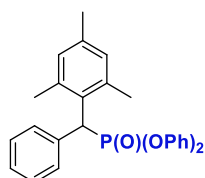

**diphenyl (mesityl(phenyl)methyl)phosphonate**. Performed according to the literature <sup>[10]</sup> with 1.0 eq. compound **5h** (0.2 mmol, 114.4 mg) and 1.2 eq. TfOH (36.0 mg) in mesitylene (0.3 ml) at 50 °C, and purified by column chromatography (petroleum ether/ethyl acetate = 5: 1) to afford 81.3 mg (0.184 mmol, 92%) of **8** as yellow oil:  $^1\text{H}$  NMR (500 MHz,  $\text{CDCl}_3$ ):  $\delta$  7.55 (d,  $J = 7.6$  Hz, 2H), 7.30 (t,  $J = 7.6$  Hz, 4H), 7.23 (d,  $J = 7.4$  Hz, 1H), 7.20-7.15 (m, 3H), 7.11-7.08 (m, 2H), 7.02-6.98 (m, 1H), 6.89 (s, 1H), 6.77 (s, 1H), 6.58-6.57 (m, 2H), 5.48 (d,  $J = 31.3$  Hz, 1H), 2.45 (s, 1H), 2.24 (d,  $J = 1.8$  Hz, 1H), 2.09 (s, 1H).  $^{13}\text{C}$  NMR (125 MHz,  $\text{CDCl}_3$ ):  $\delta$  150.4 (dd,  $J_1 = 3.5$  Hz,  $J_2 = 9.6$  Hz), 139.5 (d,  $J_{\text{C-P}} = 4.5$  Hz), 137.9 (d,  $J_{\text{C-P}} = 8.3$  Hz), 137.2 (d,  $J_{\text{C-P}} = 3.5$  Hz), 136.3, 131.2 (d,  $J_{\text{C-P}} = 3.1$  Hz), 129.9 (d,  $J_{\text{C-P}} = 6.3$  Hz), 129.7, 129.3, 129.2, 128.9 (d,  $J_{\text{C-P}} = 11.0$  Hz), 128.4, 126.6, 125.2, 124.6, 120.9 (d,  $J_{\text{C-P}} = 4.3$  Hz), 120.1 (d,  $J_{\text{C-P}} = 4.4$  Hz), 44.87 (d,  $J_{\text{C-P}} = 141.8$  Hz), 21.5, 21.4, 20.7.  $^{31}\text{P}$  NMR (203 MHz,  $\text{CDCl}_3$ ):  $\delta$  19.15. HRMS calc. for  $\text{C}_{28}\text{H}_{28}\text{O}_3\text{P}$  (M+Na) $^+$ : 443.1771, found 443.1766.

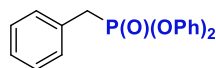

**diphenyl benzylphosphonate**. Performed according to the literature <sup>[11]</sup> with 1.0 eq. compound **5h** (0.2 mmol, 114.4 mg) and TMSI (0.8 mmol, 160.1 mg, 4.0 eq.) in MeCN (2.0 ml) at r.t, and purified by column chromatography (petroleum ether/ethyl acetate = 5: 1) to afford 56.4 mg (0.174 mmol, 87%) of **9** as brown oil:  $^1\text{H}$  NMR (500 MHz,  $\text{CDCl}_3$ ):  $\delta$  7.39-7.28 (m, 5H), 7.26 (t,  $J = 7.8$  Hz, 4H), 7.14-7.11 (m, 2H), 7.04-7.02 (m, 4H), 3.50 (d,  $J = 21.7$  Hz, 2H).  $^{13}\text{C}$  NMR (125 MHz,  $\text{CDCl}_3$ ):  $\delta$  150.3 (d,  $J_{\text{C-P}} = 9.2$  Hz), 130.2 (d,  $J_{\text{C-P}} = 9.4$  Hz), 130.0 (d,  $J_{\text{C-P}} = 7.1$  Hz), 129.6, 128.7 (d,  $J_{\text{C-P}} = 3.4$  Hz), 127.3 (d,  $J_{\text{C-P}} = 3.7$  Hz), 125.1, 120.5 (d,  $J_{\text{C-P}} = 4.3$  Hz), 33.8 (d,  $J_{\text{C-P}} = 138.5$  Hz).  $^{31}\text{P}$  NMR (203 MHz,  $\text{CDCl}_3$ ):  $\delta$  19.55. HRMS calc. for  $\text{C}_{19}\text{H}_{18}\text{O}_3\text{P}$  (M+Na) $^+$ : 325.0988, found 325.0984.



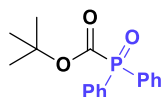

**tert-butyl (diphenylphosphoryl)formate.** Performed according to the general procedure (conditions A, 43.7 mg of **1t**, 121.2 mg of diphenylphosphine oxide **2a** and 4.9 mg of DMAP), and purified by column chromatography (petroleum ether/ethyl acetate = 6: 1) to afford 28.4 mg (0.094 mmol, 47%) of **10** as colorless oil:  $^1\text{H}$  NMR (500 MHz,  $\text{CDCl}_3$ ):  $\delta$  7.88-7.84 (m, 4H), 7.60-7.57 (m, 2H), 7.52-7.48 (m, 4H), 1.53 (d,  $J = 0.5$  Hz, 9H).  $^{13}\text{C}$  NMR (125 MHz,  $\text{CDCl}_3$ ):  $\delta$  169.9 (d,  $J_{\text{C-P}} = 143.9$  Hz), 132.6 (d,  $J_{\text{C-P}} = 2.7$  Hz), 131.7 (d,  $J_{\text{C-P}} = 9.9$  Hz), 129.3 (d,  $J_{\text{C-P}} = 100.6$  Hz), 128.6 (d,  $J_{\text{C-P}} = 12.6$  Hz), 86.2 (d,  $J_{\text{C-P}} = 4.0$  Hz), 28.1.  $^{31}\text{P}$  NMR (203 MHz,  $\text{CDCl}_3$ ):  $\delta$  15.40. HRMS calc. for  $\text{C}_{17}\text{H}_{19}\text{O}_3\text{PNa}$  ( $\text{M}+\text{Na}$ ) $^+$ : 325.0964, found 325.0959.

## 7. Reference

1. Liu, N.; Mao, L. L.; Yang, B.; Yang, S. D. *Chem. Commun.* **2014**, *50*, 10879-10882.
2. King, A. K.; Buchard, A.; Mahon, M. F.; Webster, R. L. *Chem. Eur. J.* **2015**, *21*, 15960-15963.
3. Zhang, D.; Lian, M.; Liu, J.; Tang, S.; Liu, G.; Ma, C.; Meng, Q.; Peng, H.; Zhu, D. *Org. Lett.* **2019**, *21*, 2597-2601.
4. Frey, G.; Lesiecki, H.; Lindner, E.; Vordermaier, G. *Chem. Ber.* **1979**, *112*, 763-772.
5. Lesiecki, H.; Lindner, E.; Vordermaier, G. *Chem. Ber.* **1979**, *112*, 793-798.
6. Lindner, E.; Ebert, H.-D.; Geihell, K.; Haag, A. *Chem. Ber.* **1979**, *104*, 3121-3130.
7. Davidson, R. S.; Sheldon, R. A. Trippett, S. *J. Chem. Soc.(C)*, **1966**, 1700-1703.
8. Lindner, E.; Hiibner, D. *Chem. Ber.* **1983**, *116*, 2574-2590.
9. Keglevich, G.; Gr̃un, A.; Moln ́, I. G.; Greiner, I. *Heteroatom Chem.* **2011**, *22*, 640-648.
10. Pallikonda, G.; Chakravarty, M. *J. Org. Chem.* **2016**, *81*, 2135-2142.
11. Zhu, Q.; Tremblay, M. S. *Bioorg. Med. Chem. Lett.* **2006**, *16*, 6170-6172.



## 8. Charts of compounds

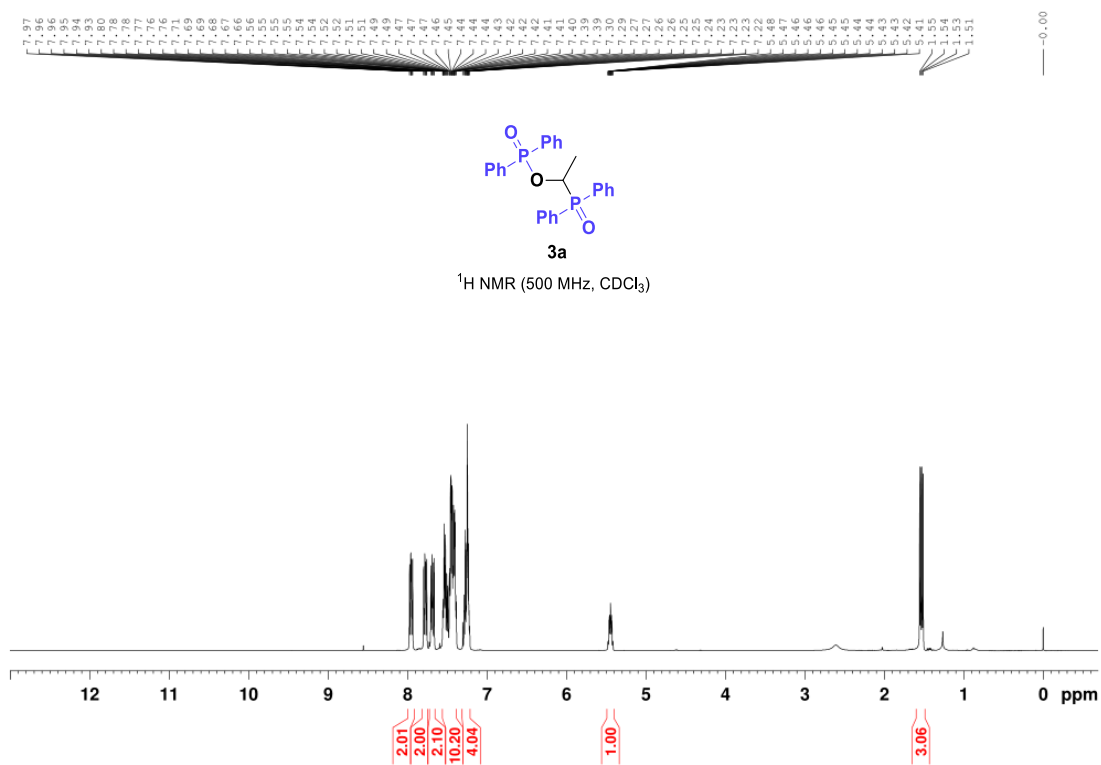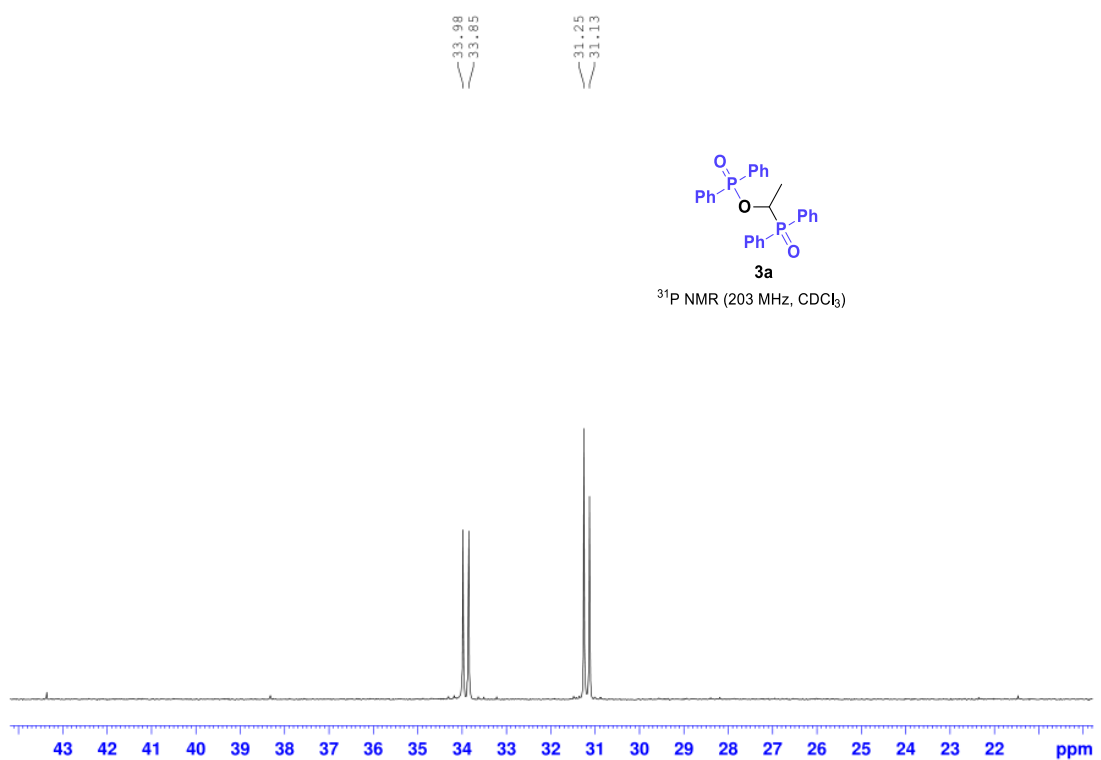

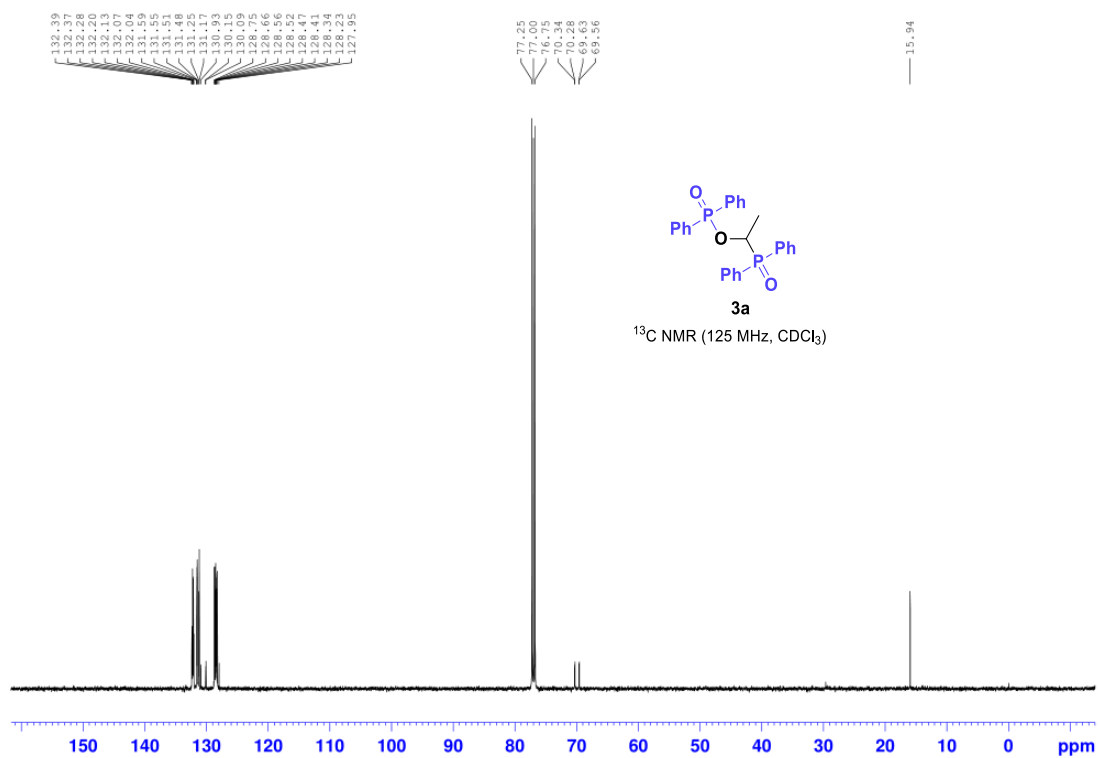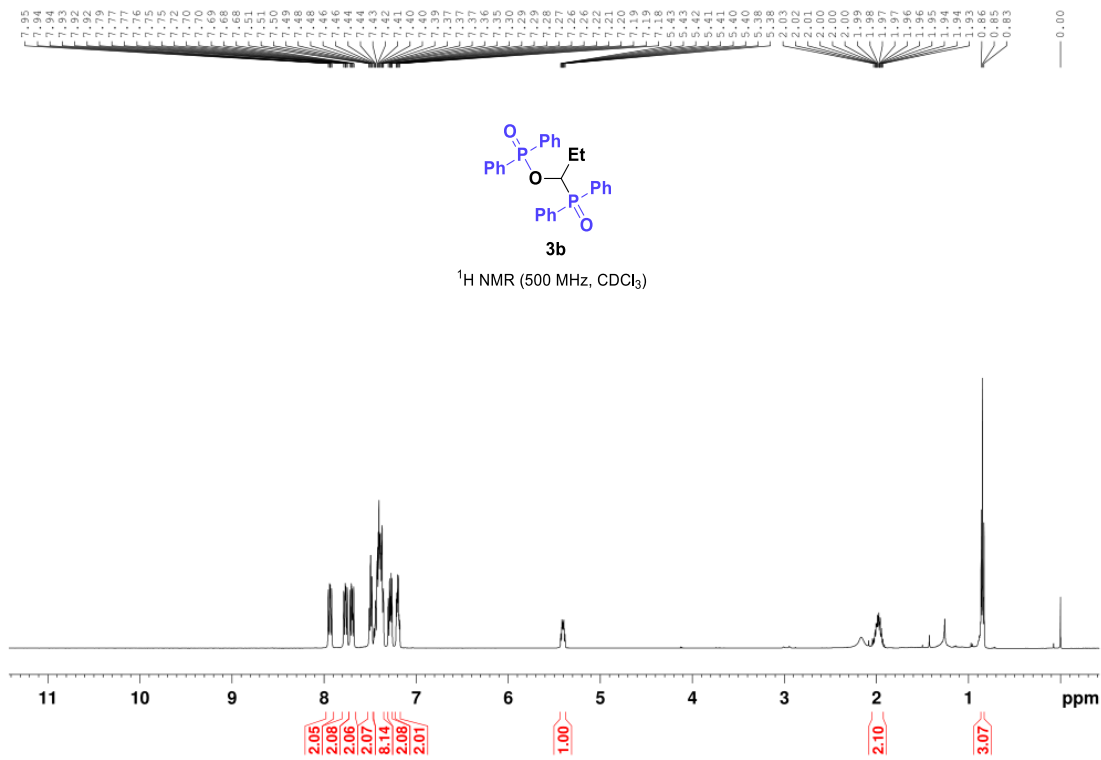

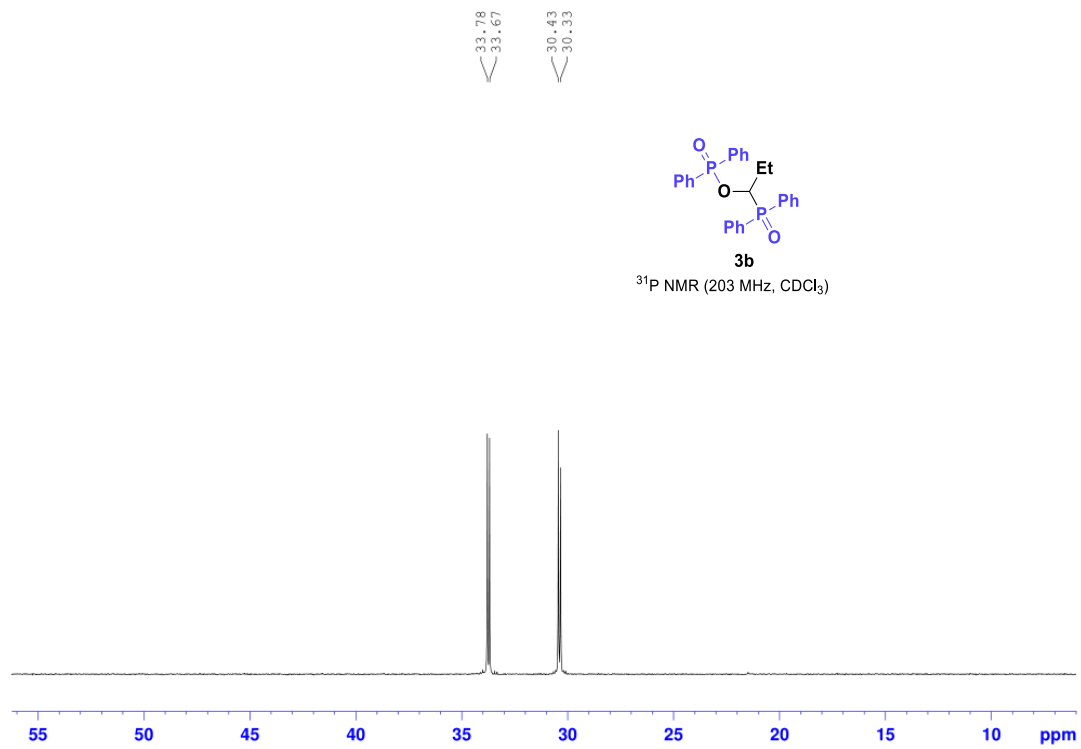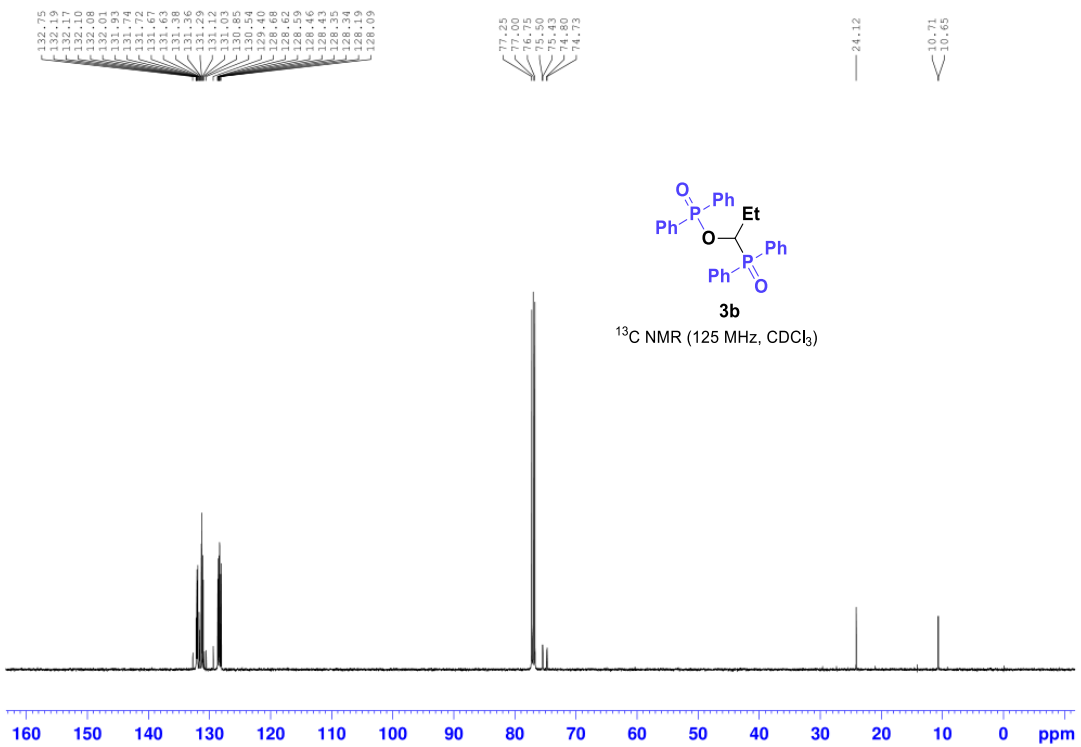

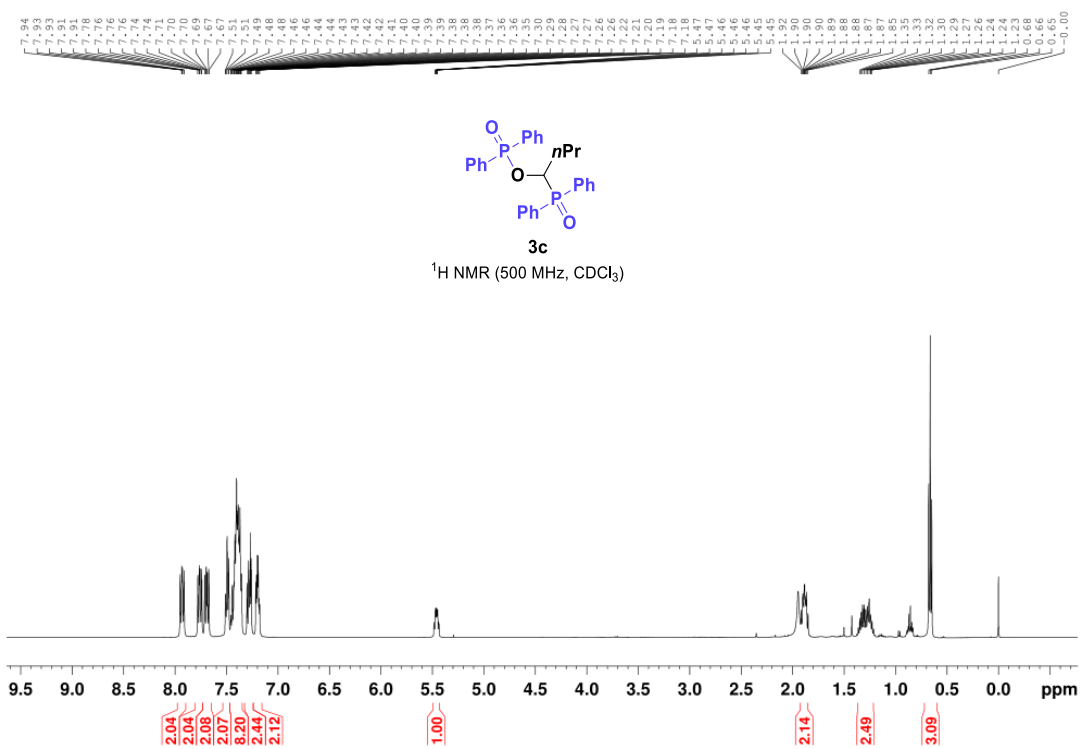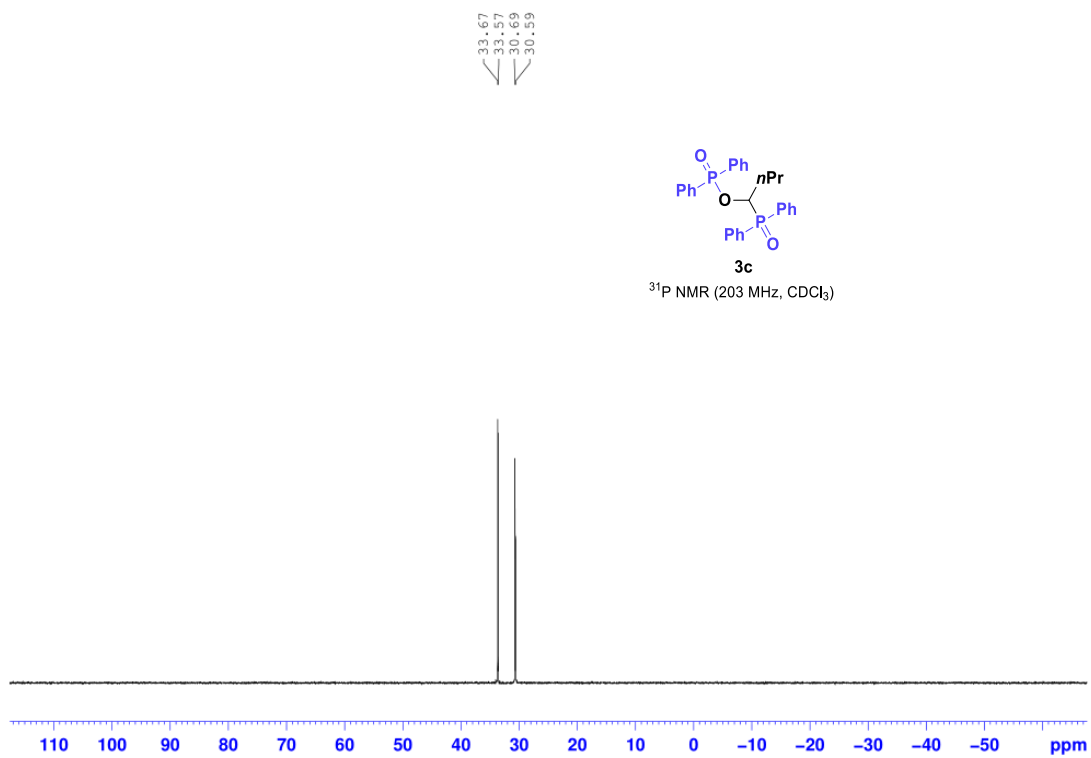

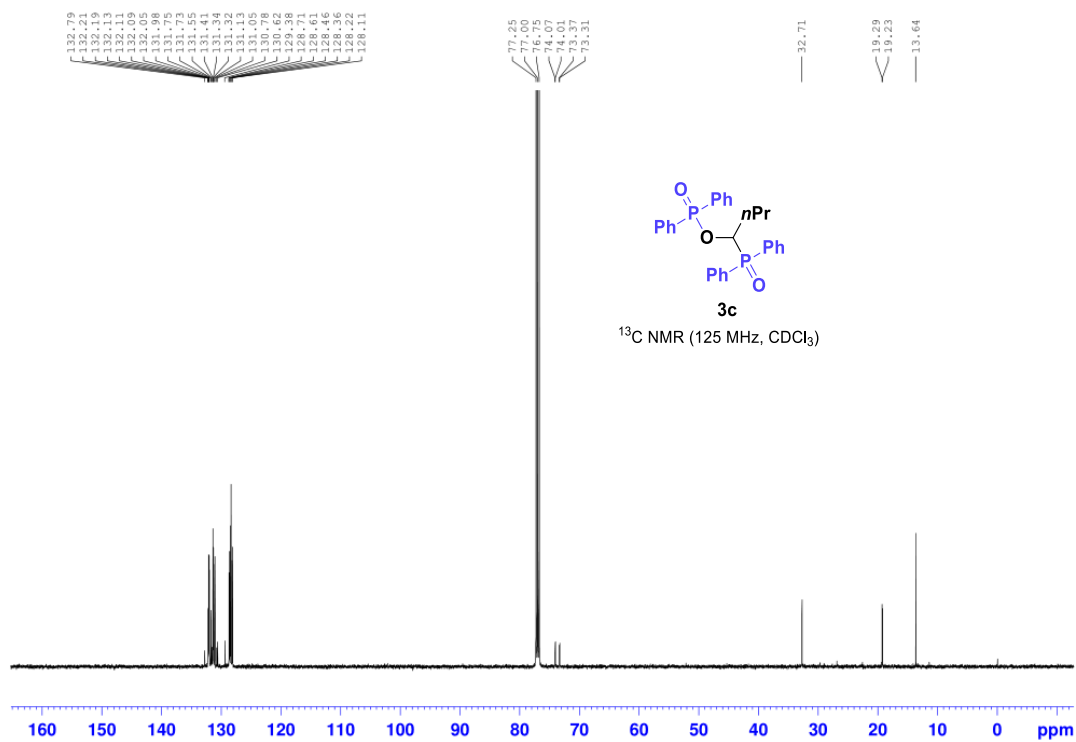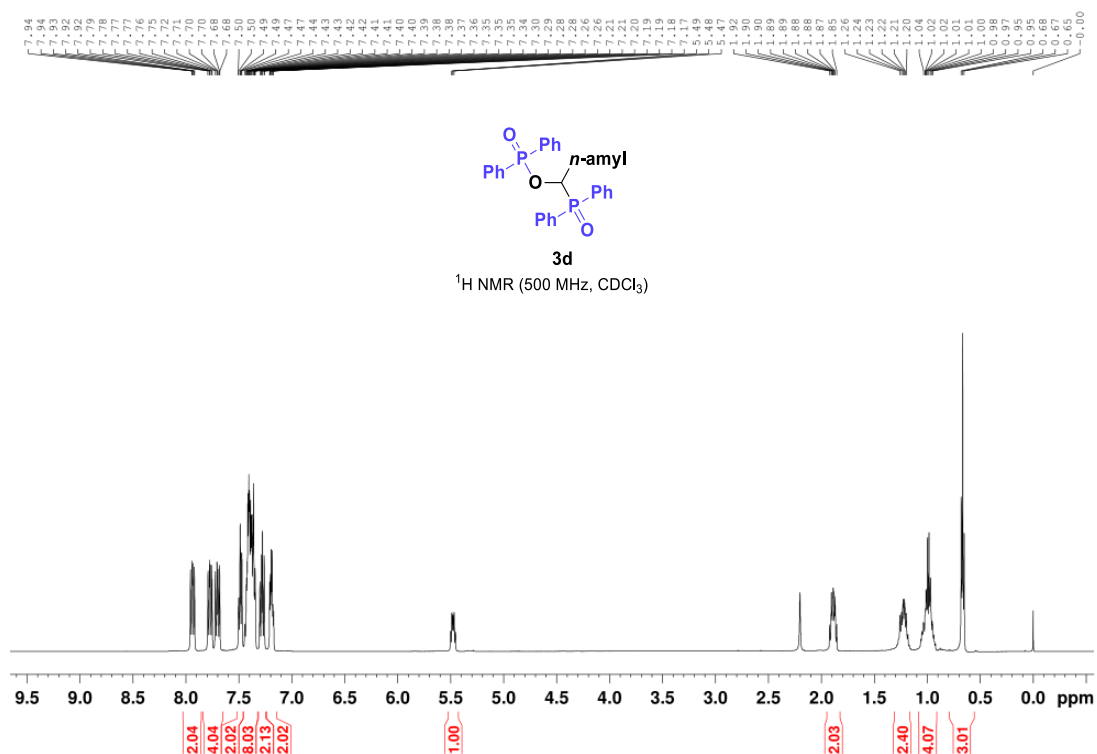

33.60  
33.50  
30.55  
30.45

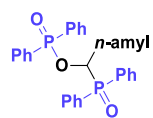

**3d**

<sup>31</sup>P NMR (203 MHz, CDCl<sub>3</sub>)

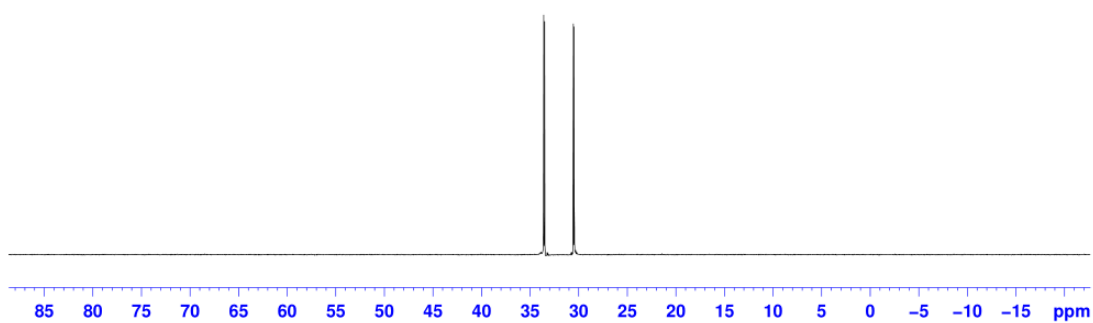

132.86  
132.15  
132.11  
132.07  
132.05  
131.94  
131.80  
131.67  
131.56  
131.40  
131.36  
131.22  
131.04  
130.96  
130.78  
129.78  
129.41  
128.65  
128.63  
128.46  
128.30  
128.15  
128.04

77.05  
77.00  
76.74  
74.19  
74.13  
73.83

31.20  
30.49  
25.57  
25.51  
21.99  
13.69

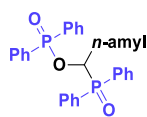

**3d**

<sup>13</sup>C NMR (125 MHz, CDCl<sub>3</sub>)

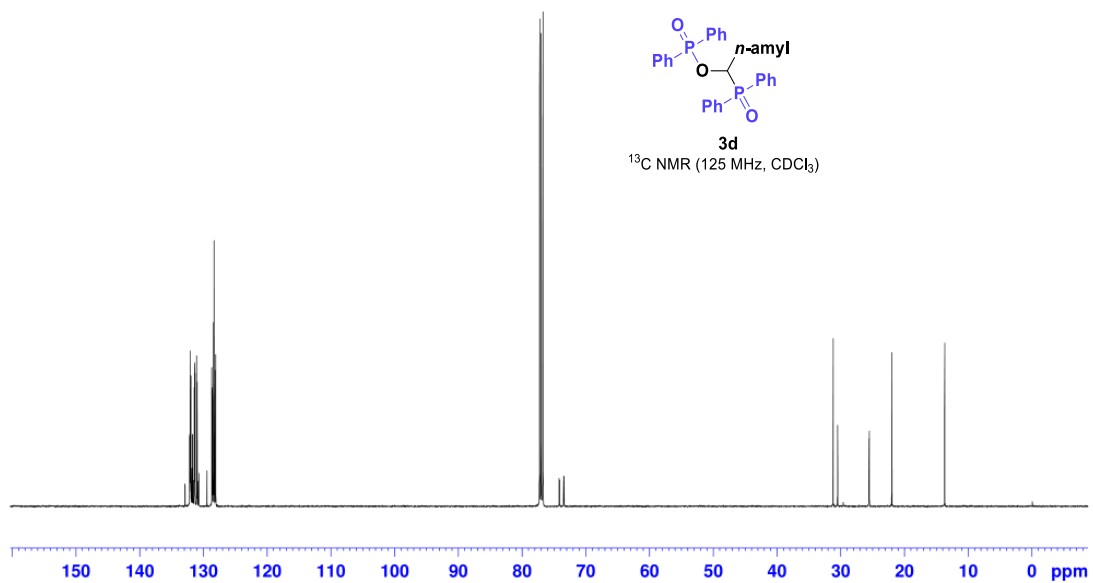

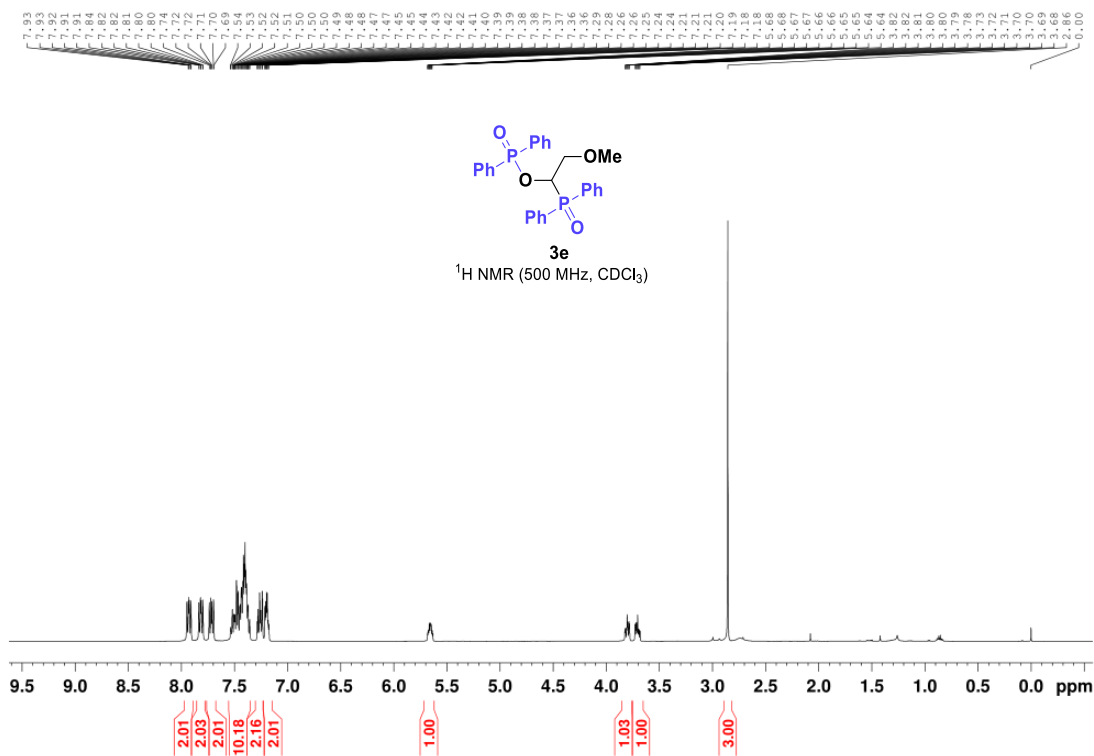

34.98  
34.88  
28.79  
28.69

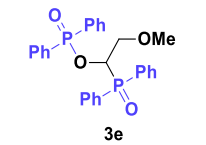

$^{31}\text{P NMR (203 MHz, CDCl}_3)$

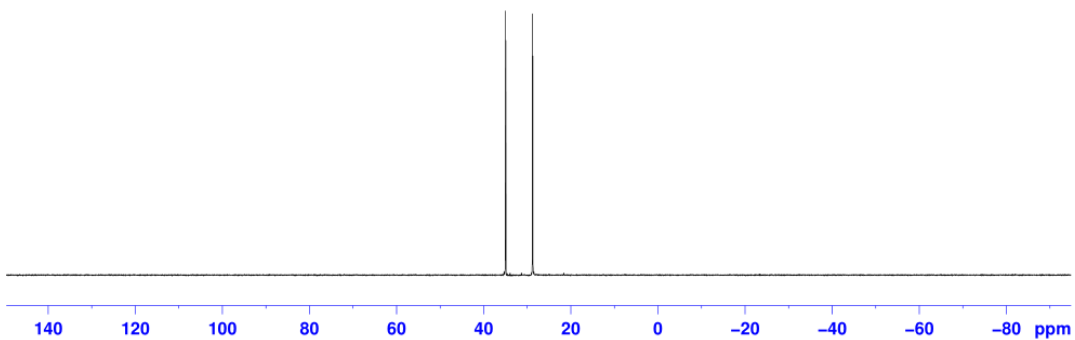

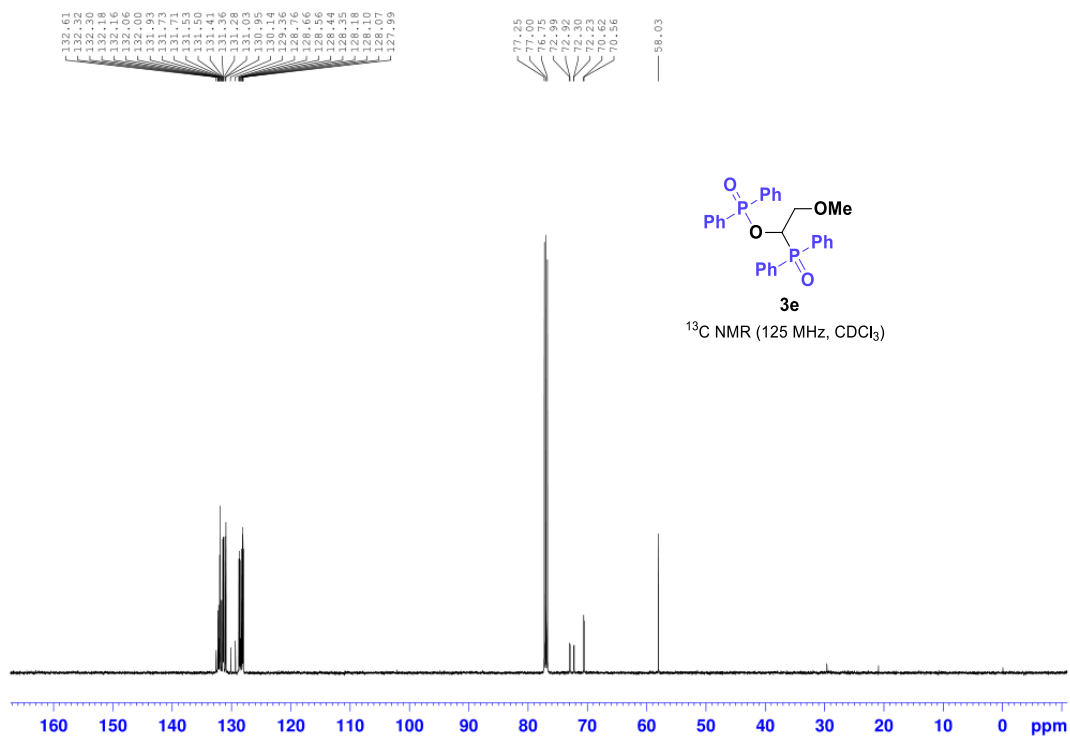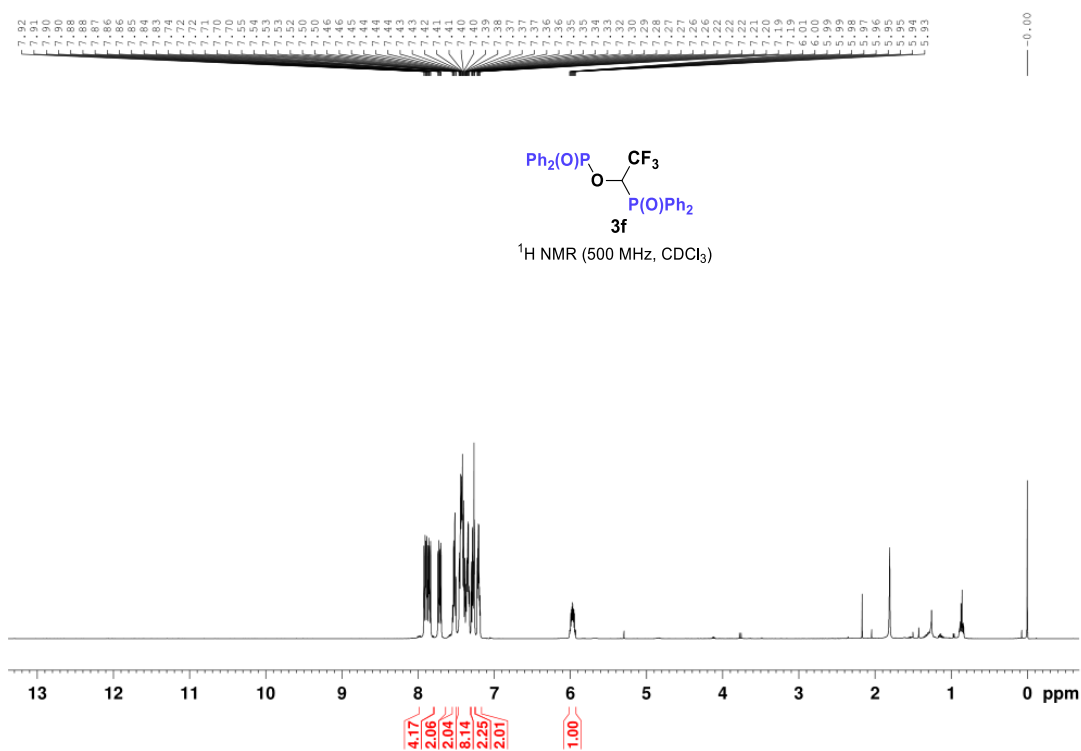



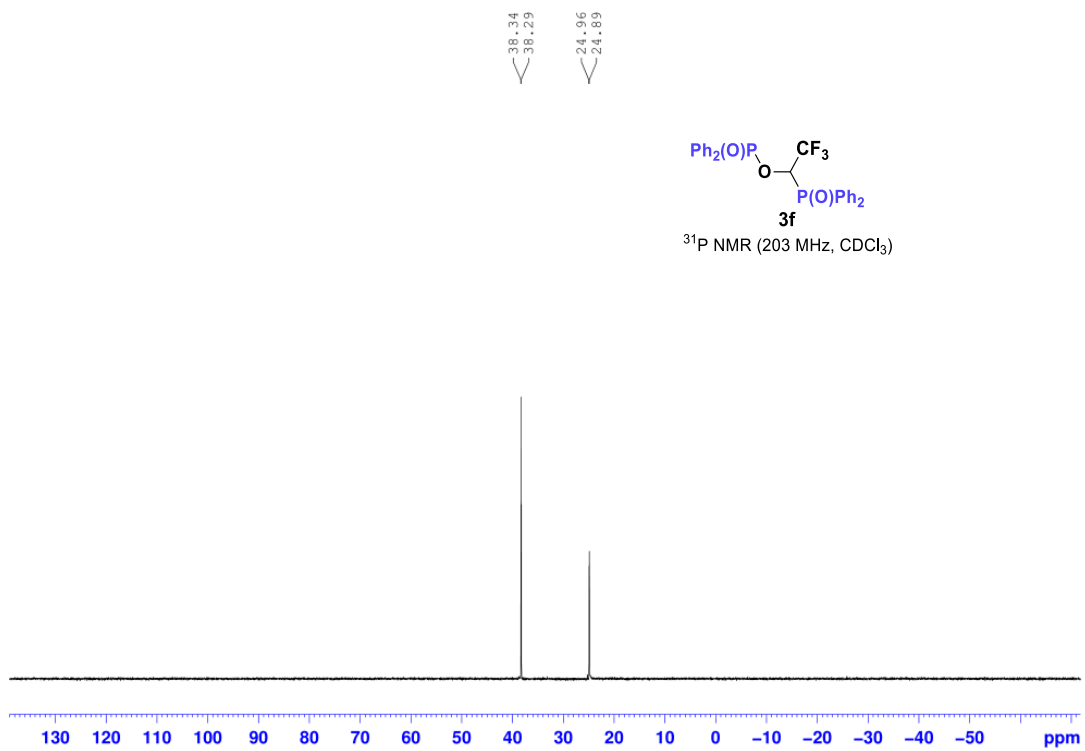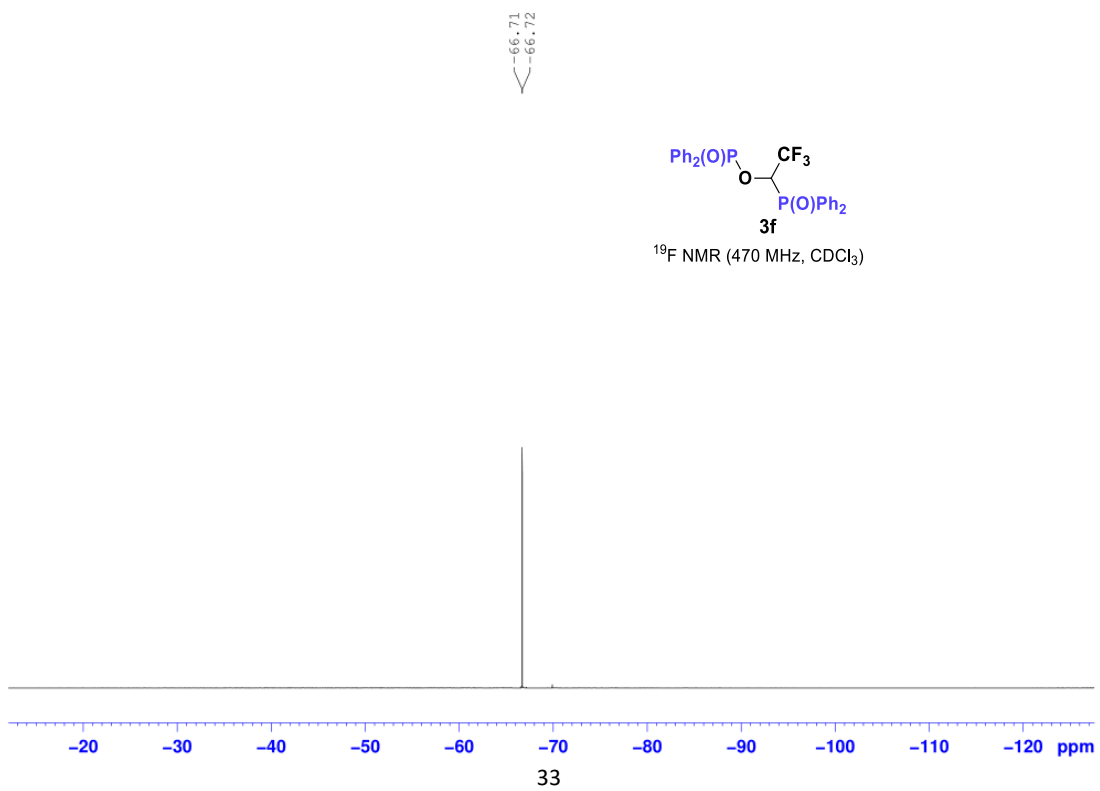

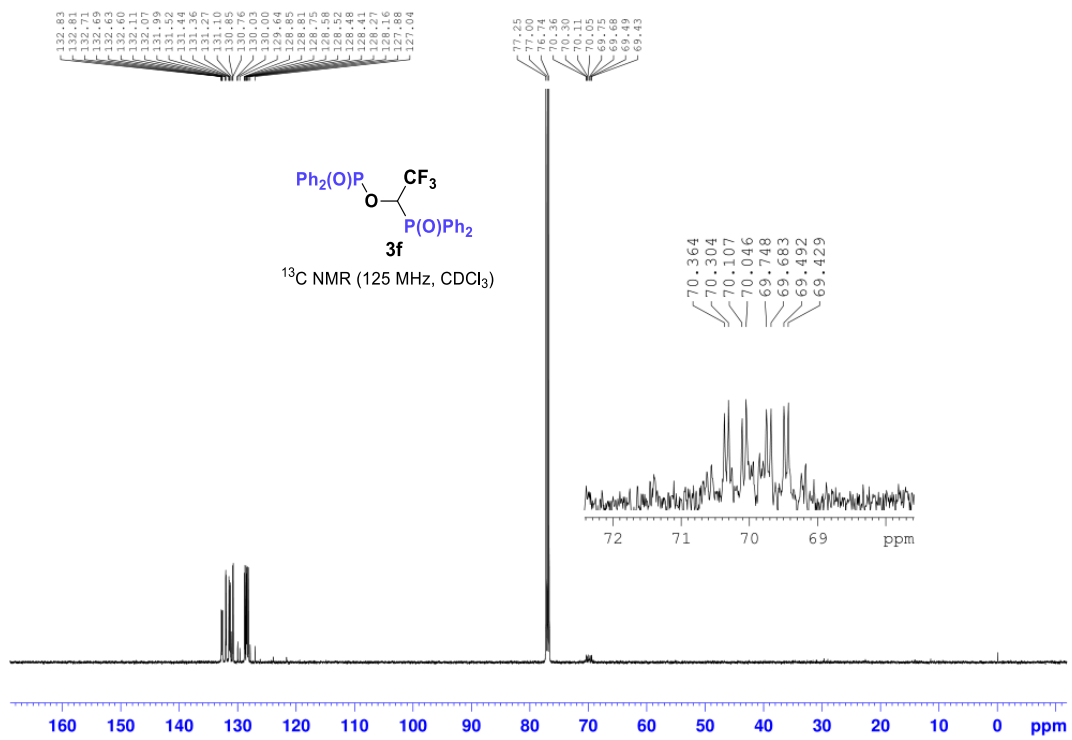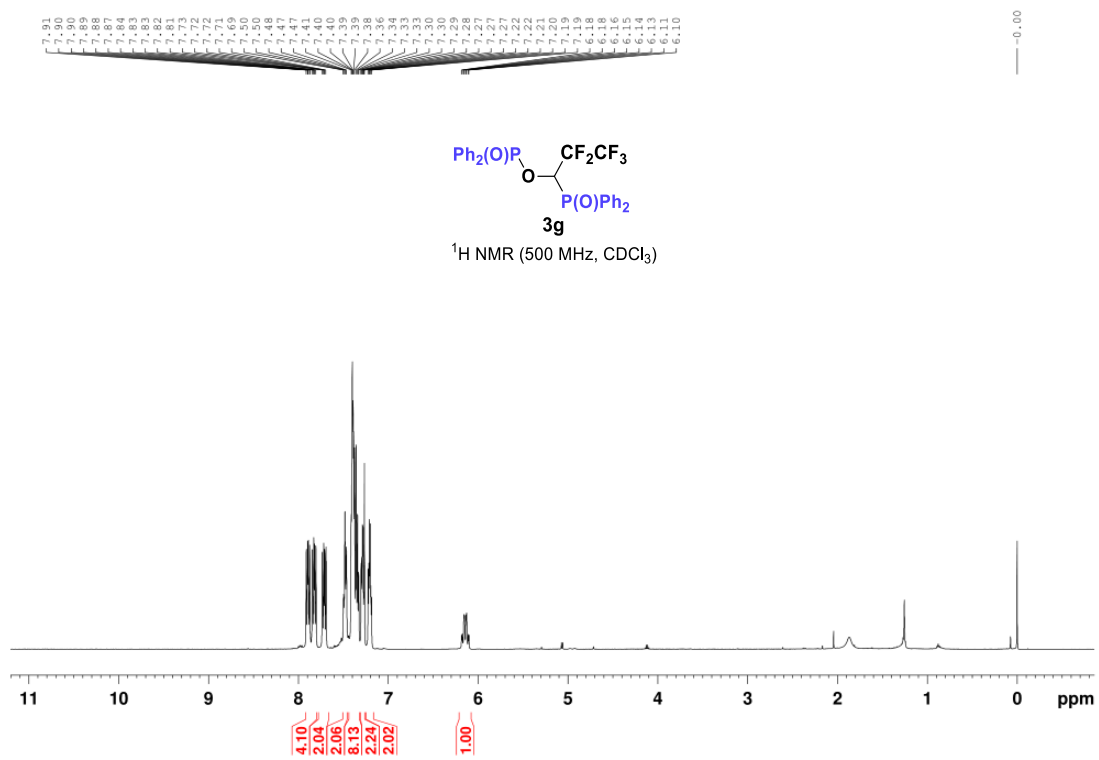

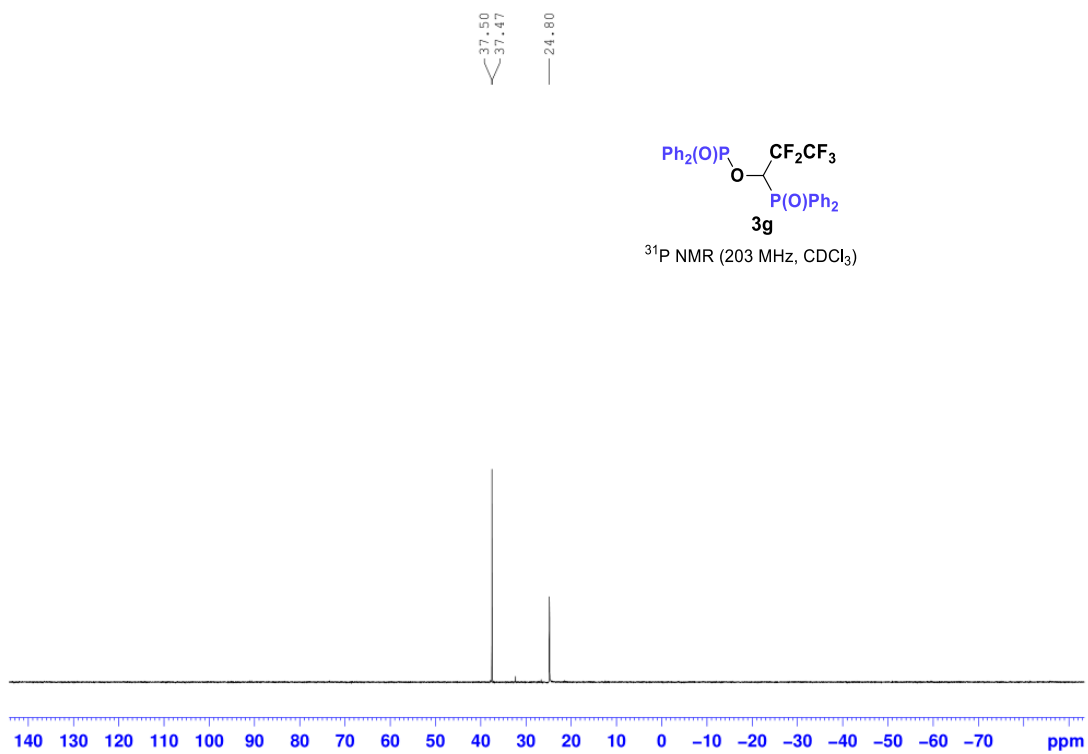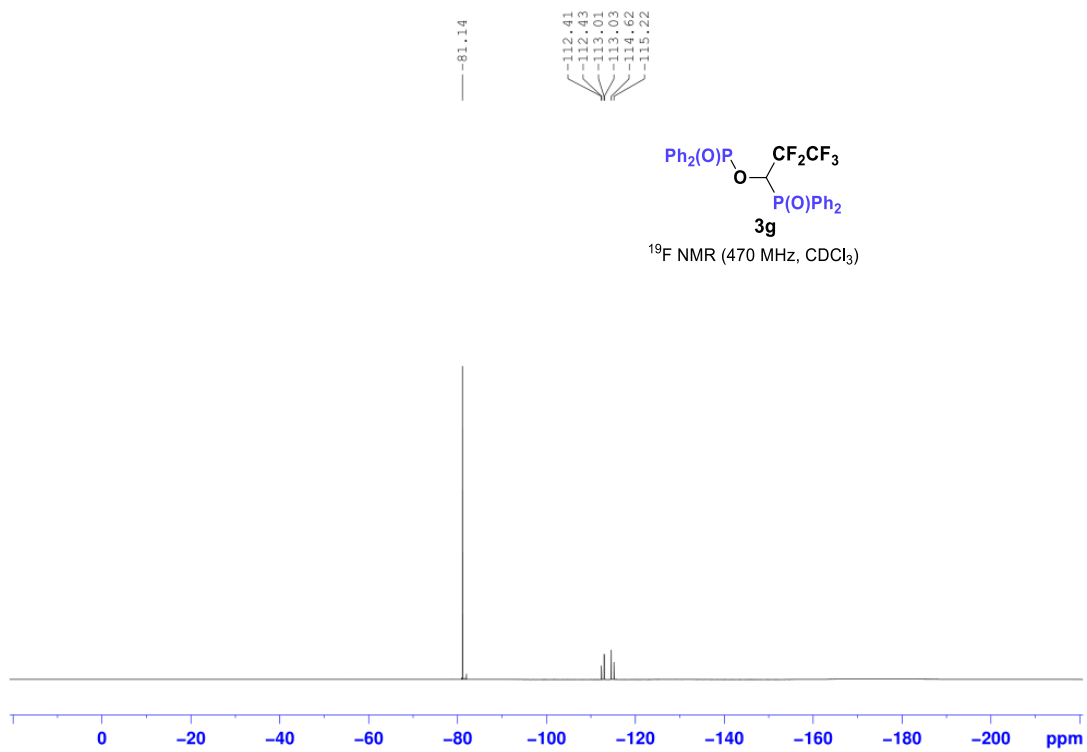

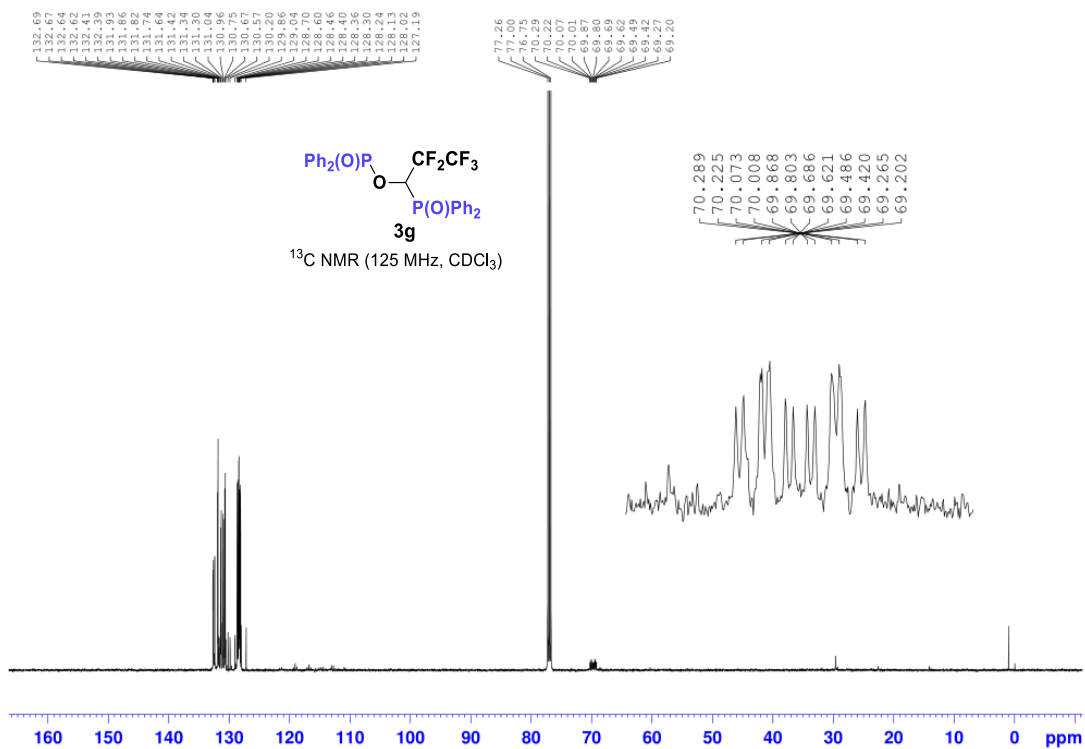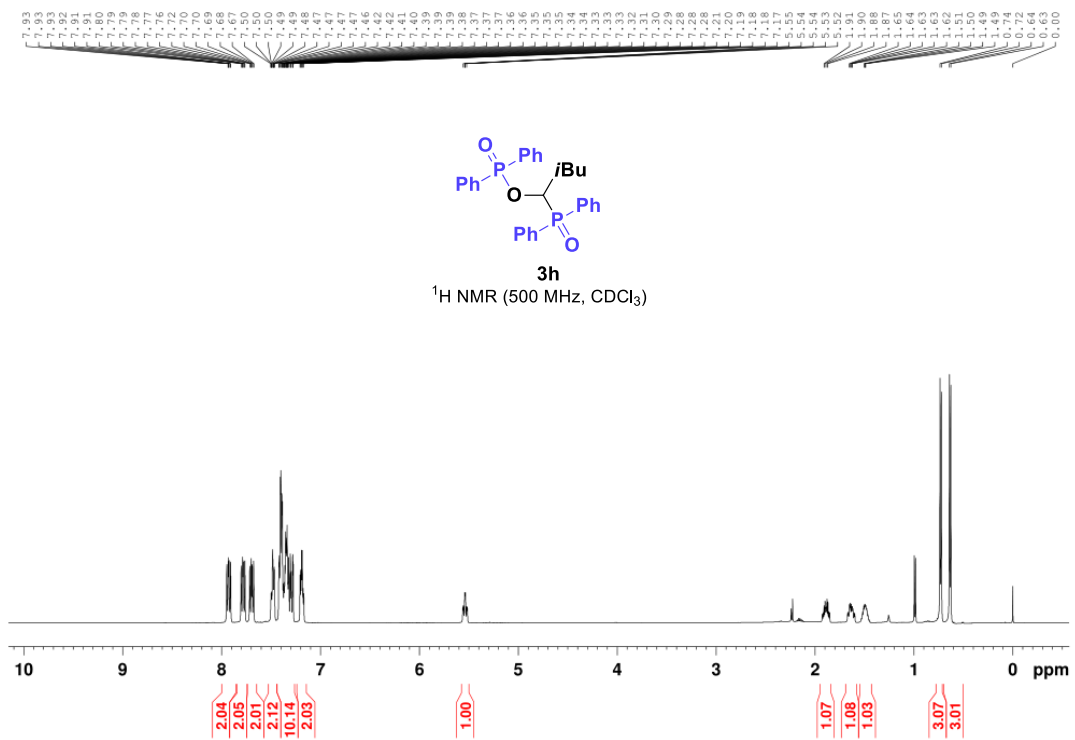

33.46  
33.38  
31.16  
31.07

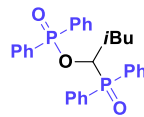

**3h**

<sup>31</sup>P NMR (203 MHz, CDCl<sub>3</sub>)

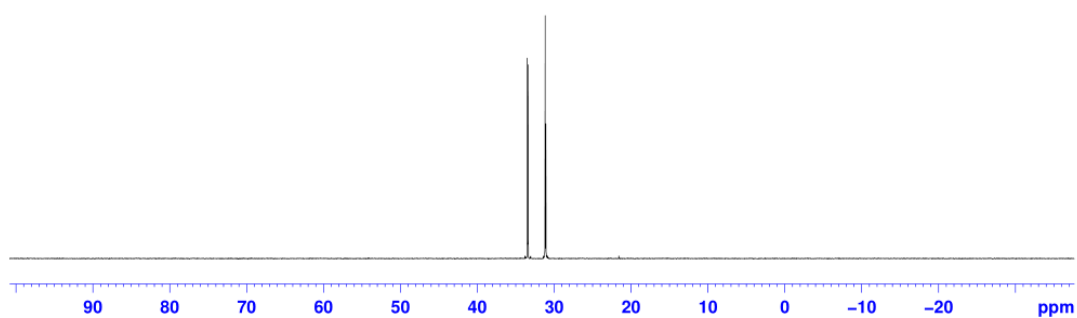

132.95  
132.09  
132.05  
132.03  
132.01  
131.84  
131.84  
131.62  
131.59  
131.39  
131.39  
131.32  
131.26  
131.02  
130.83  
130.83  
130.55  
129.20  
128.57  
128.57  
128.41  
128.38  
128.13  
128.13  
128.03

72.70  
72.00  
71.83

39.26

24.60  
24.53  
21.20

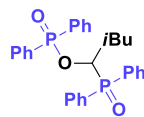

**3h**

<sup>13</sup>C NMR (125 MHz, CDCl<sub>3</sub>)

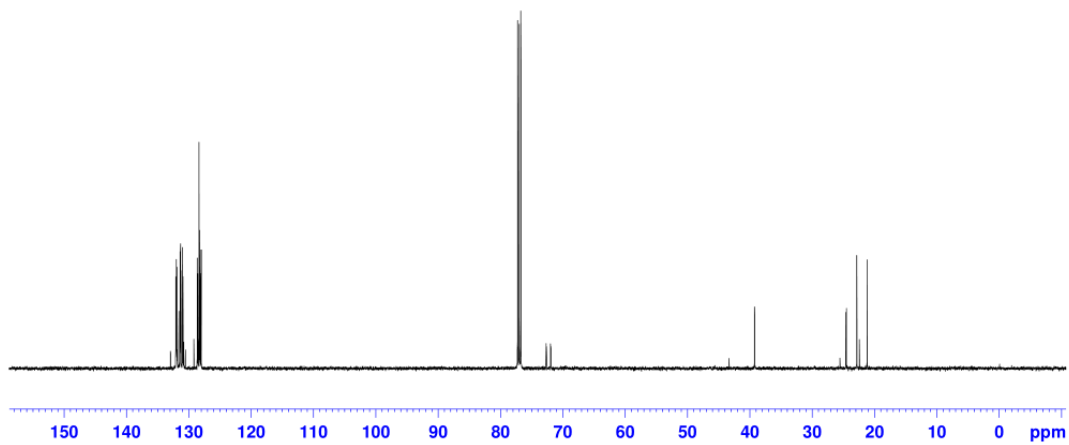

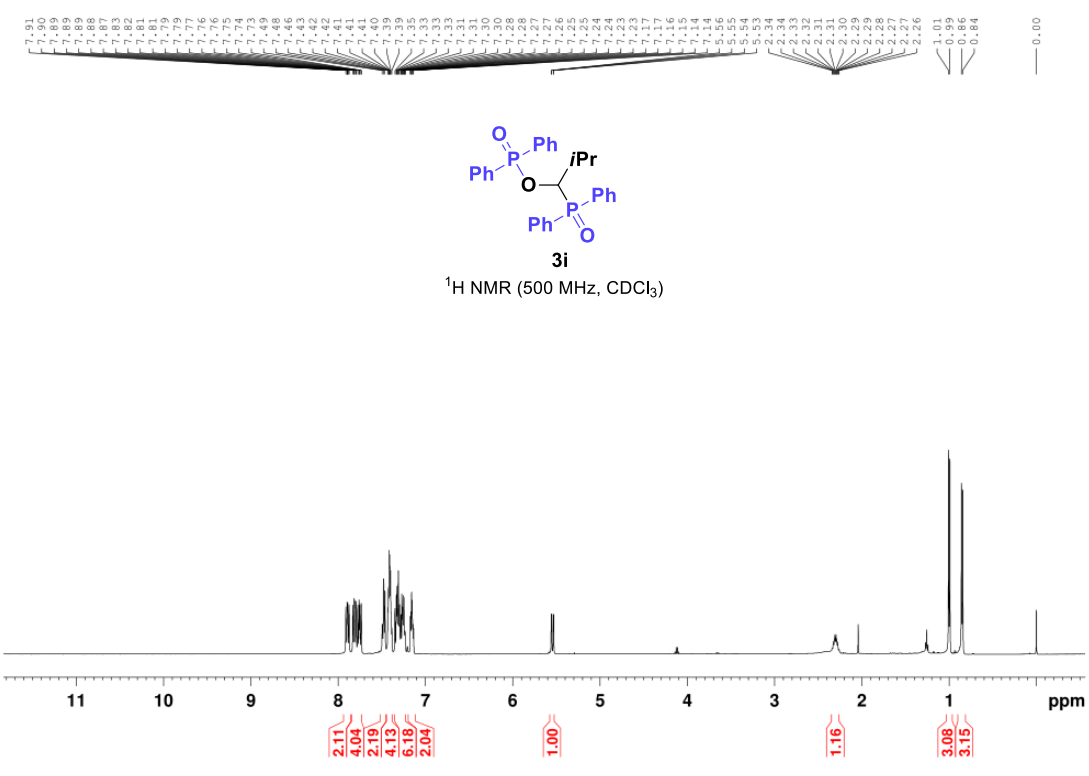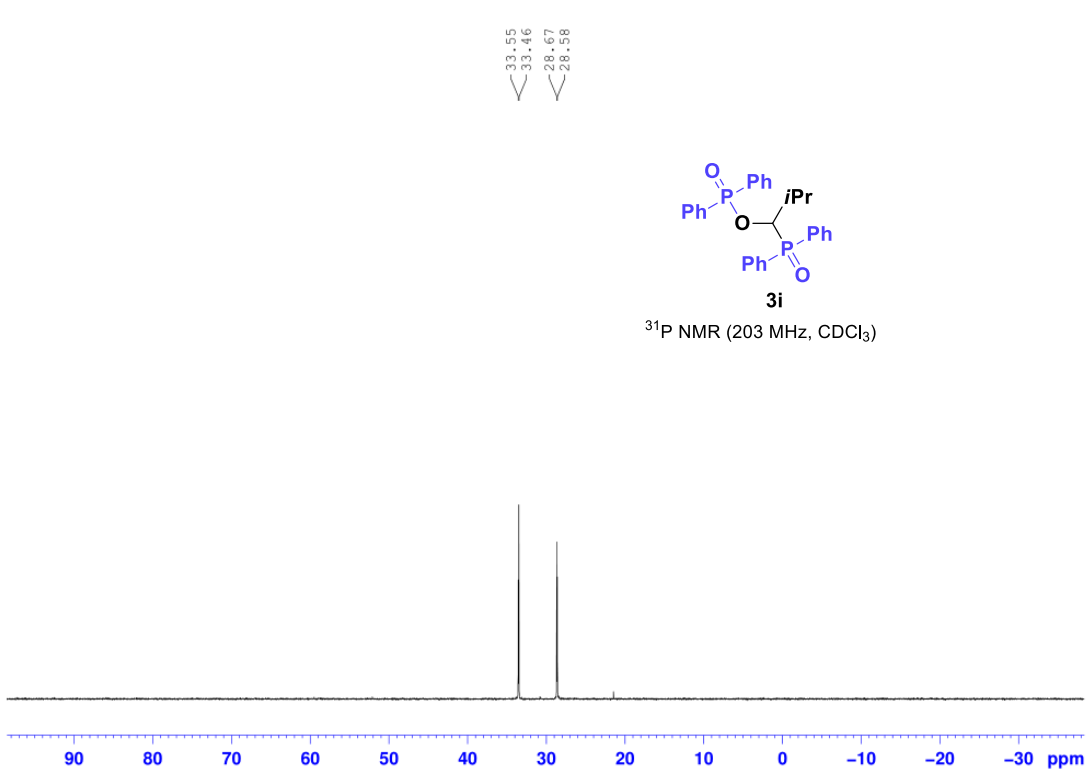

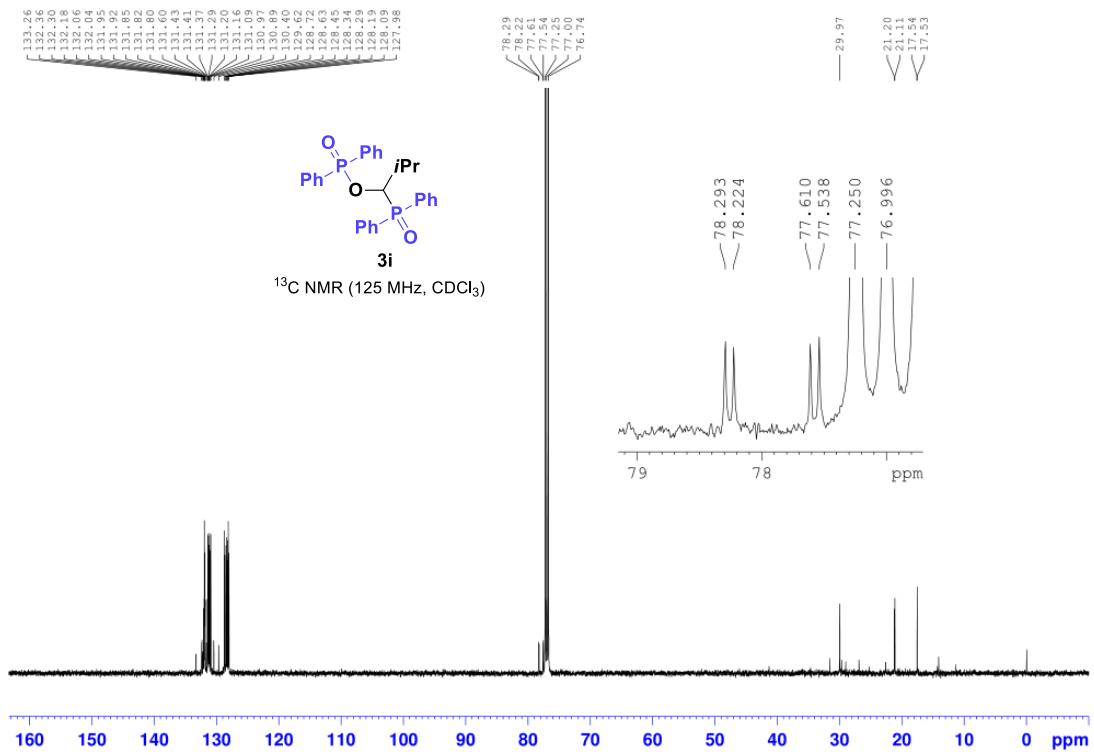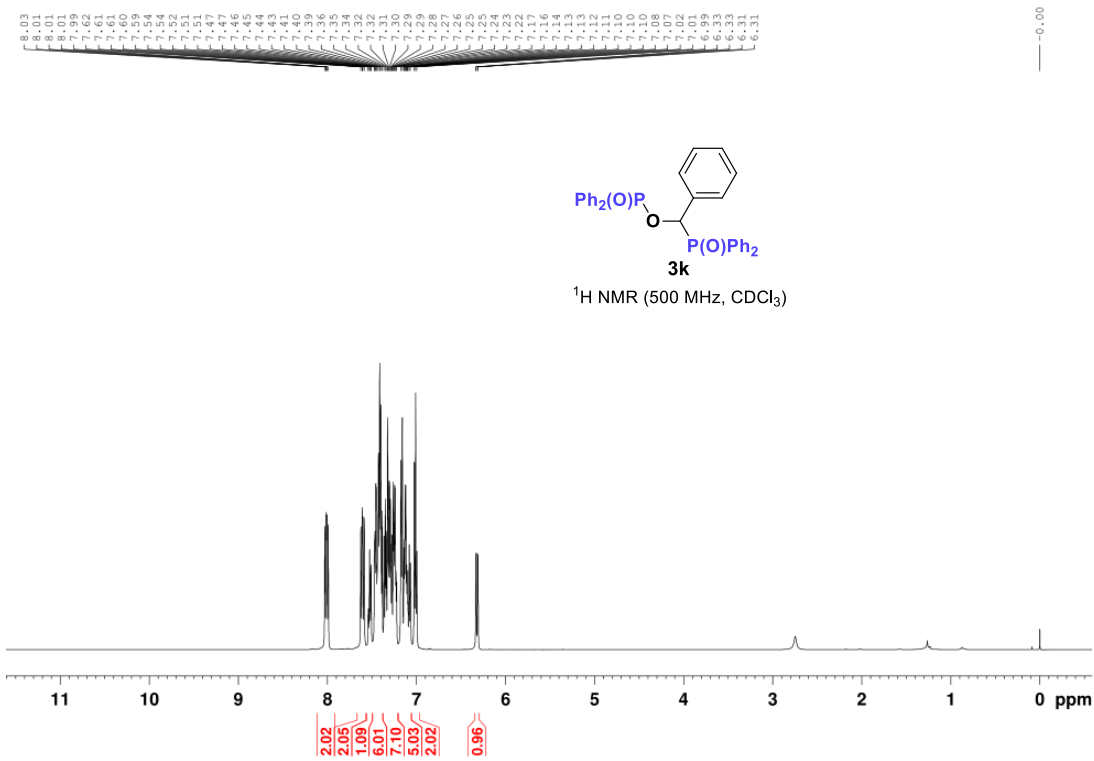

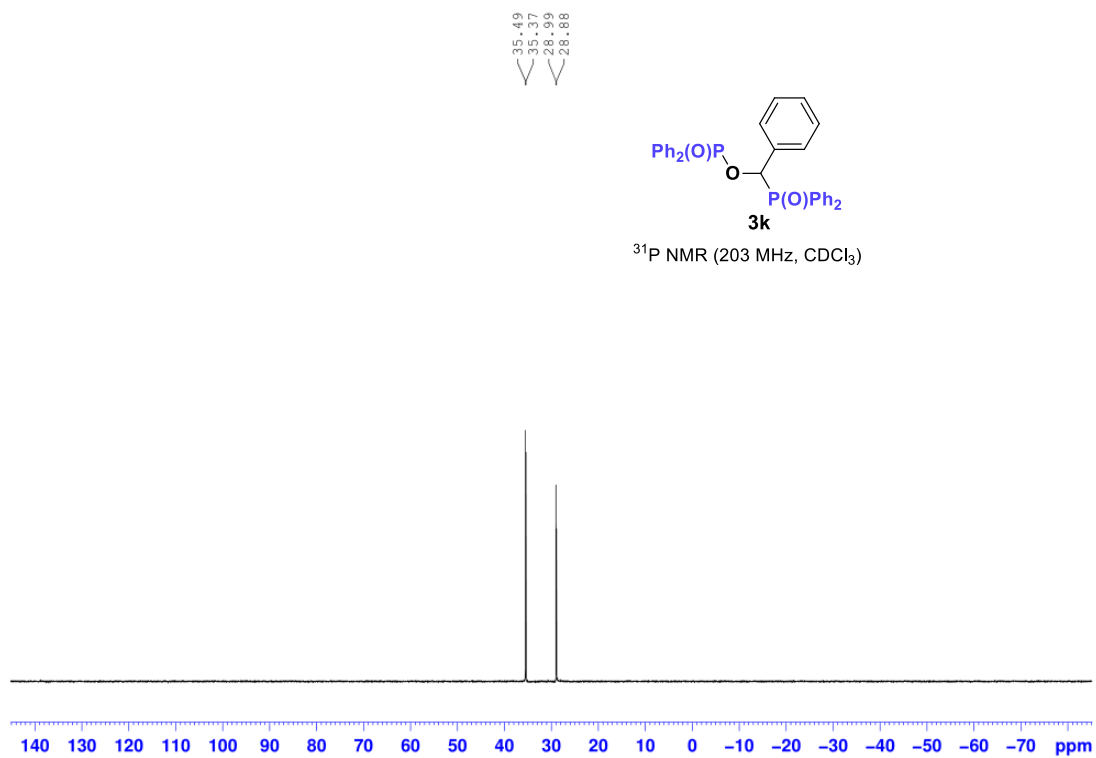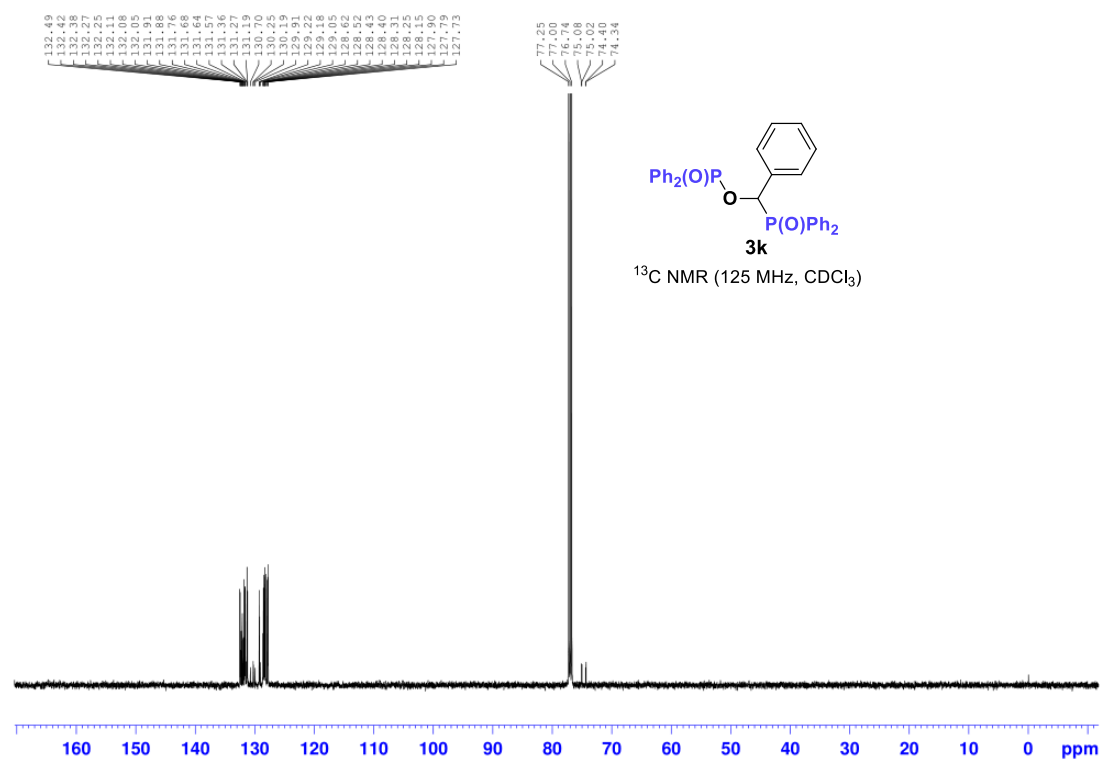



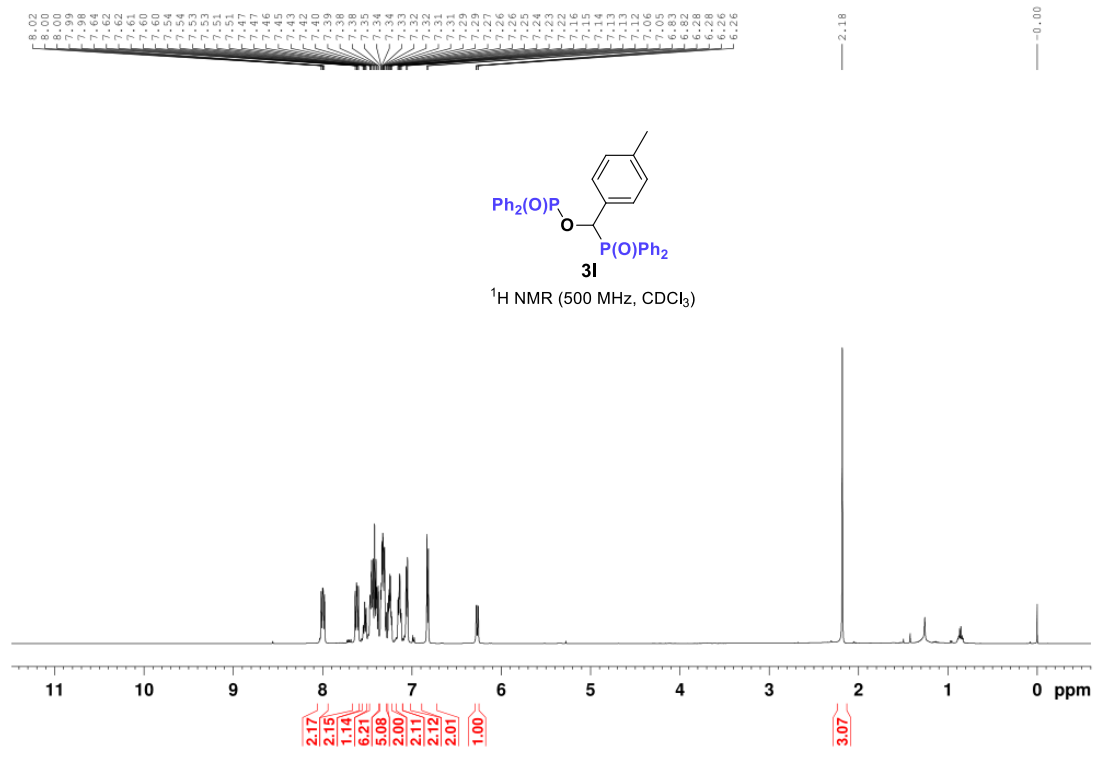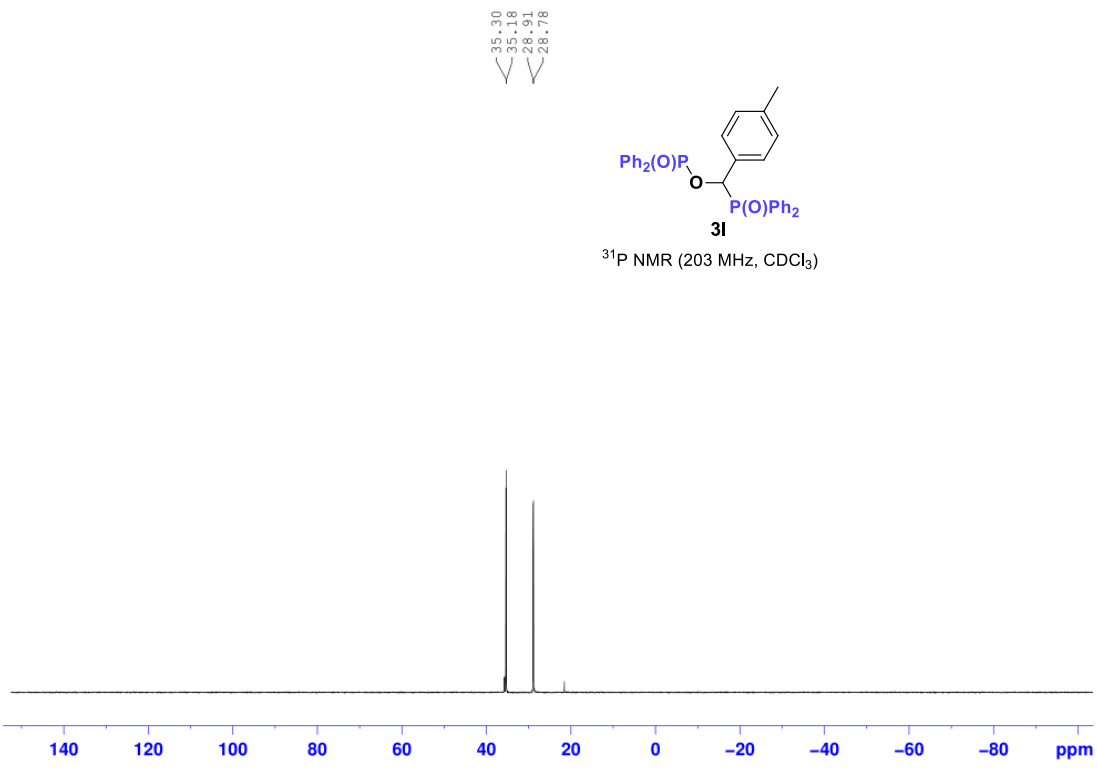

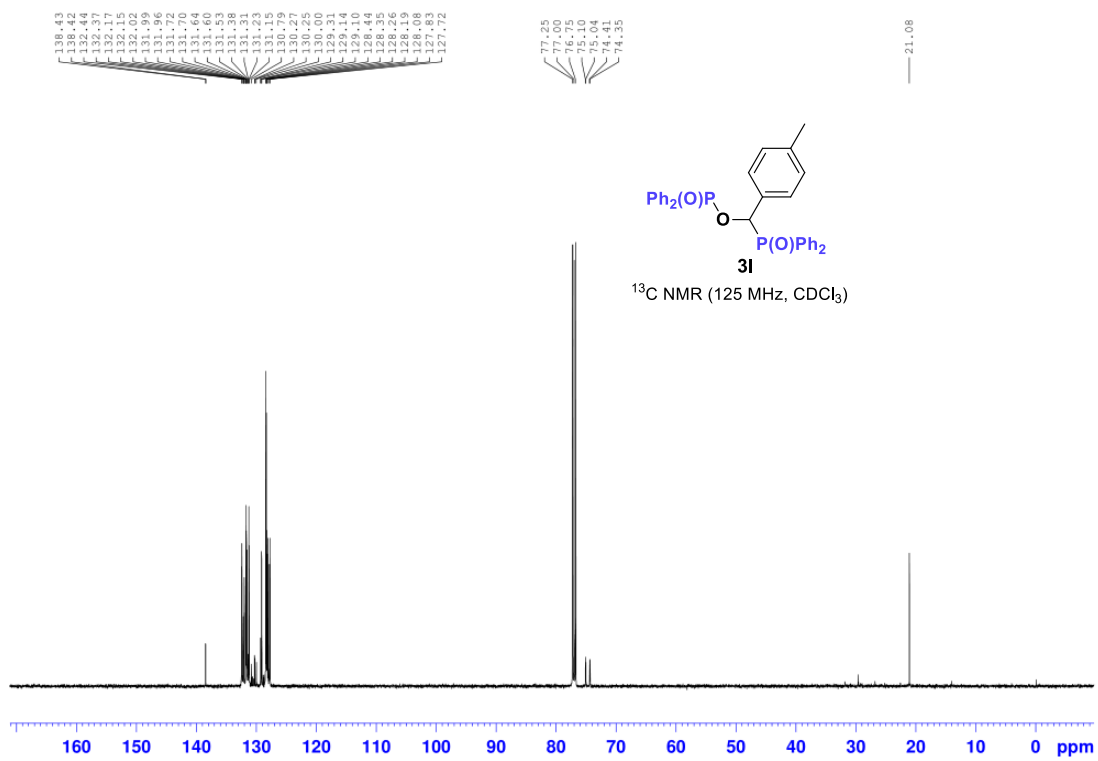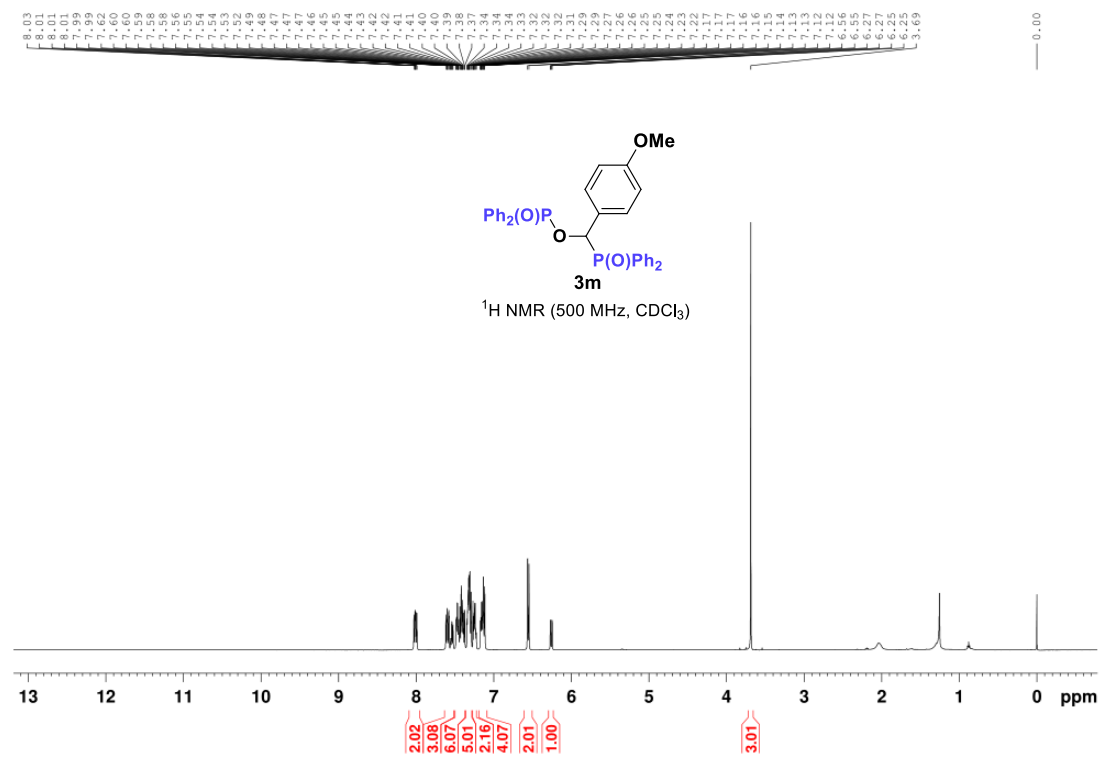

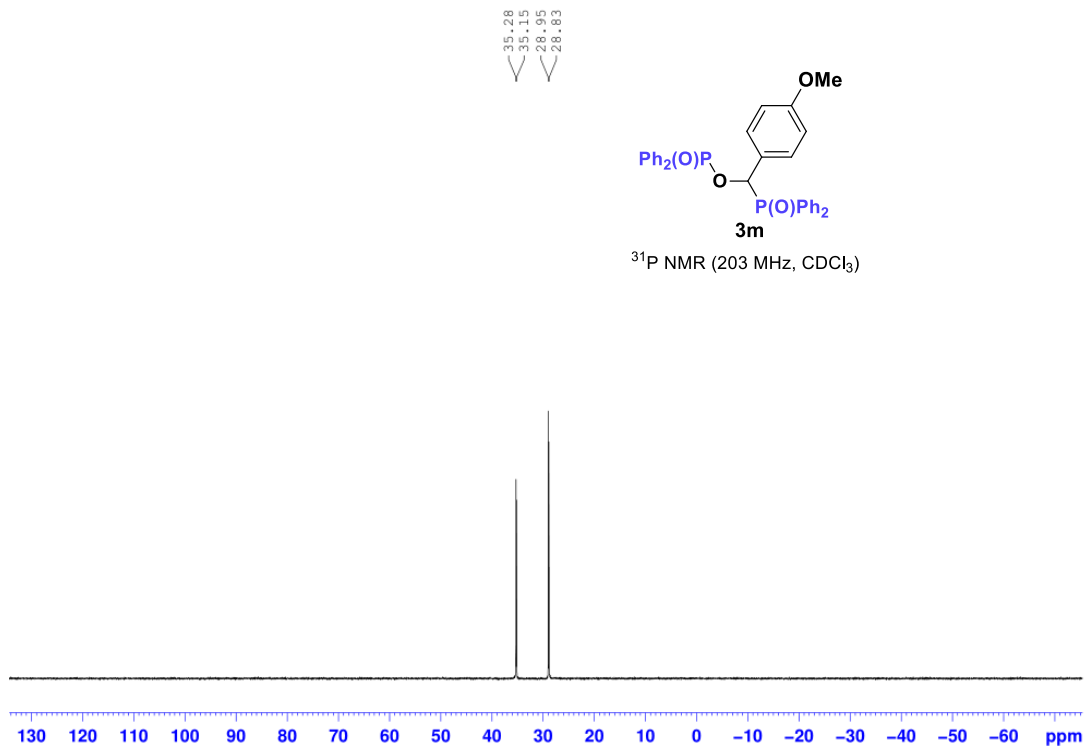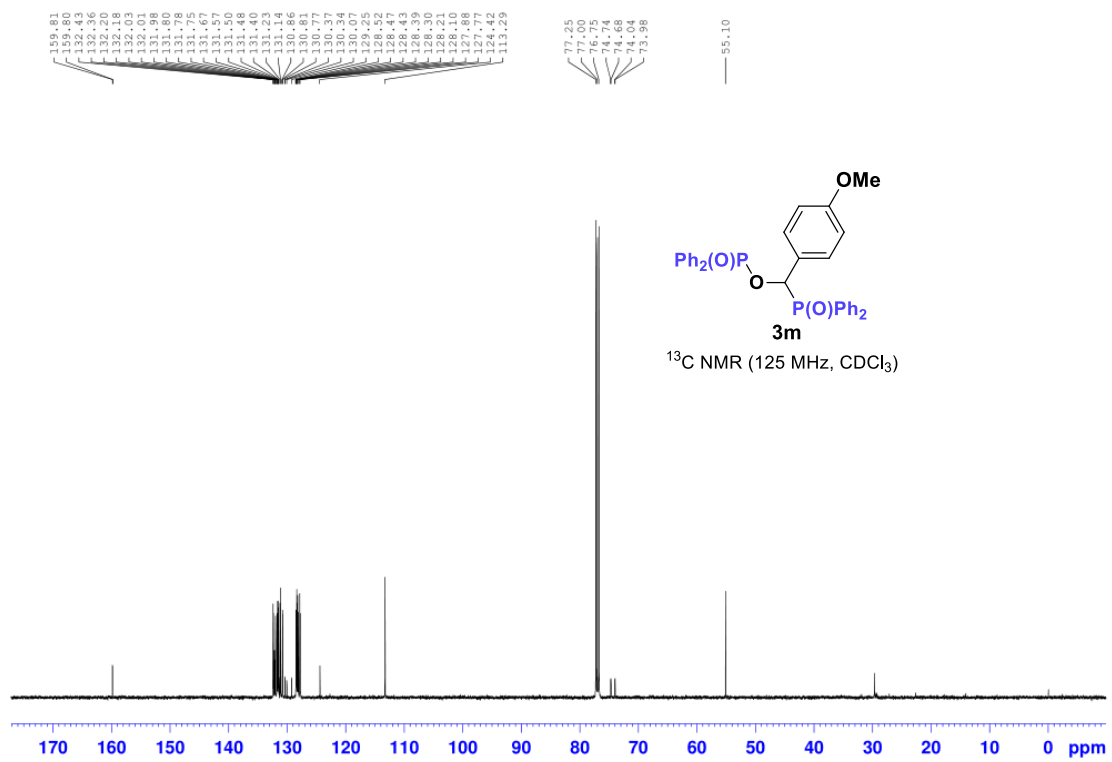

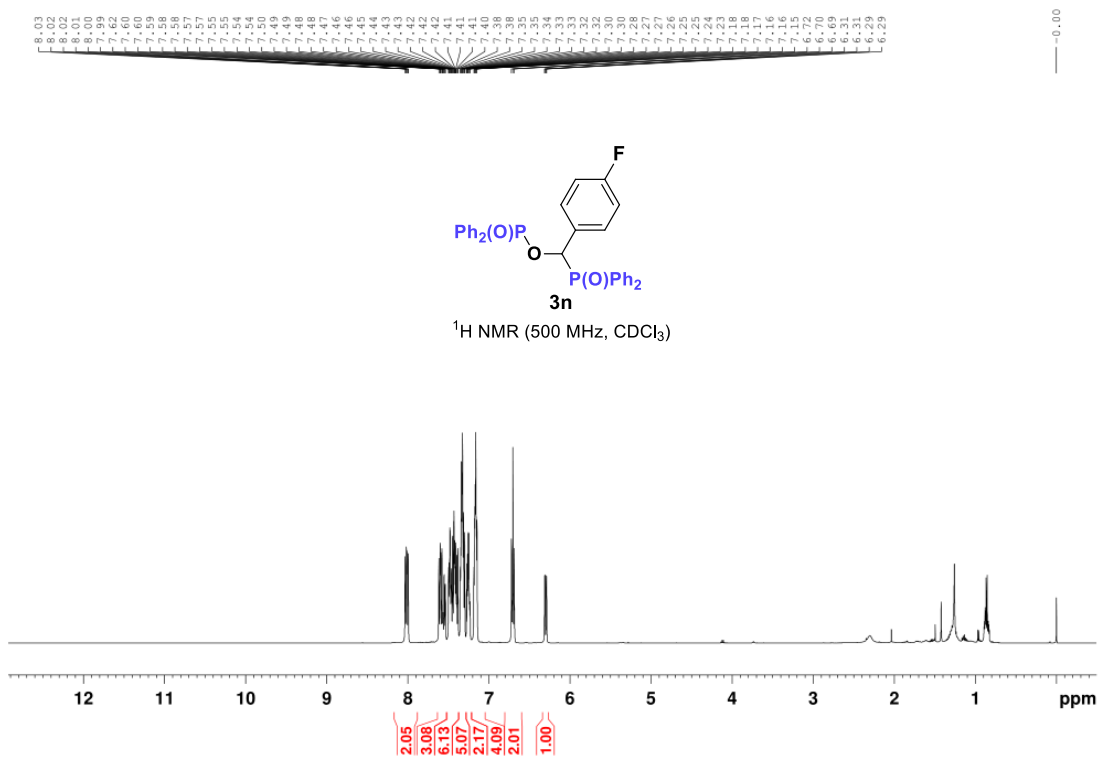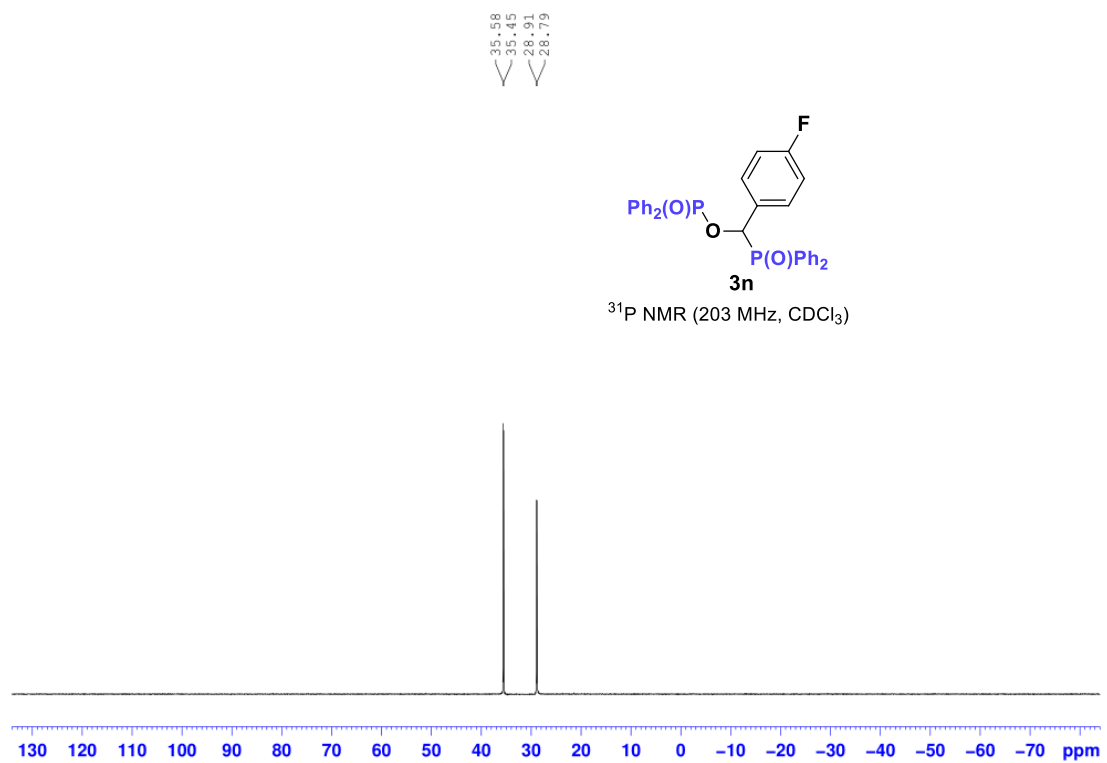

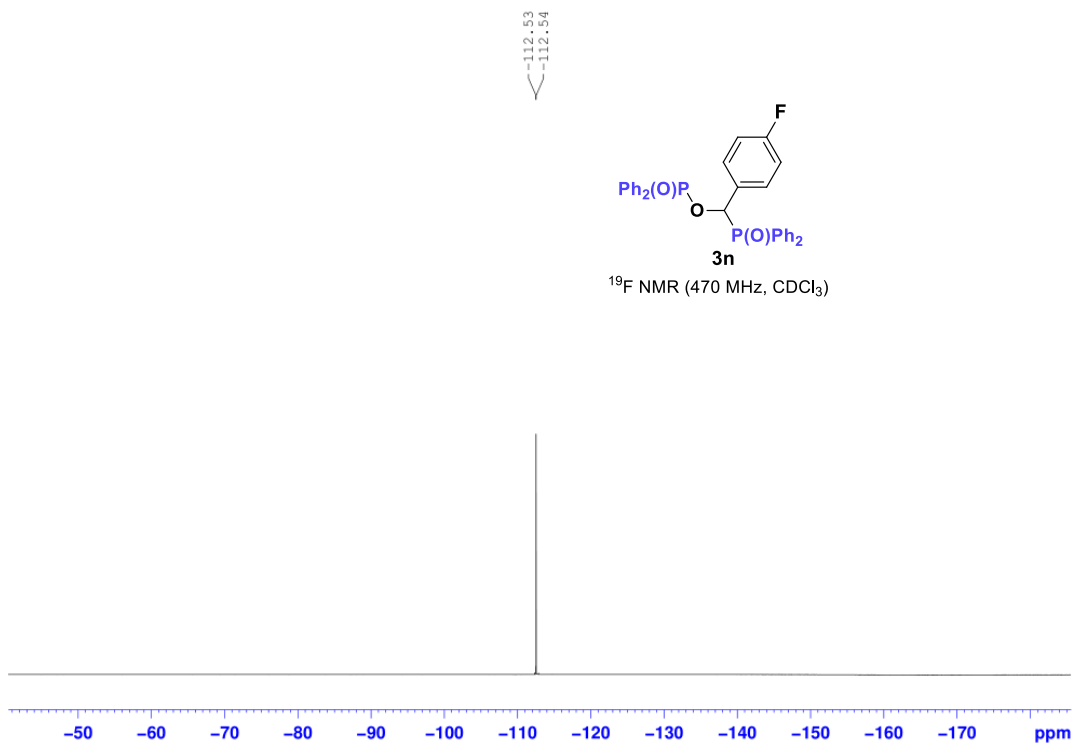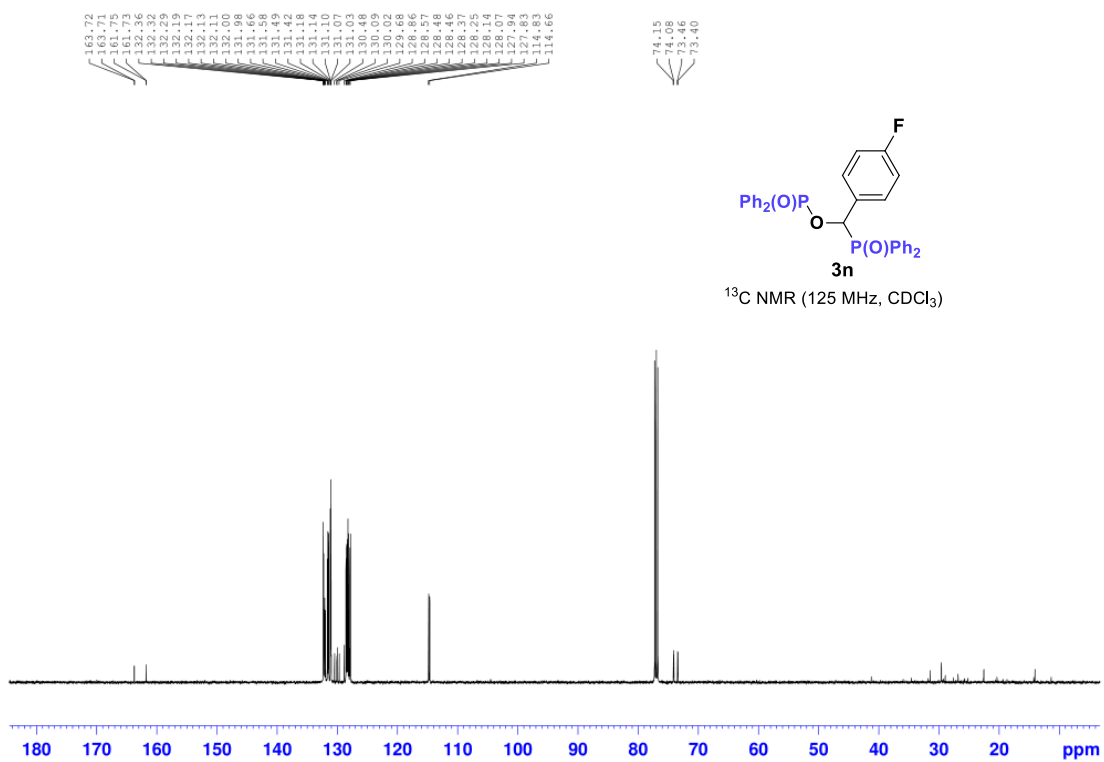

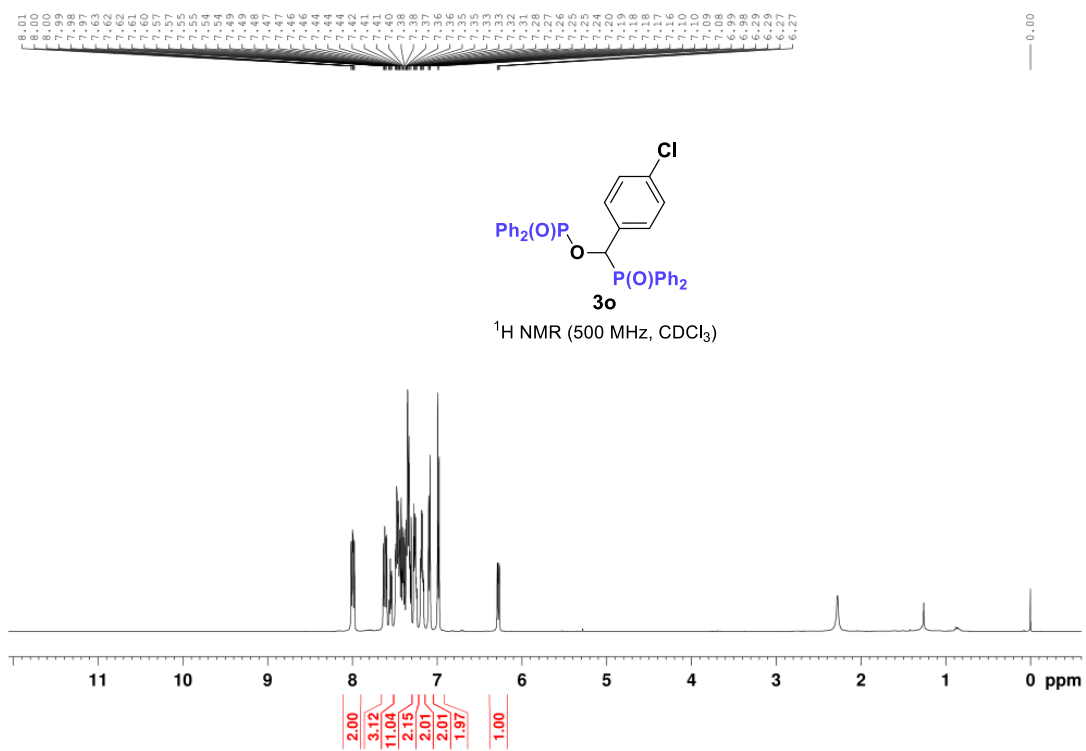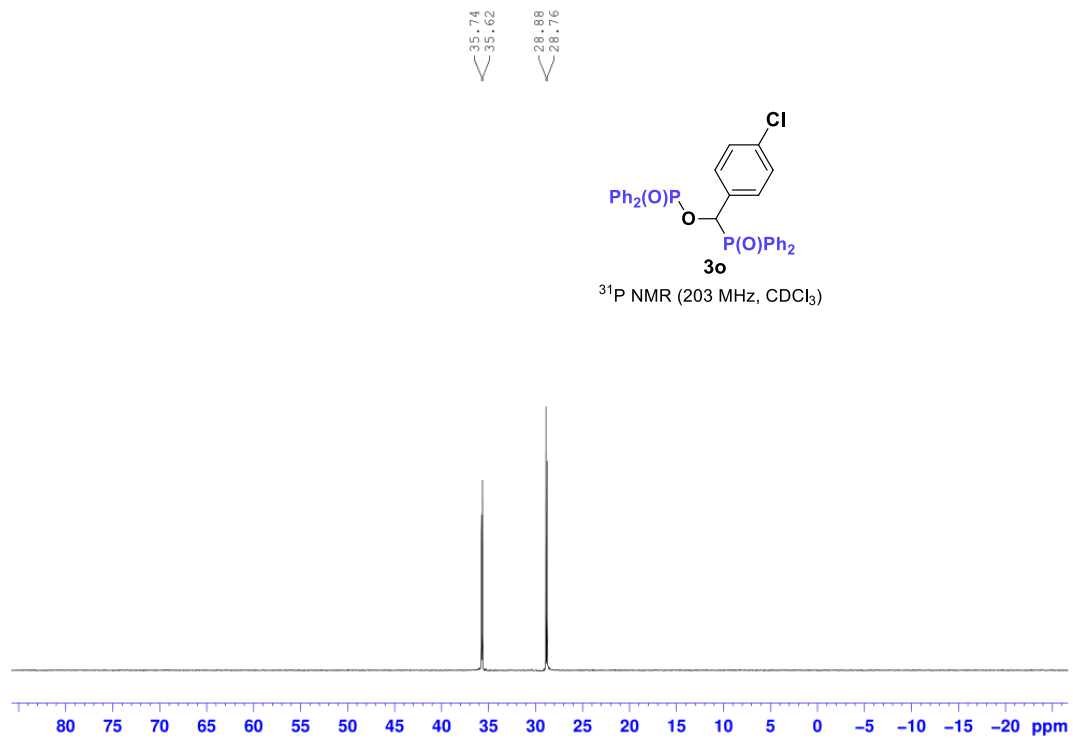

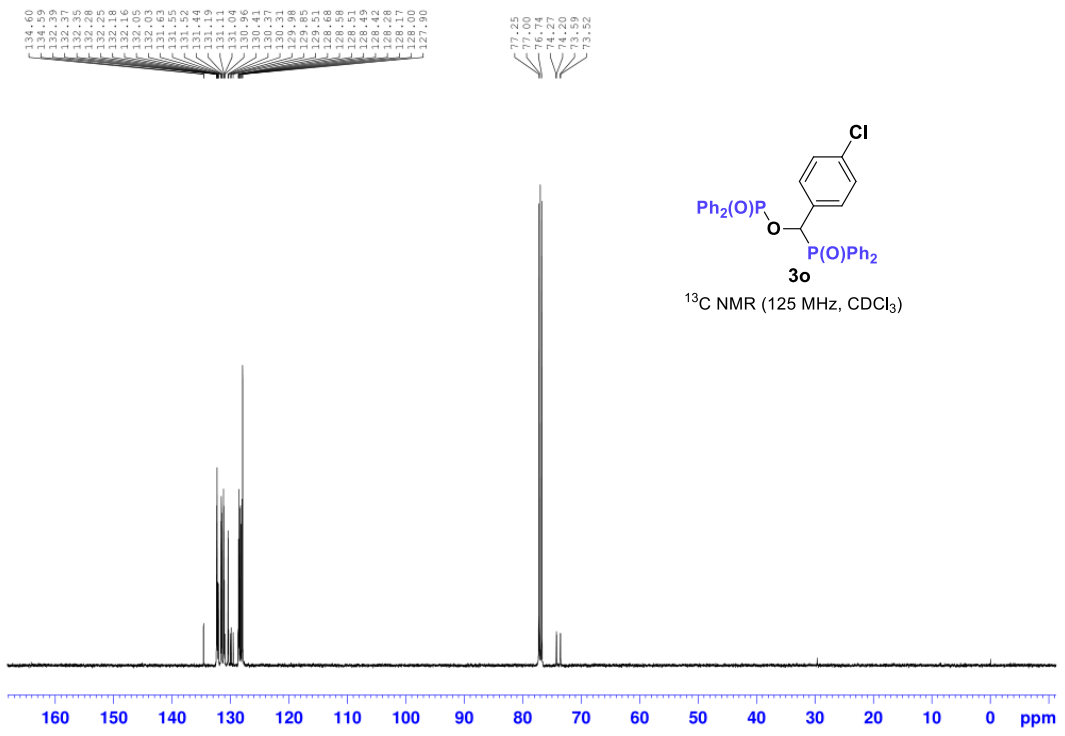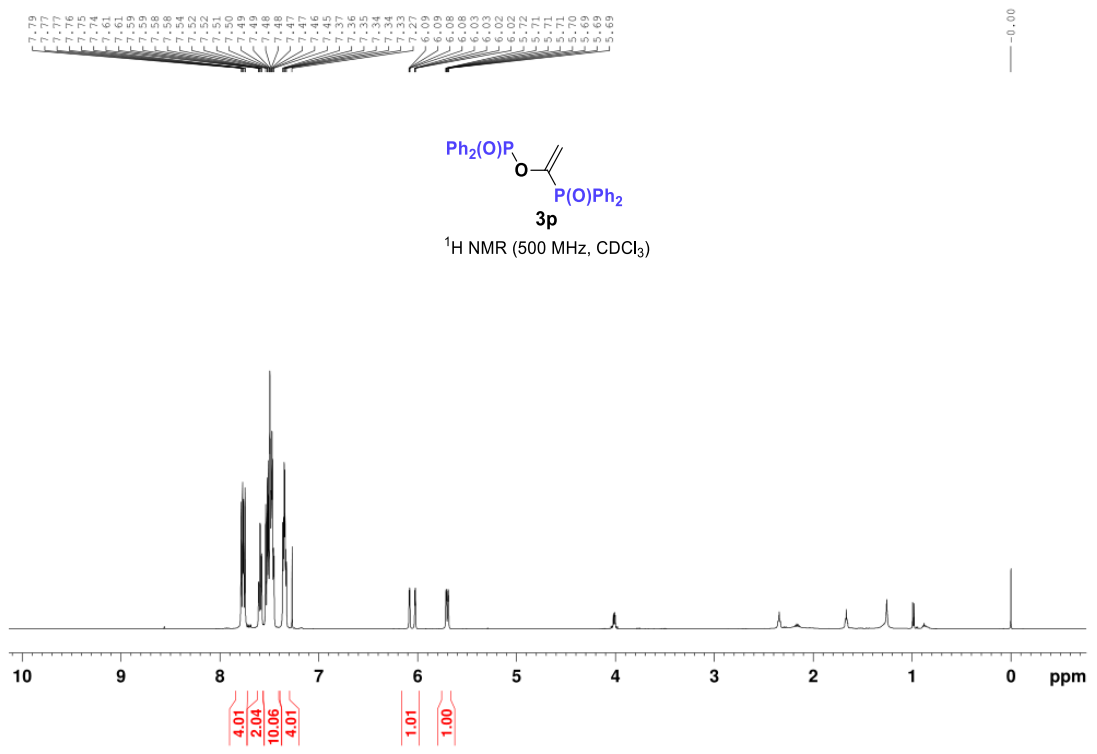

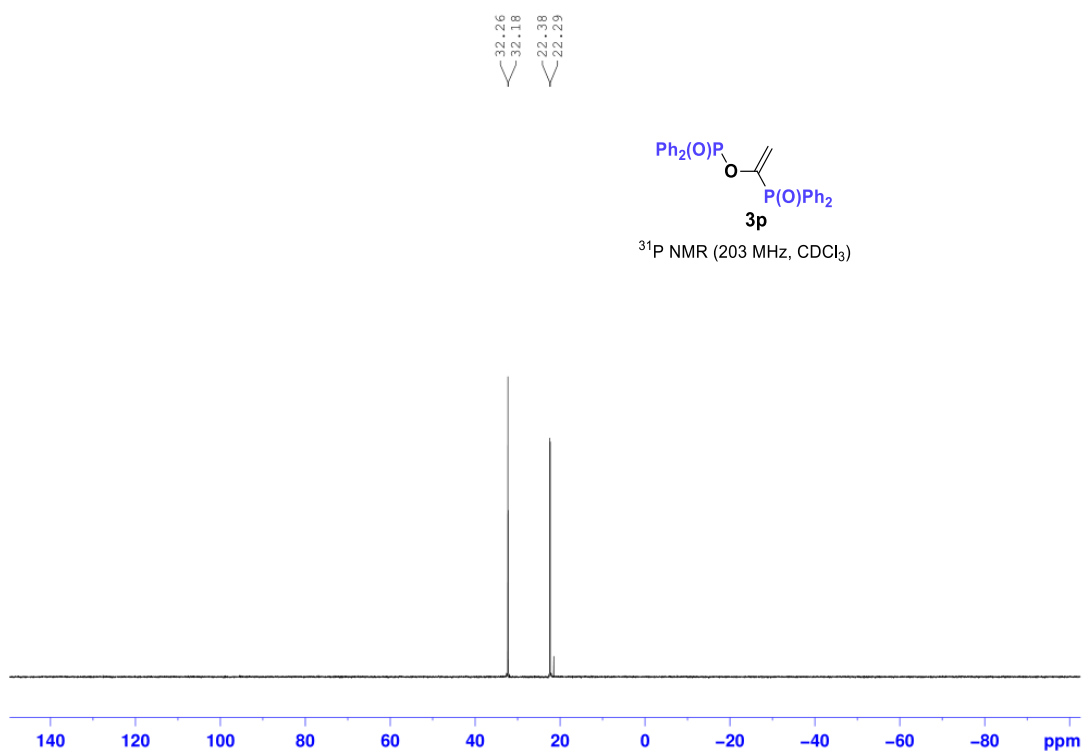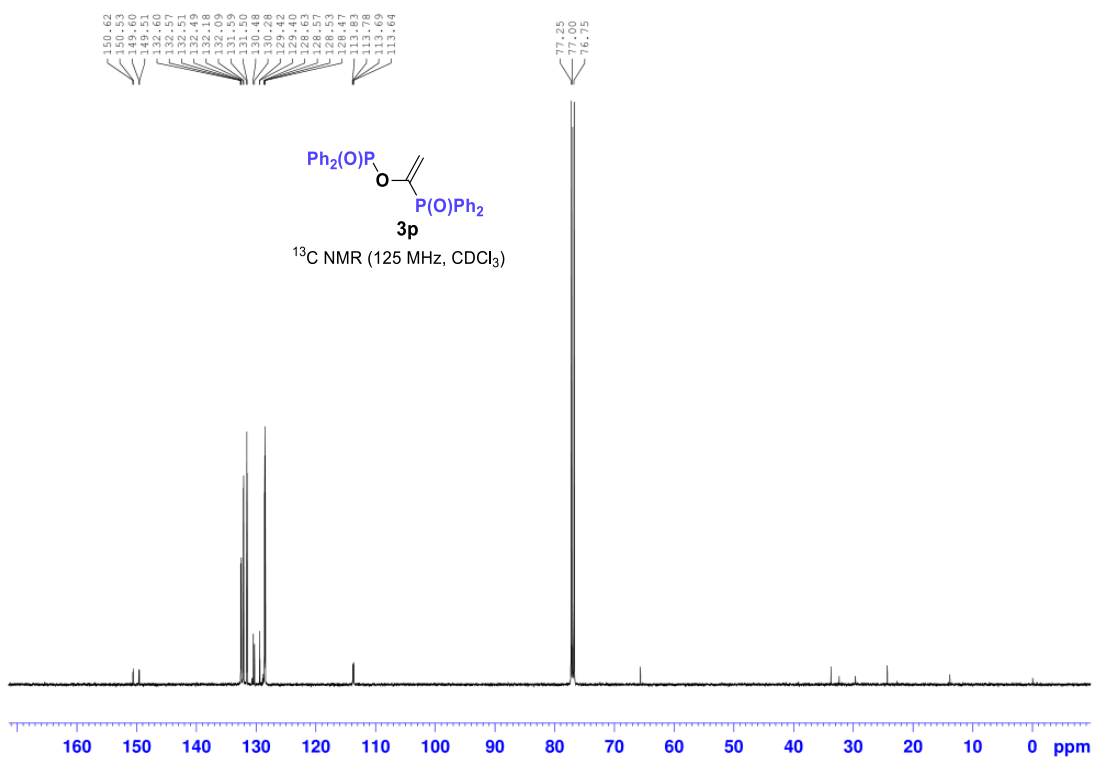



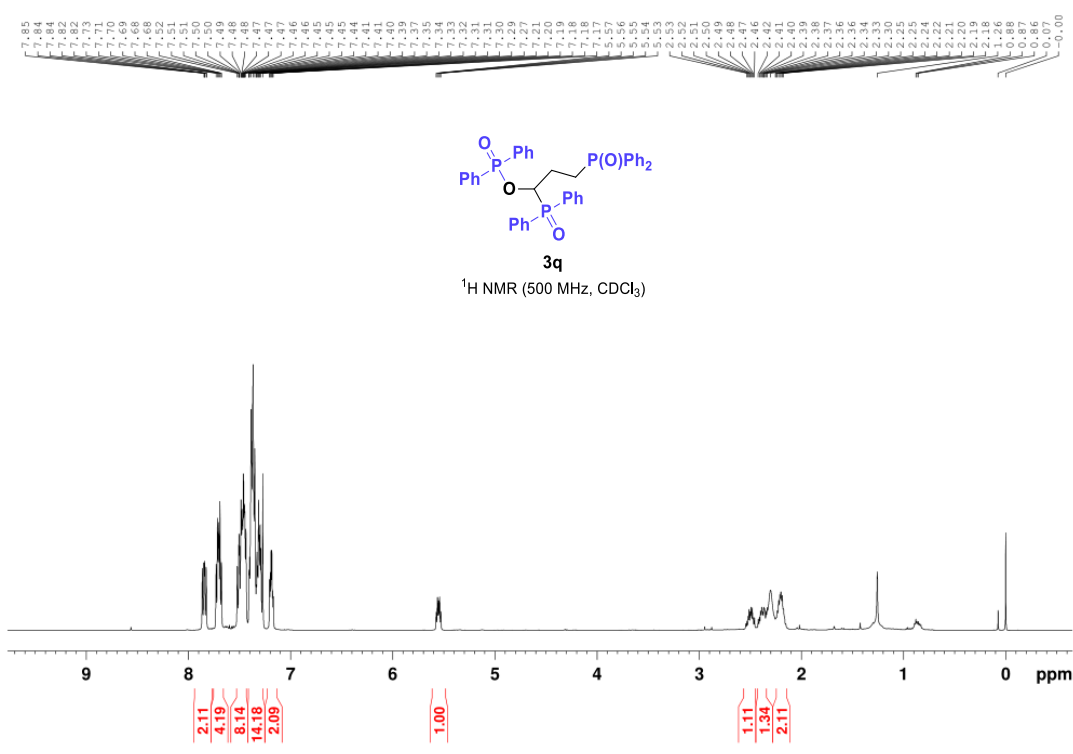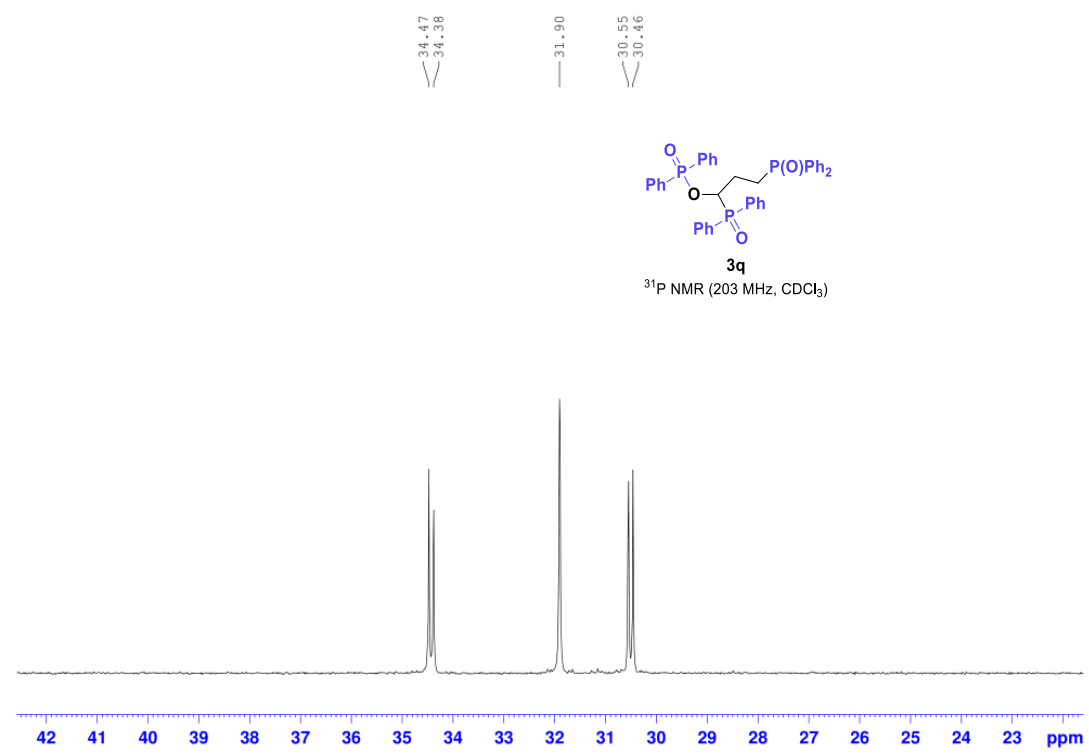

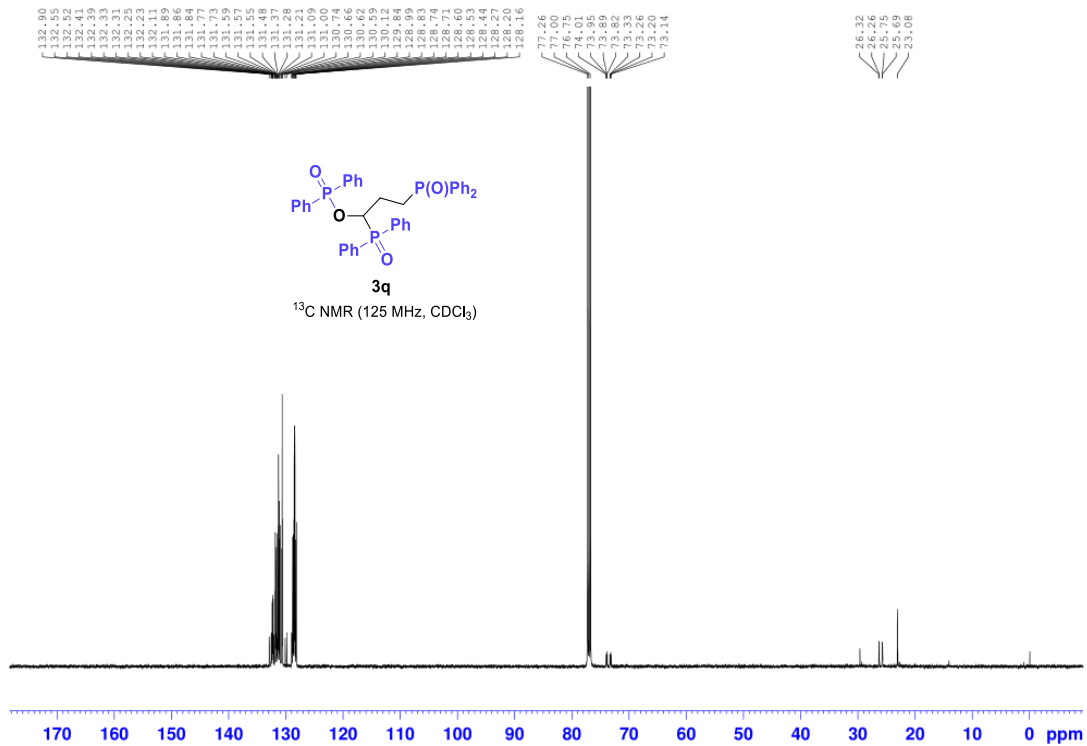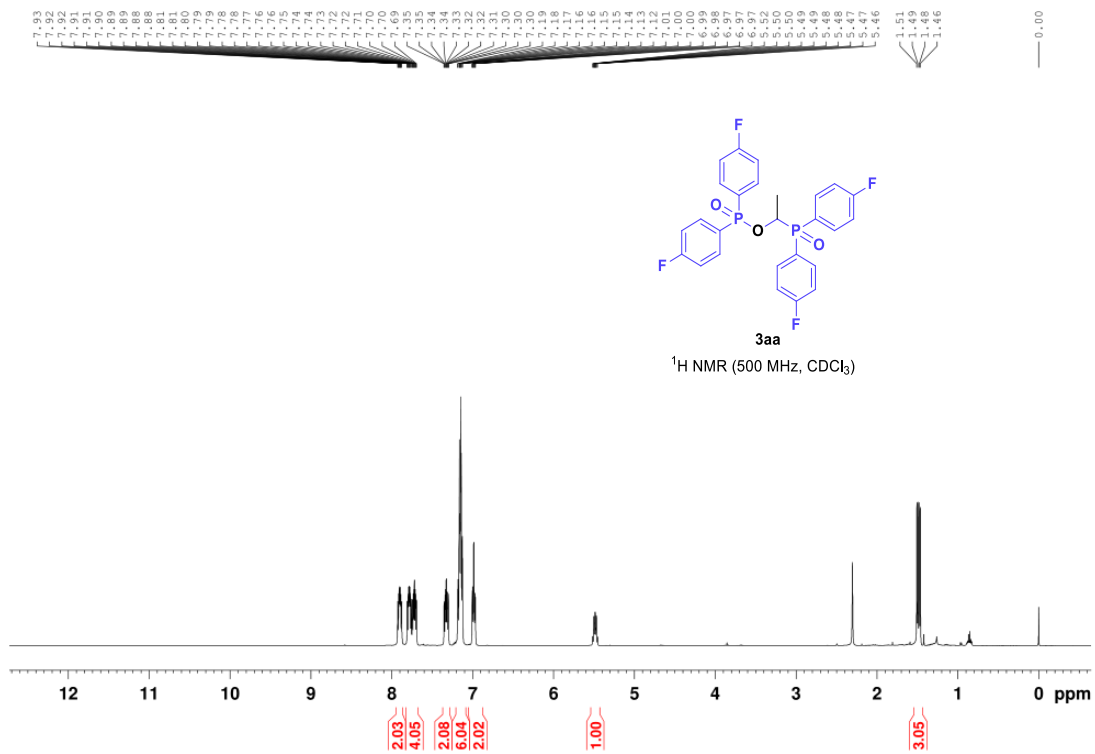

32.47  
32.36  
29.63

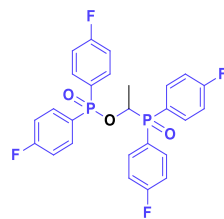

<sup>31</sup>P NMR (203 MHz, CDCl<sub>3</sub>)

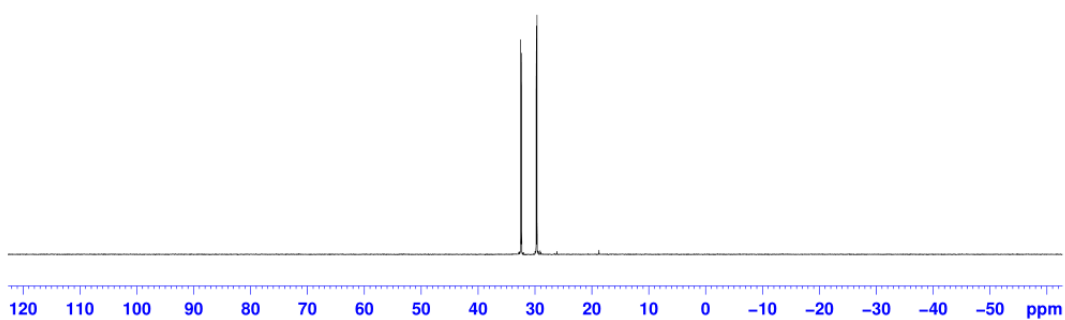

-104.87  
-105.13  
-105.15  
-105.41

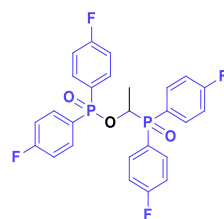

<sup>19</sup>F NMR (470 MHz, CDCl<sub>3</sub>)

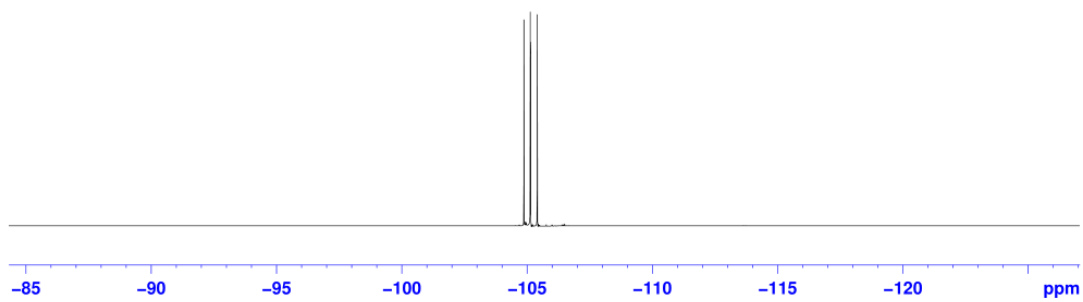

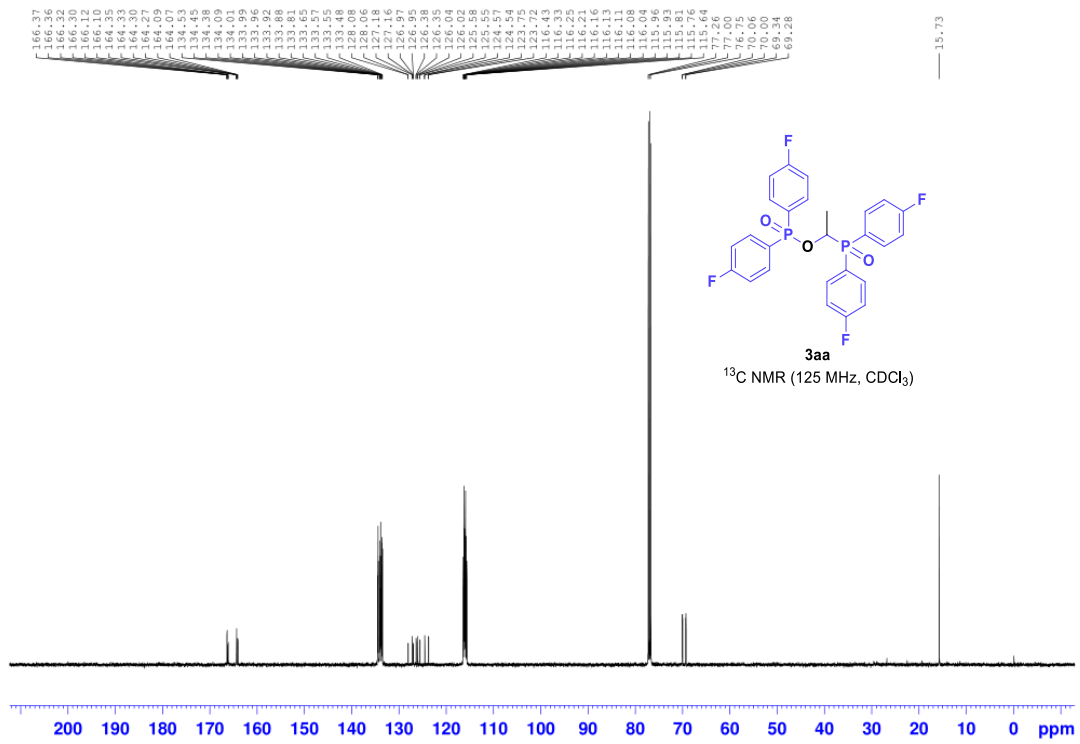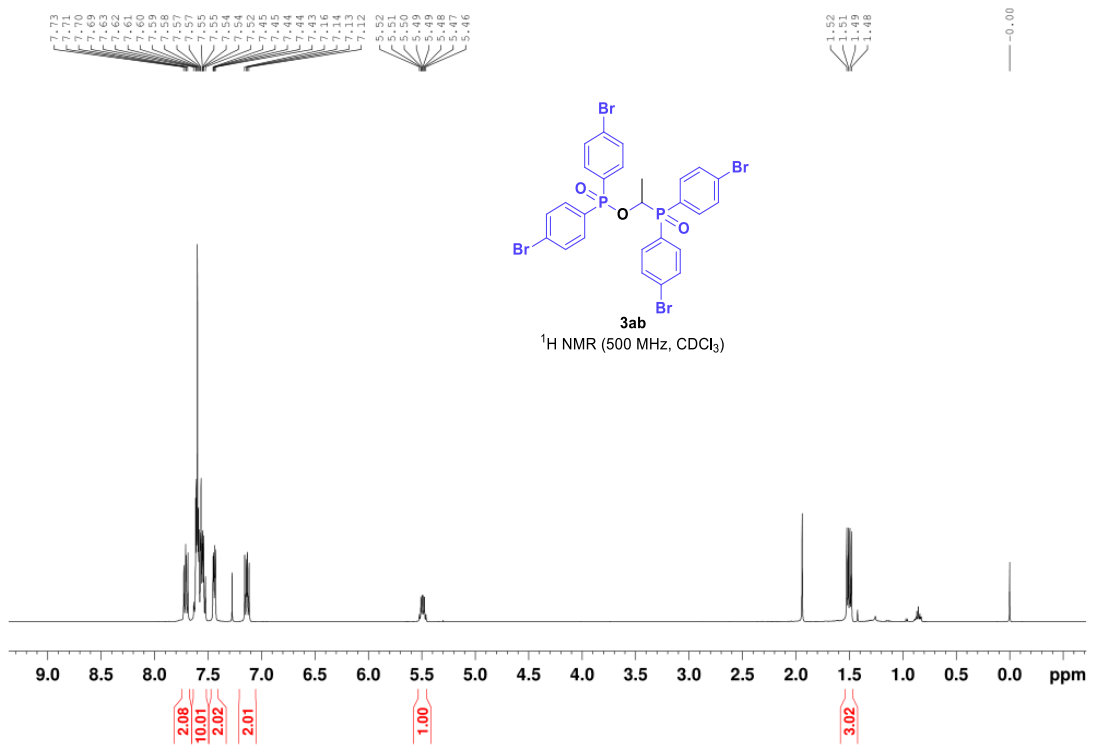

32.92  
32.81  
29.84  
29.73

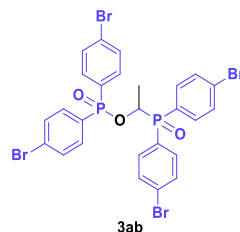

$^{31}\text{P}$  NMR (203 MHz,  $\text{CDCl}_3$ )

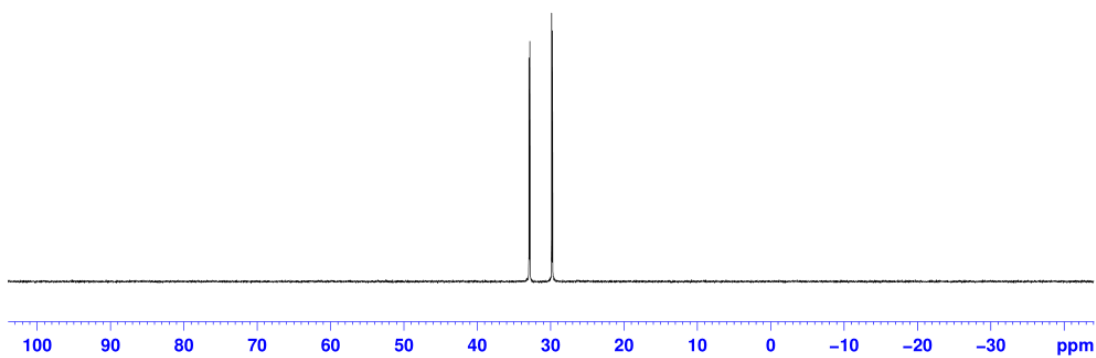

133.30  
132.73  
132.63  
132.73  
132.73  
132.65  
132.75  
132.75  
132.26  
132.19  
132.05  
131.95  
131.84  
131.83  
131.83  
129.82  
129.78  
129.73  
129.70  
128.34  
128.16  
128.13  
128.13  
128.06  
128.03  
127.88  
127.47  
126.67

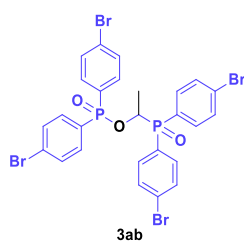

$^{13}\text{C}$  NMR (125 MHz,  $\text{CDCl}_3$ )

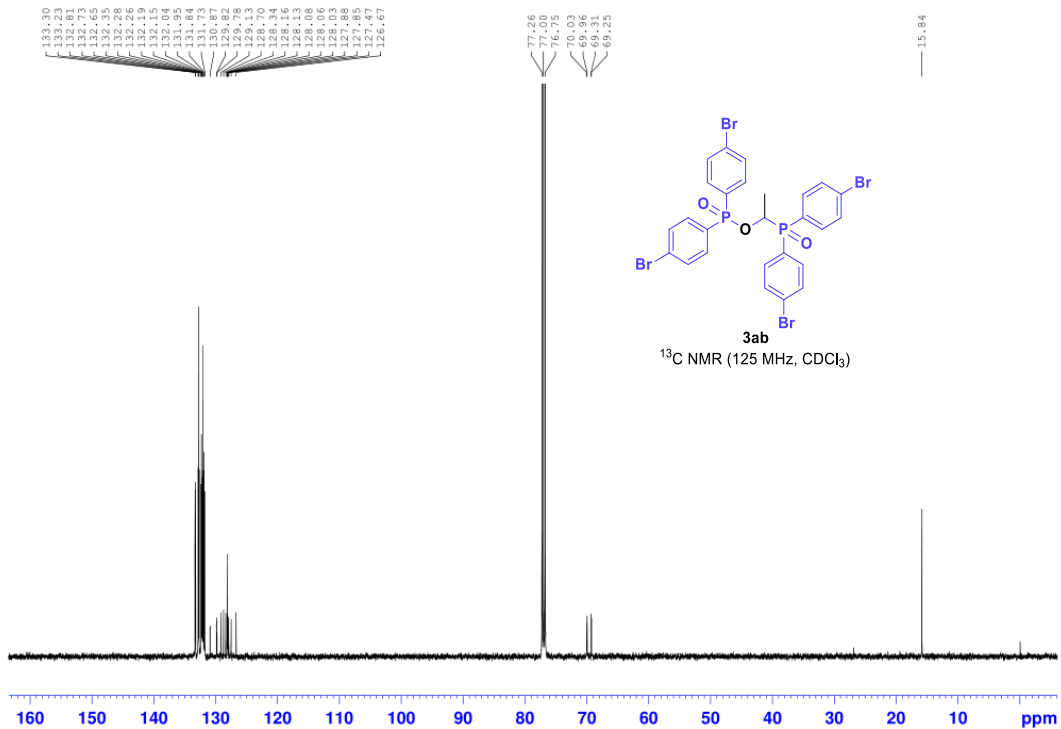

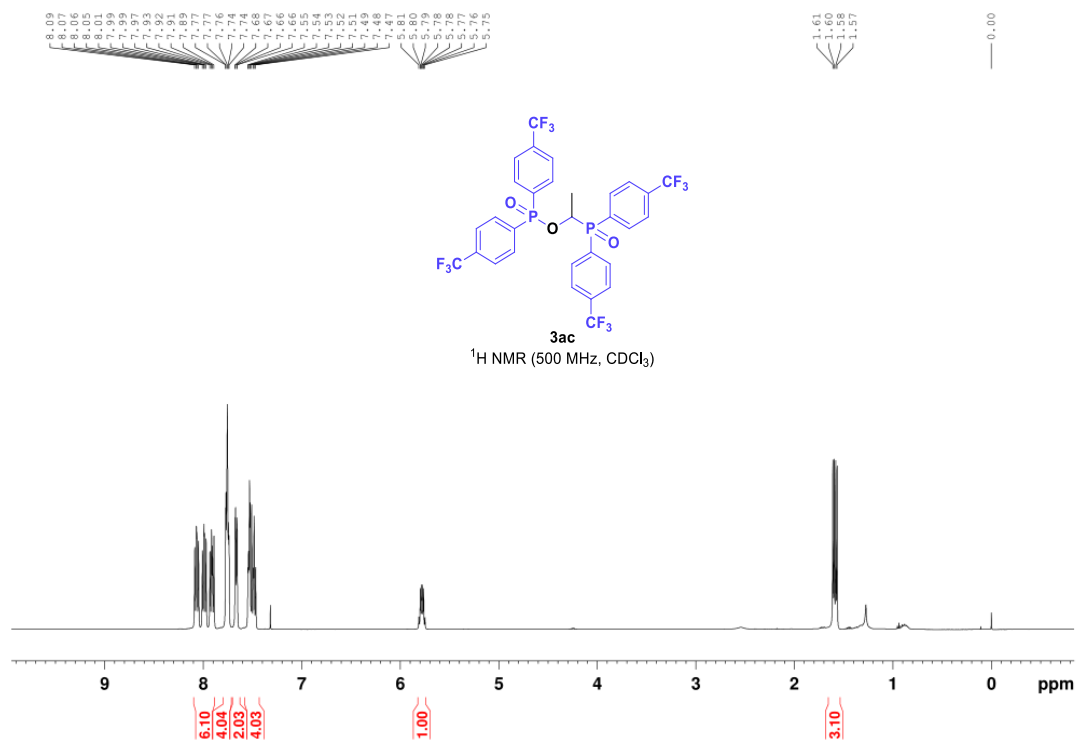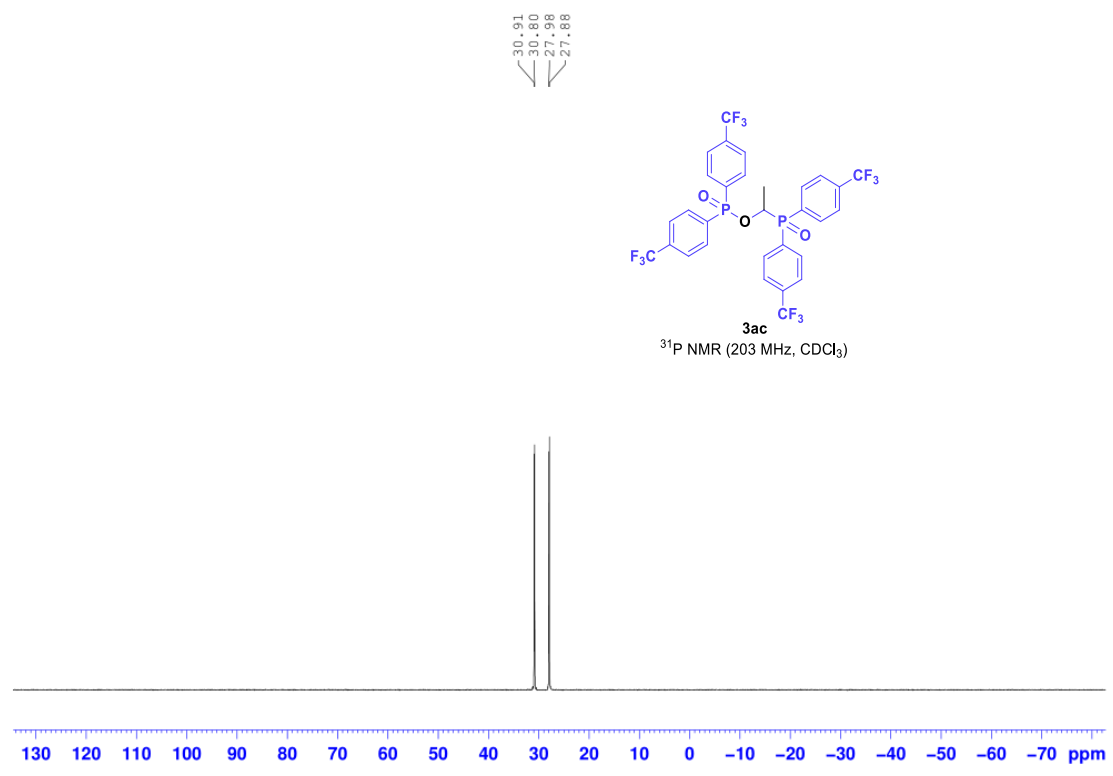

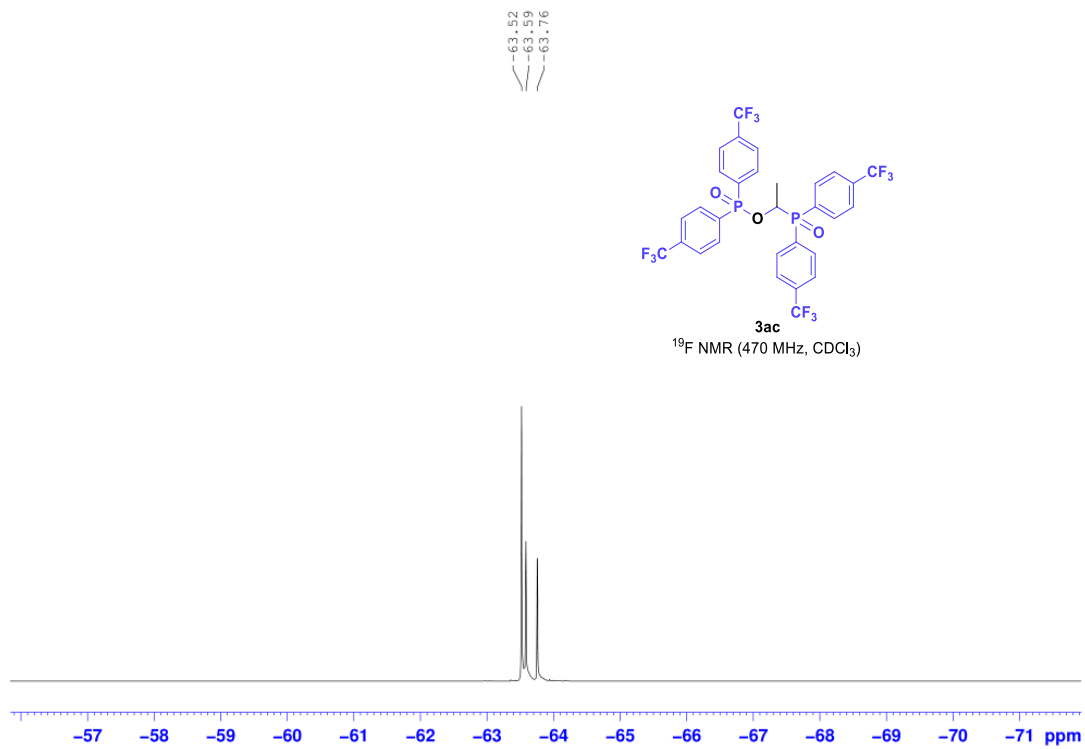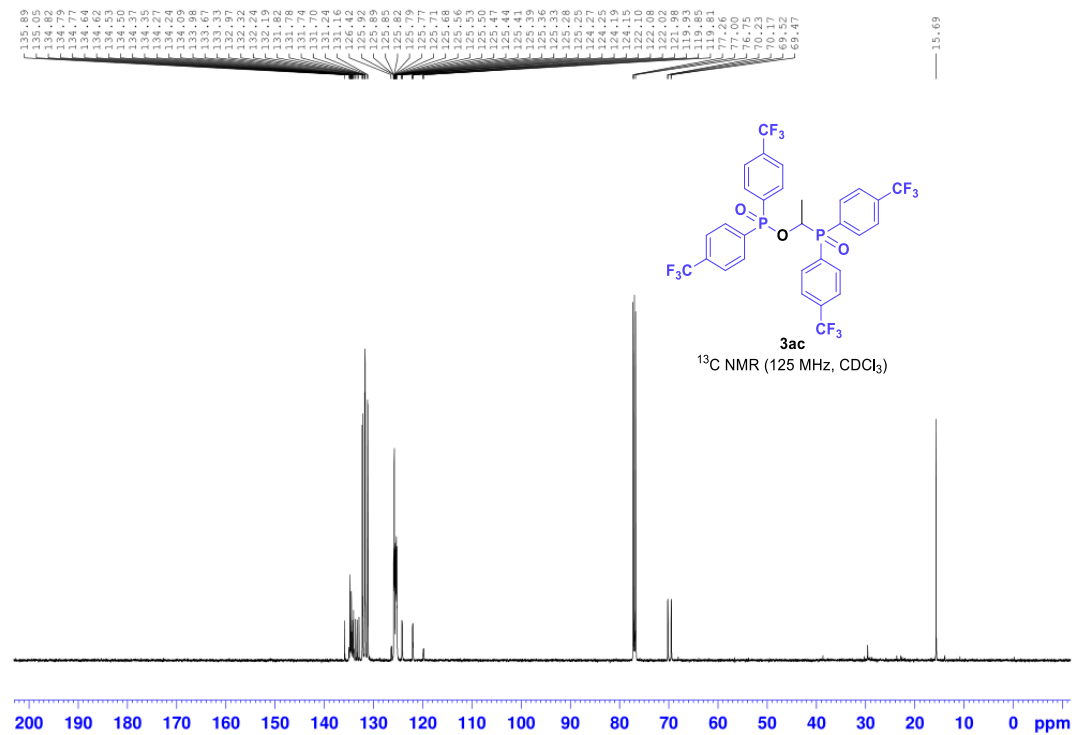

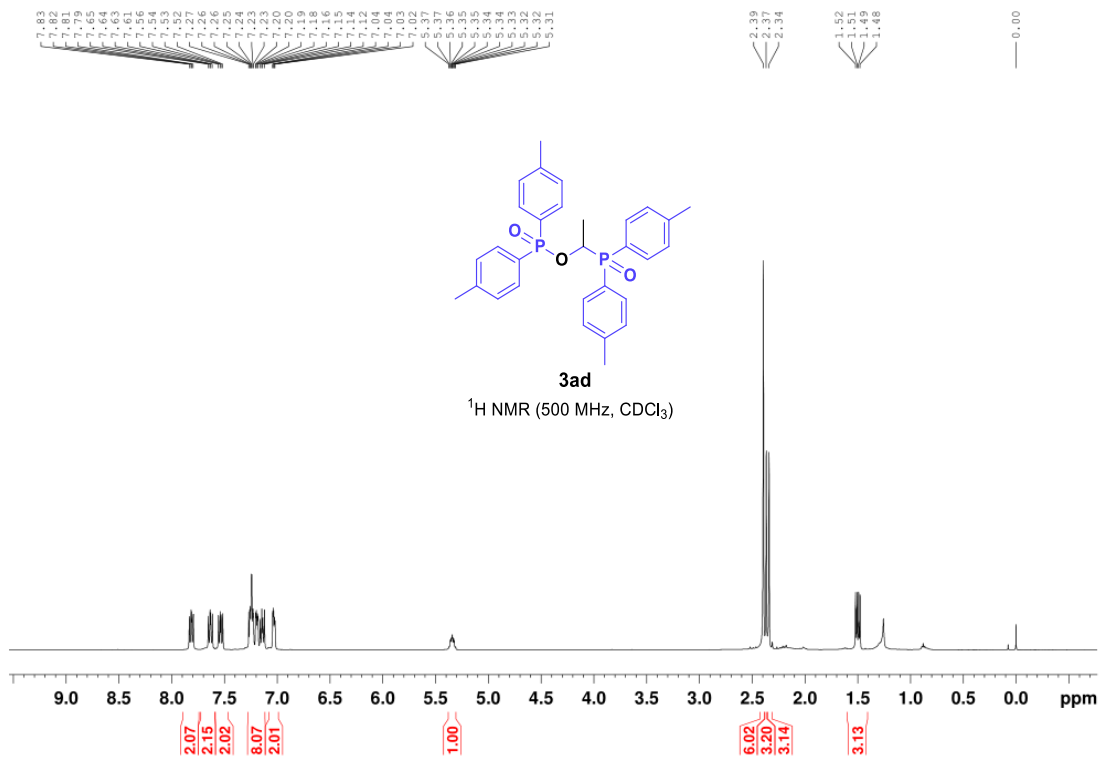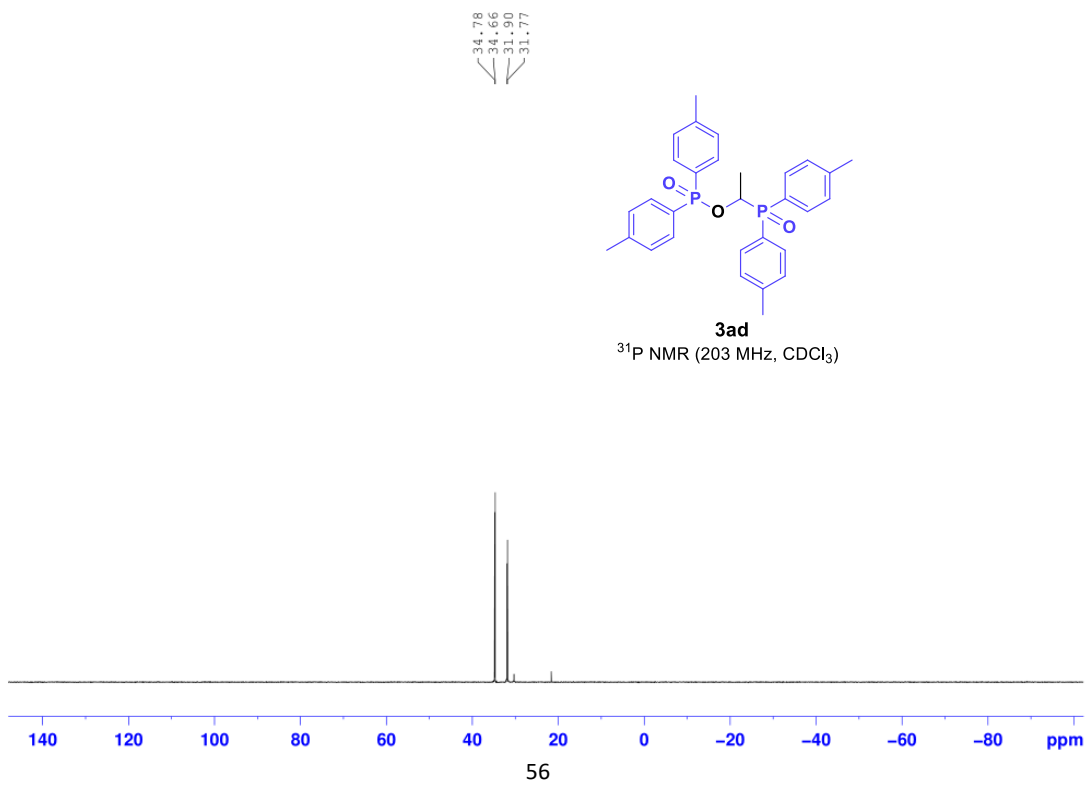



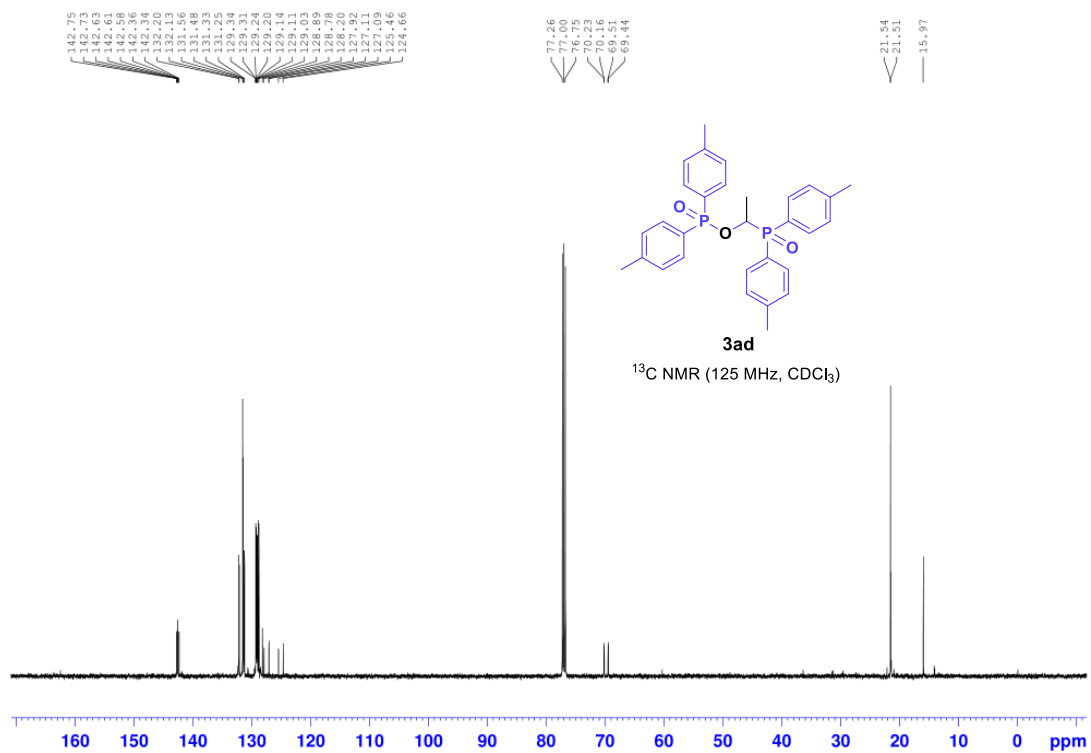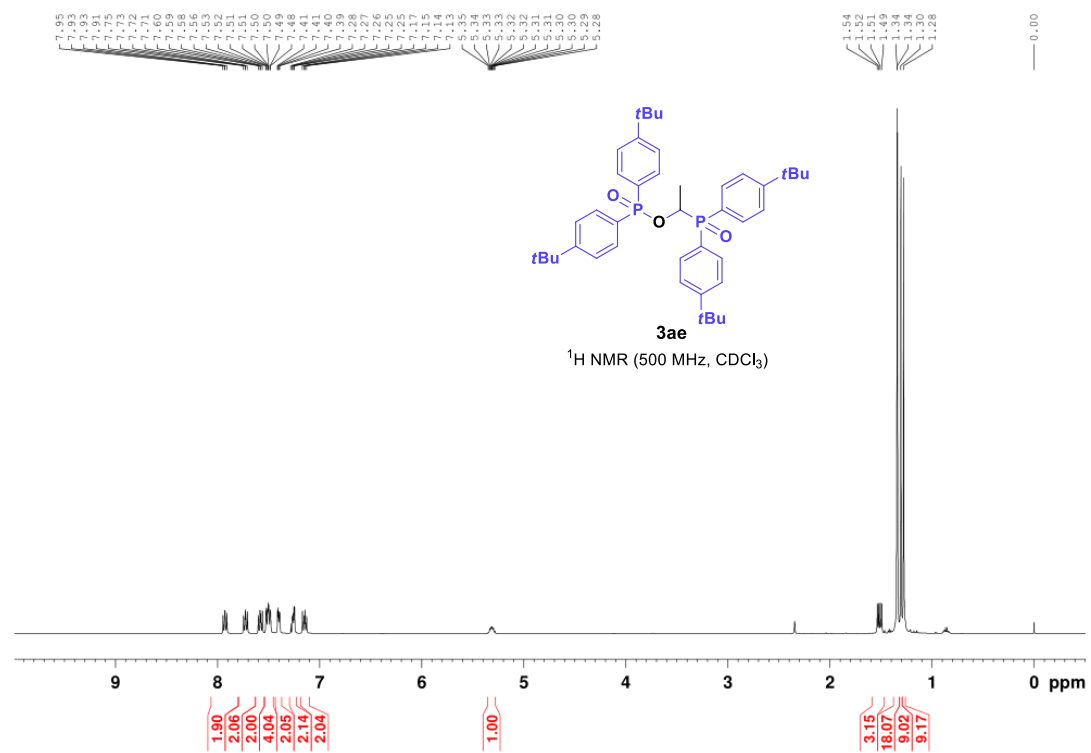

34.33  
34.20  
31.41  
31.47

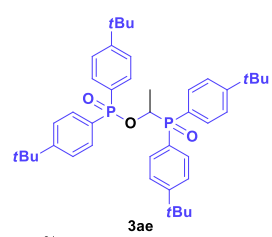

<sup>31</sup>P NMR (203 MHz, CDCl<sub>3</sub>)

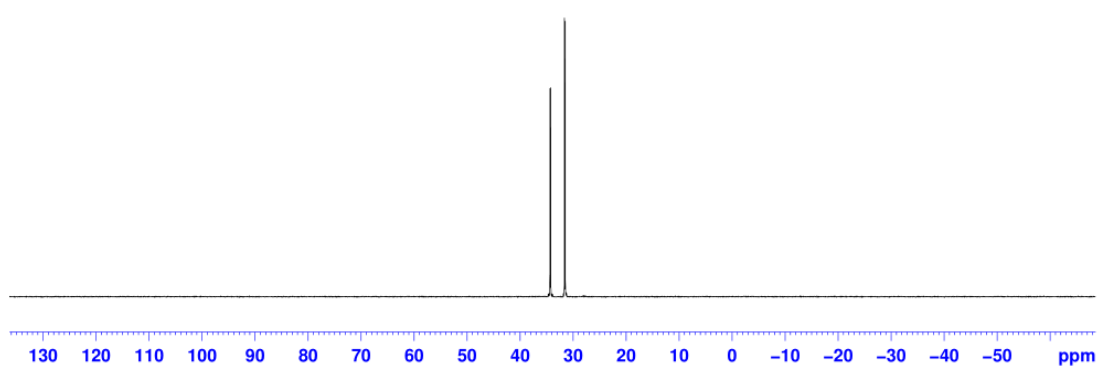

155.67  
155.65  
155.64  
155.58  
155.56  
155.56  
155.37  
155.37  
139.78  
139.78  
132.11  
131.61  
131.54  
131.54  
131.90  
131.90  
131.21  
129.18  
129.11  
129.11  
127.01  
125.61  
125.51  
125.49  
125.40  
125.34  
125.23  
125.11  
124.73

77.26  
77.00  
76.50  
70.44  
69.78  
69.72

34.96  
34.86  
31.08  
31.06  
30.98

15.94

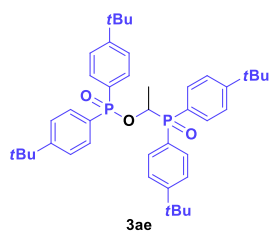

<sup>13</sup>C NMR (125 MHz, CDCl<sub>3</sub>)

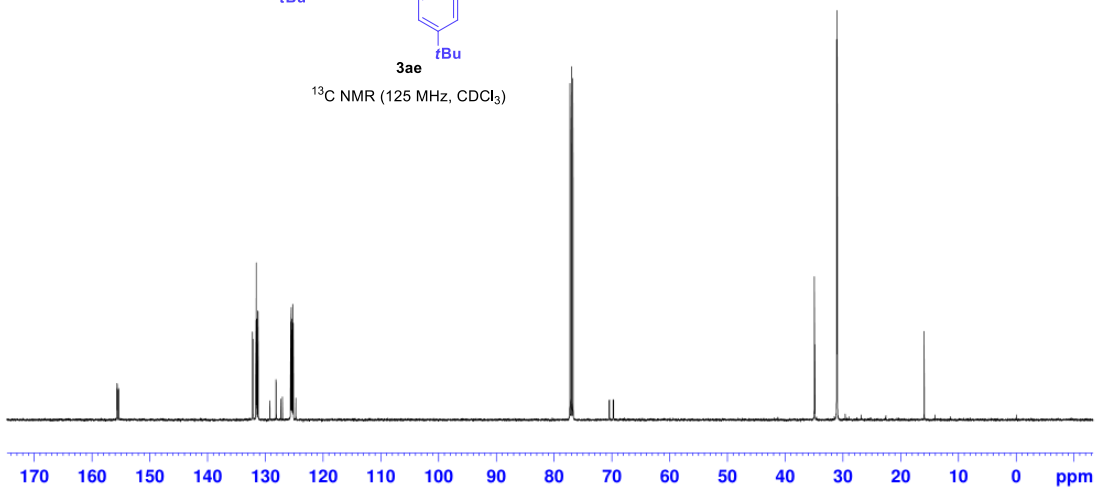

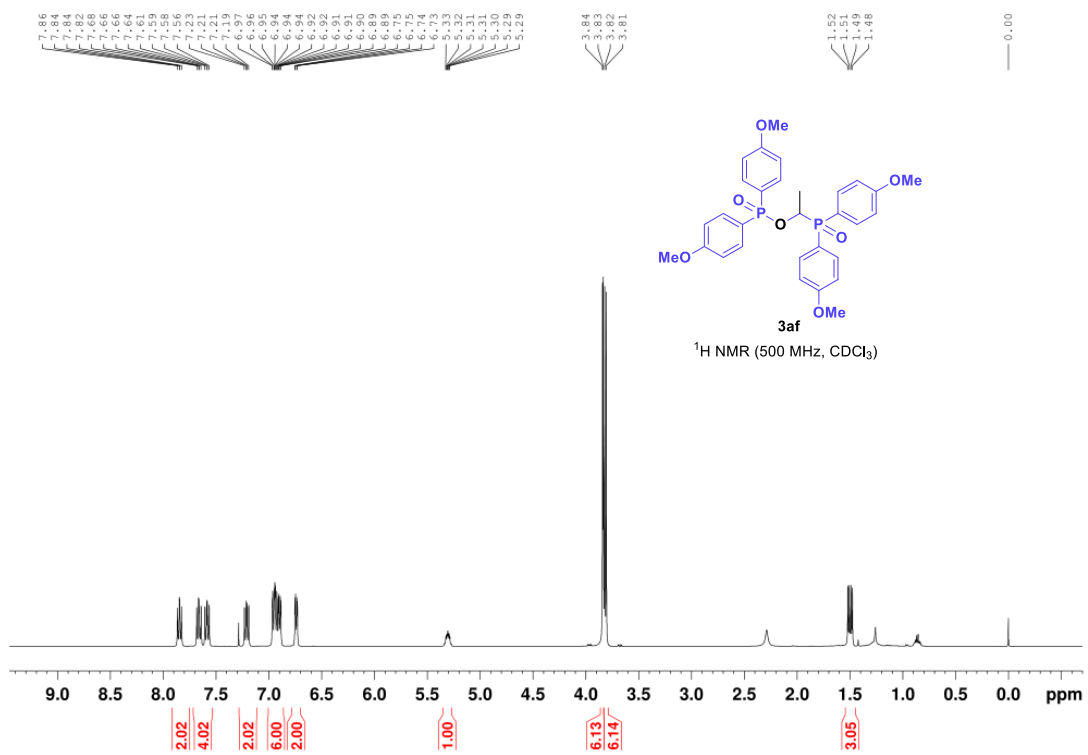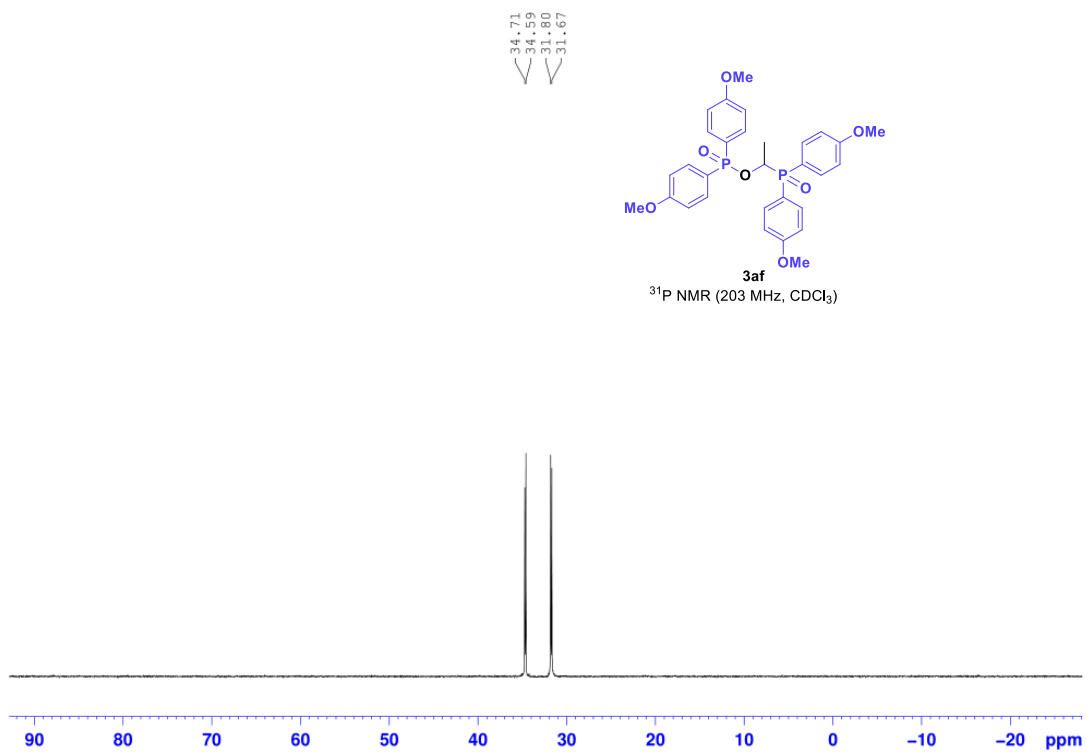

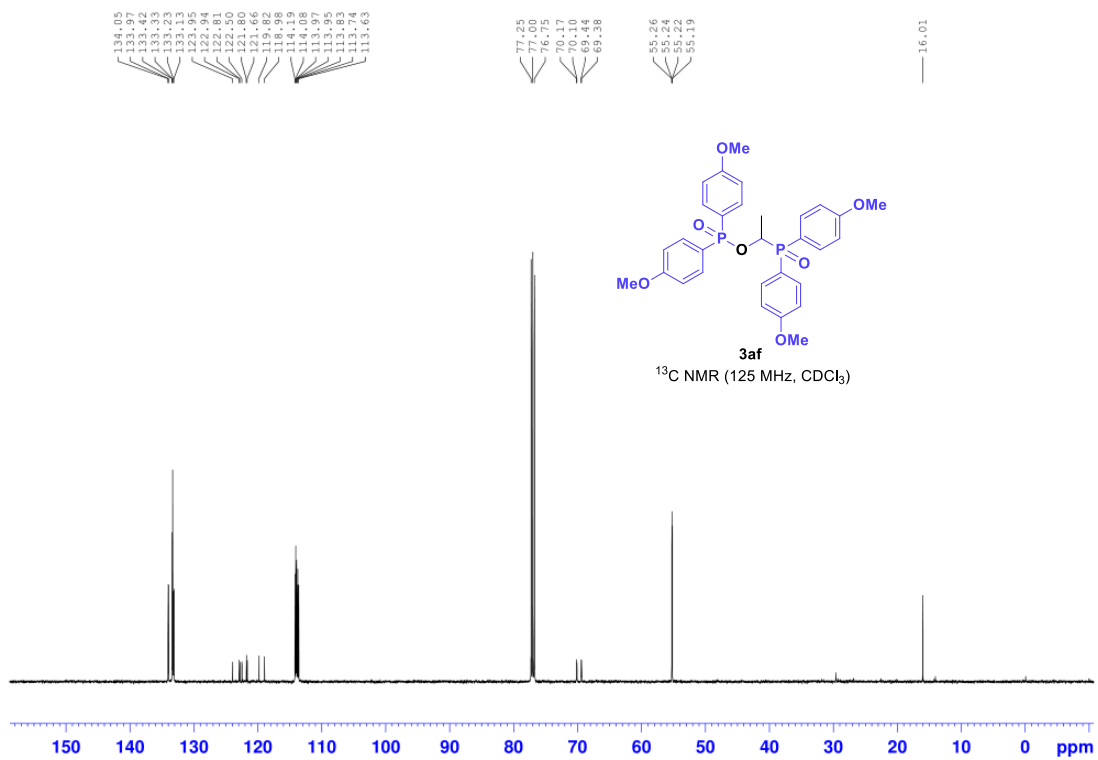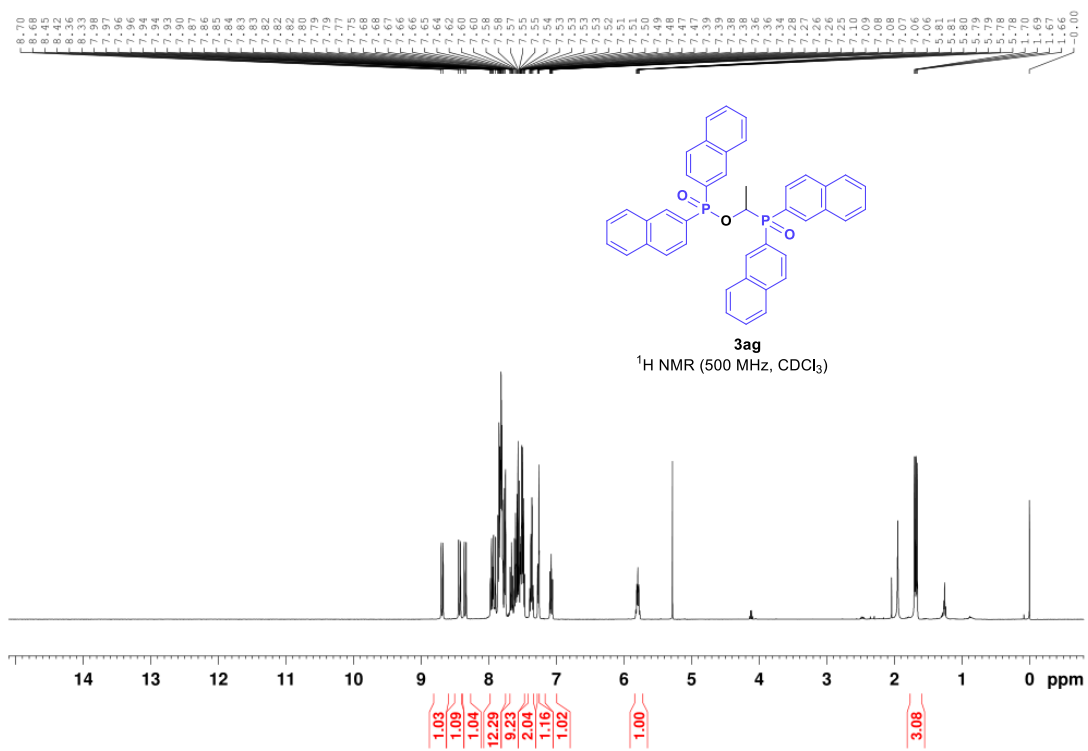

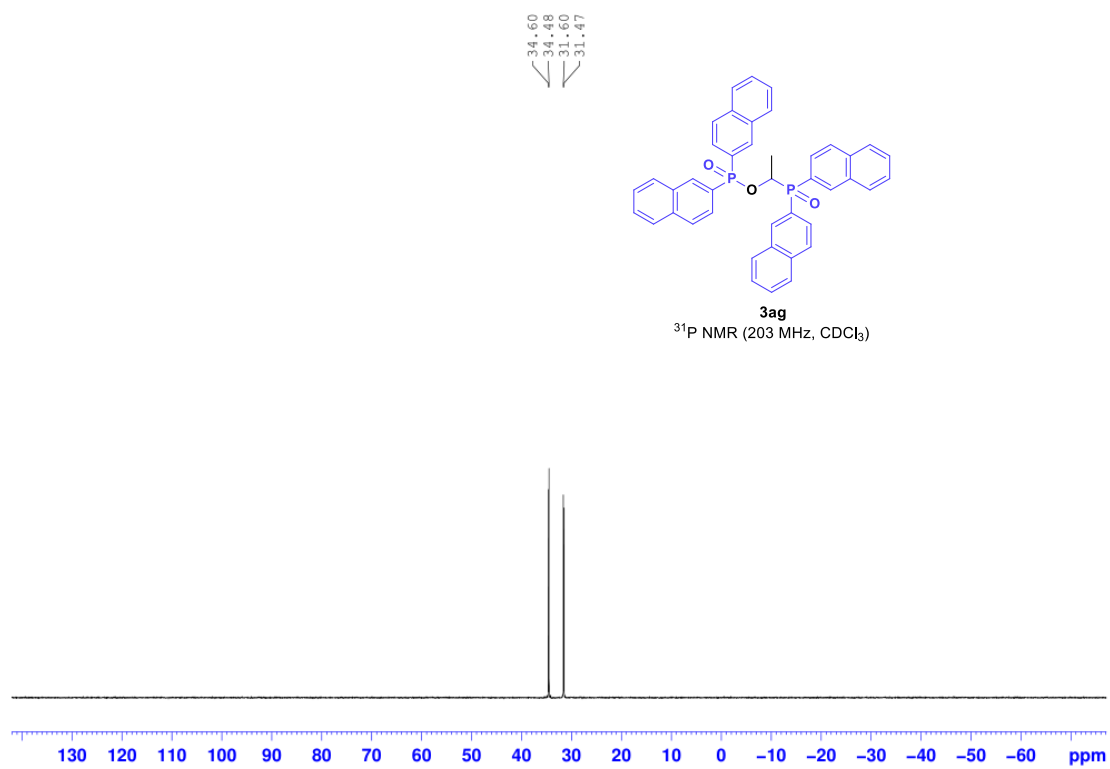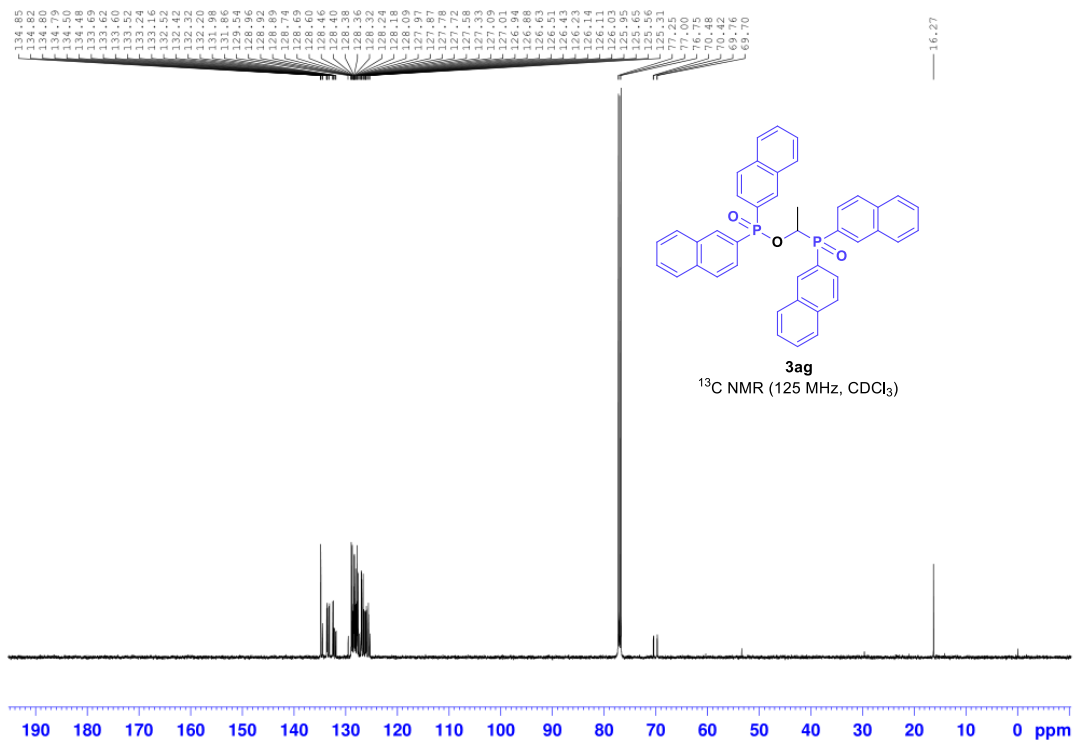

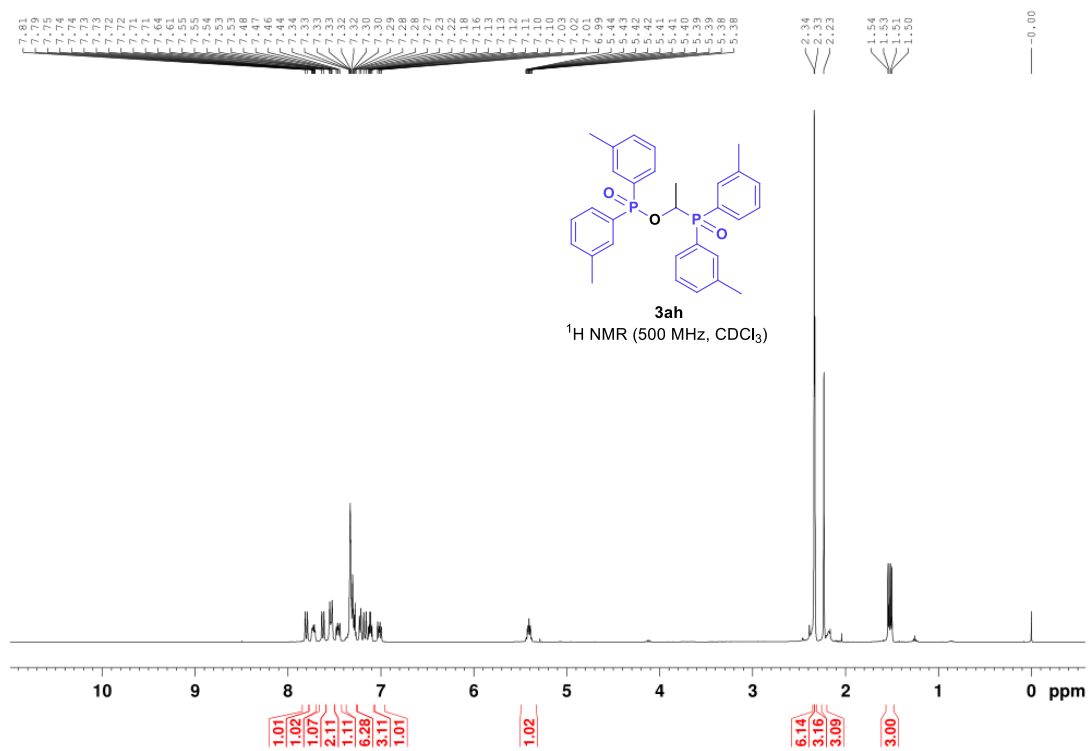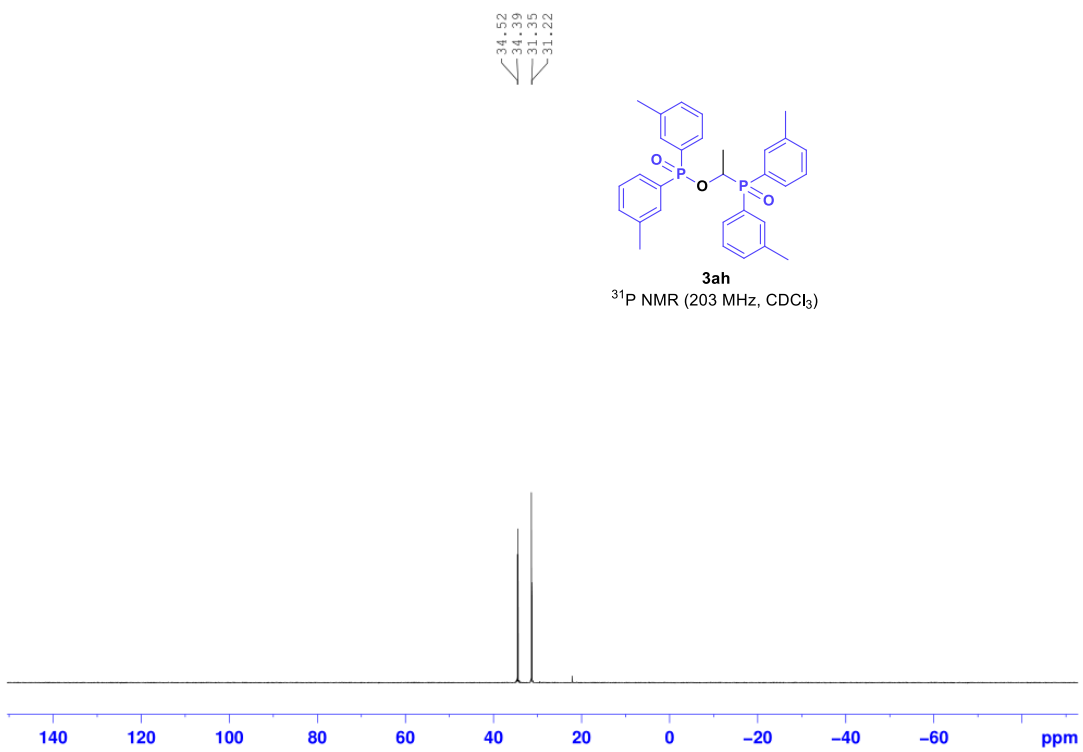

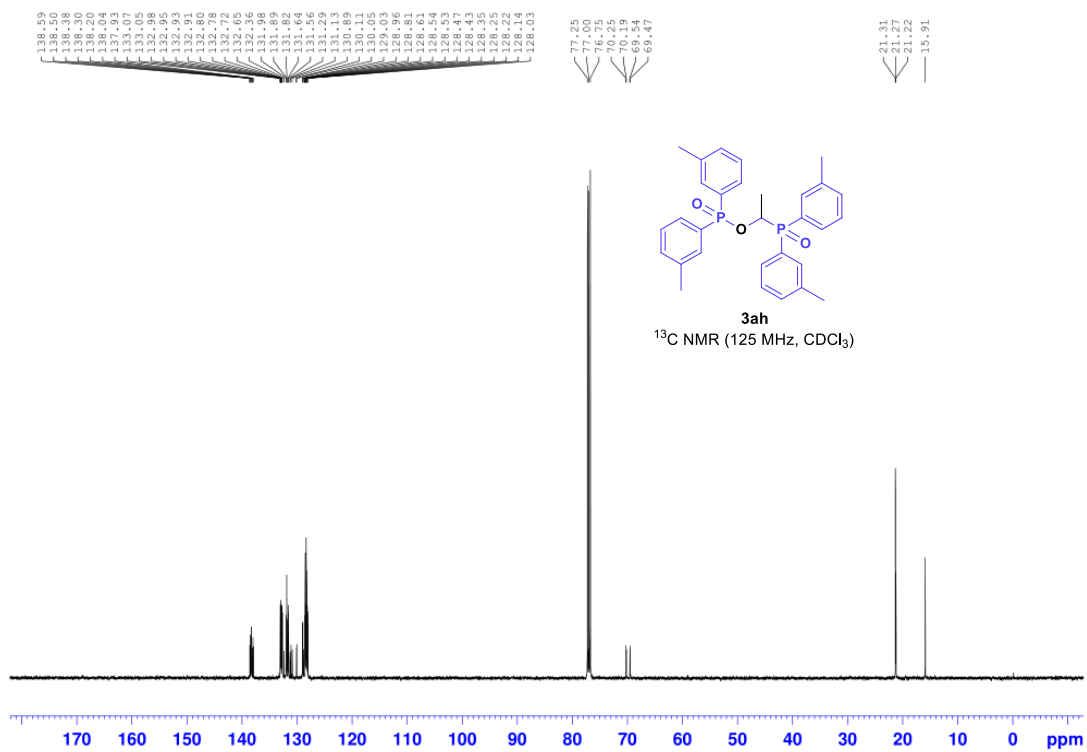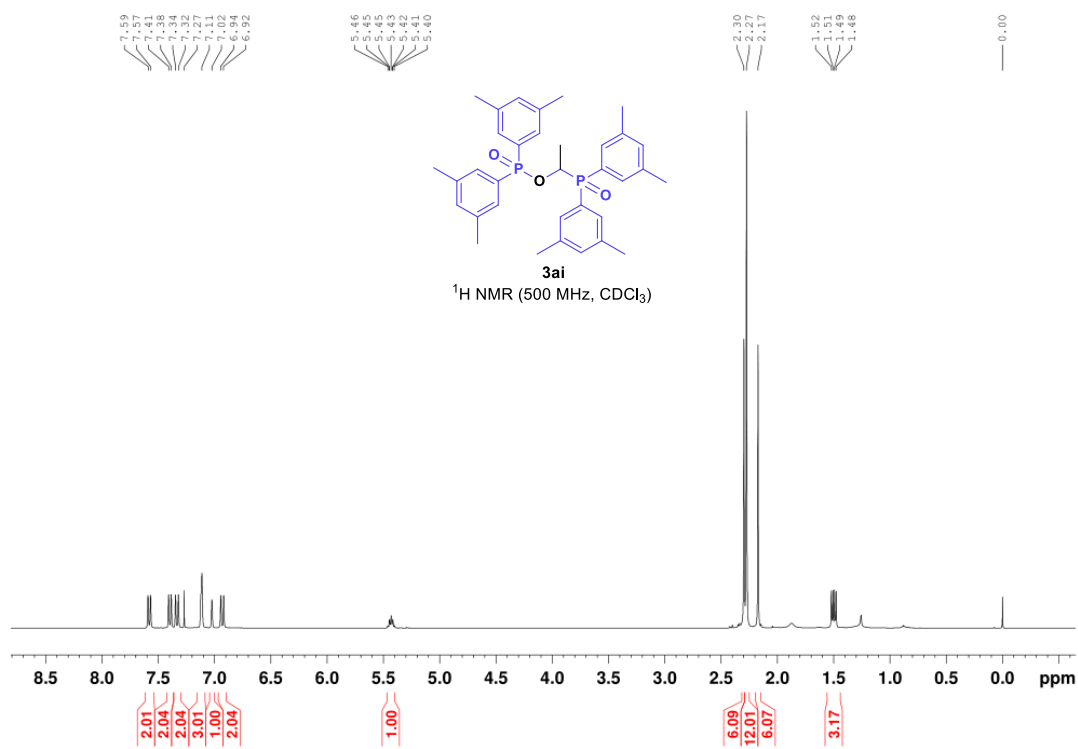

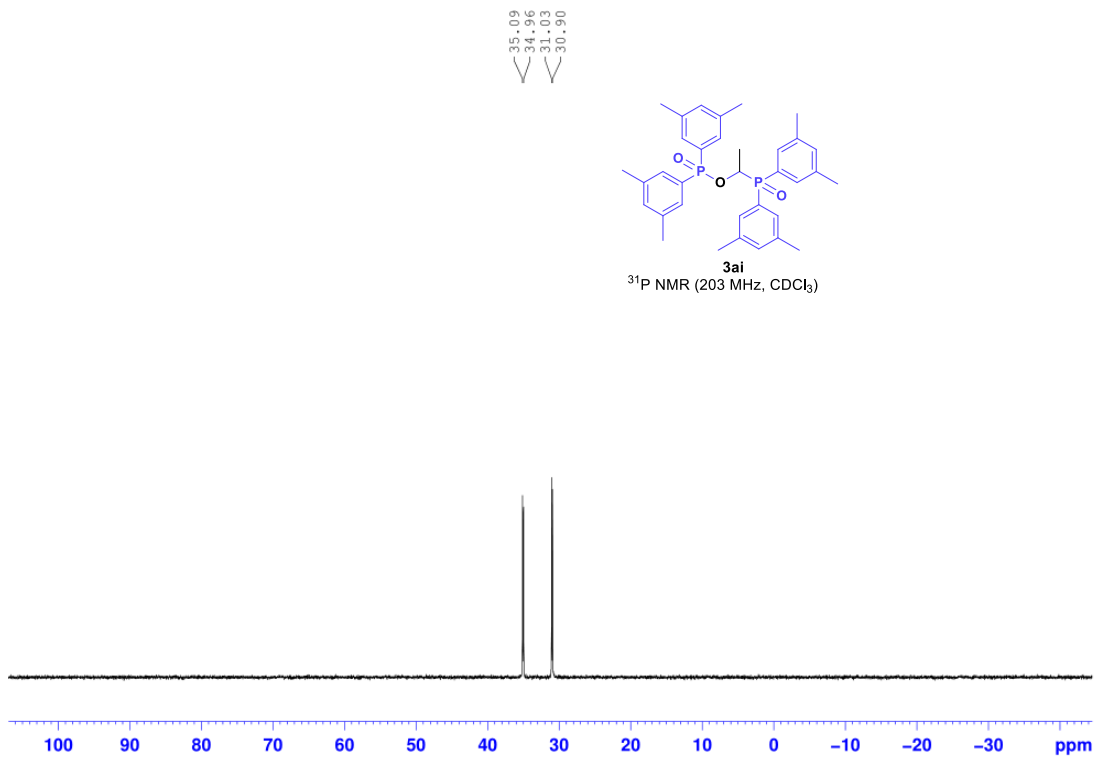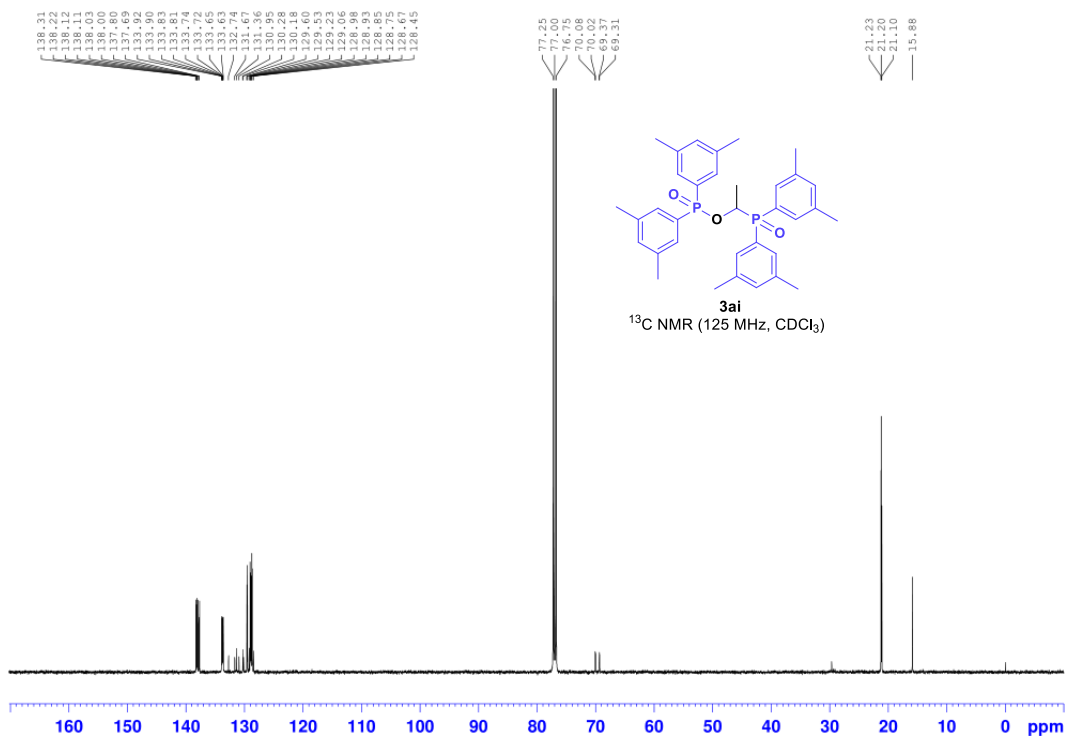



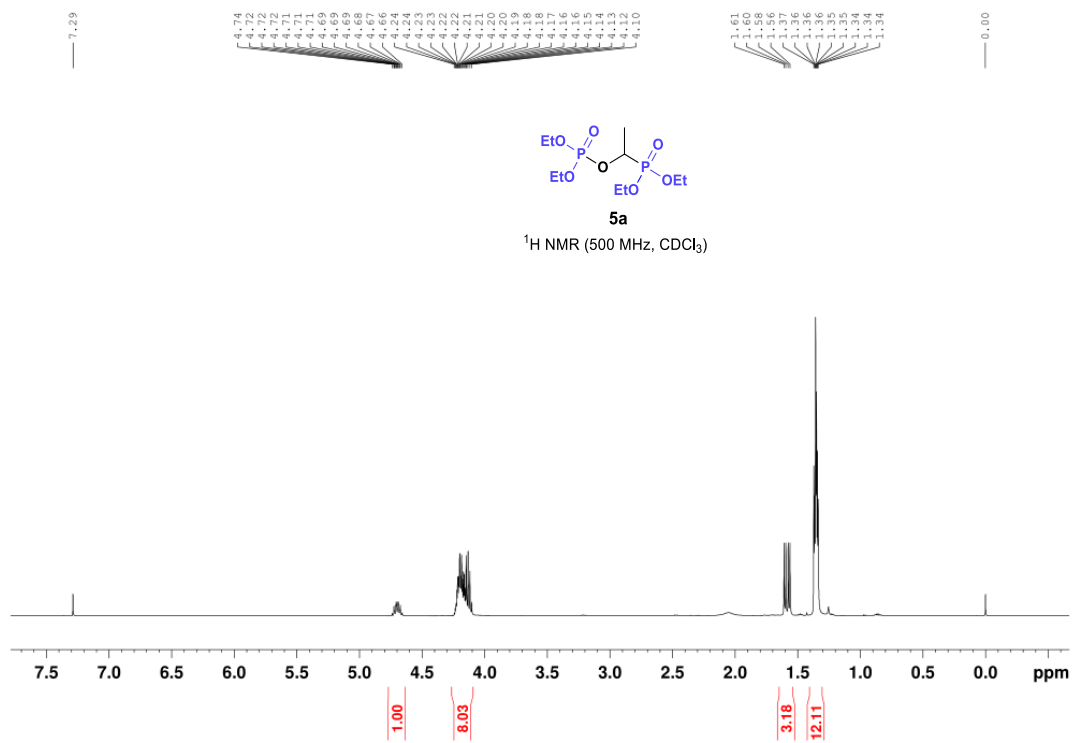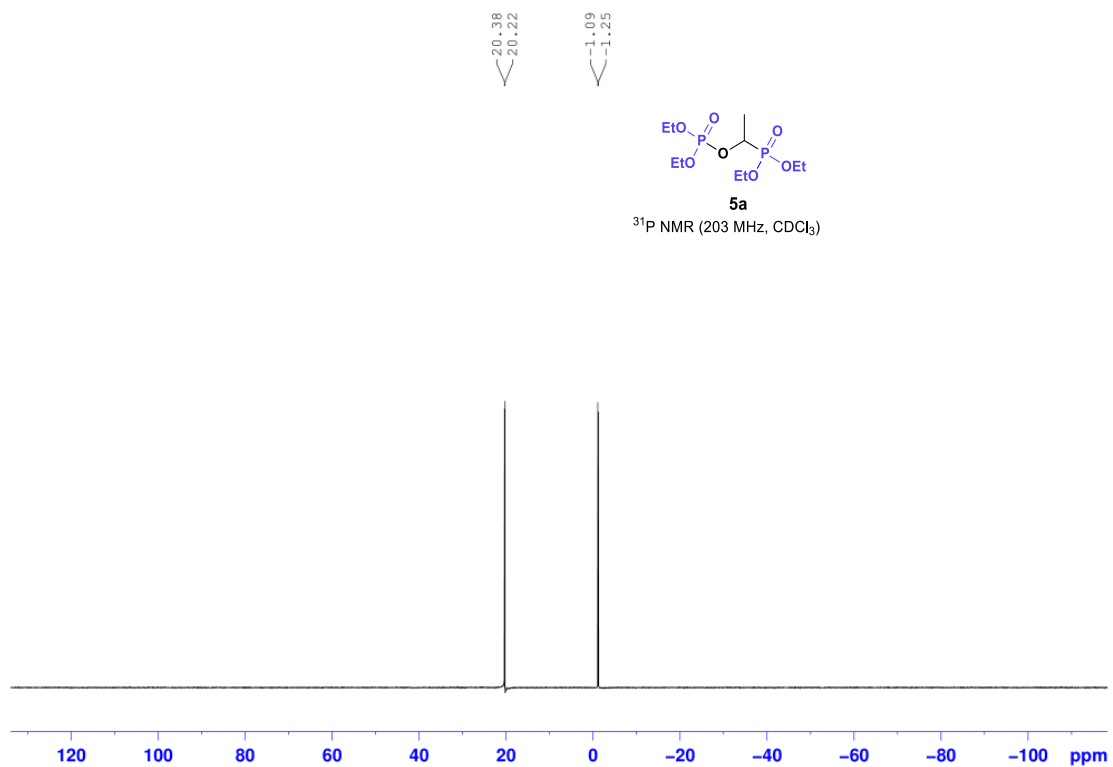

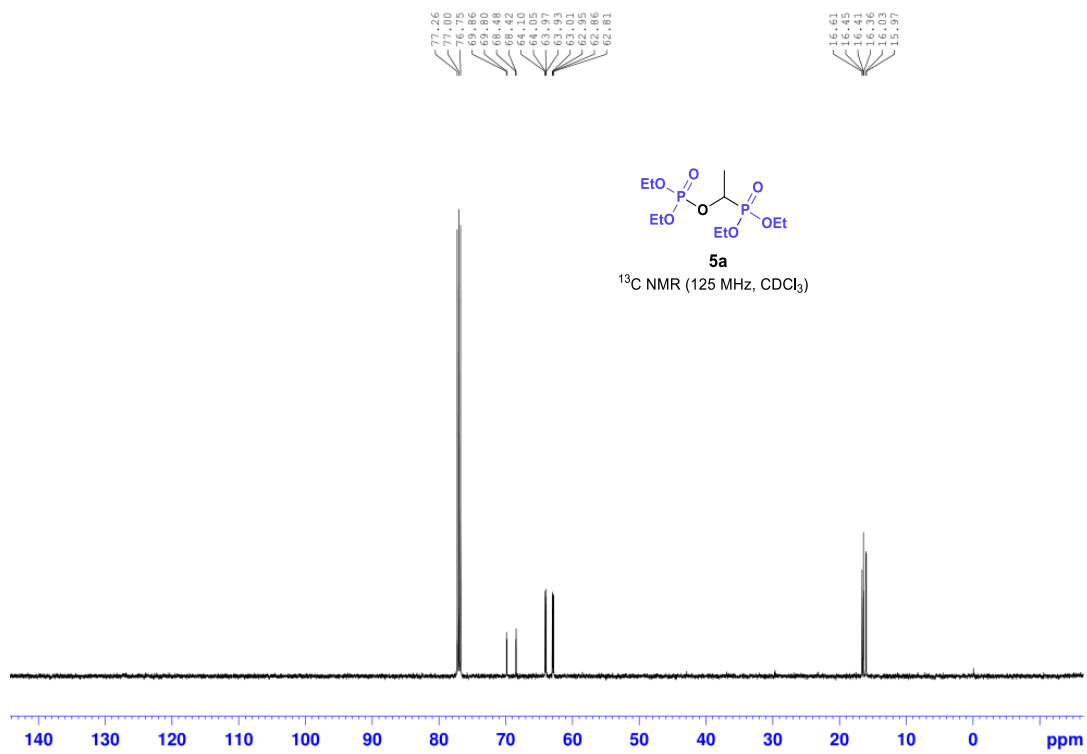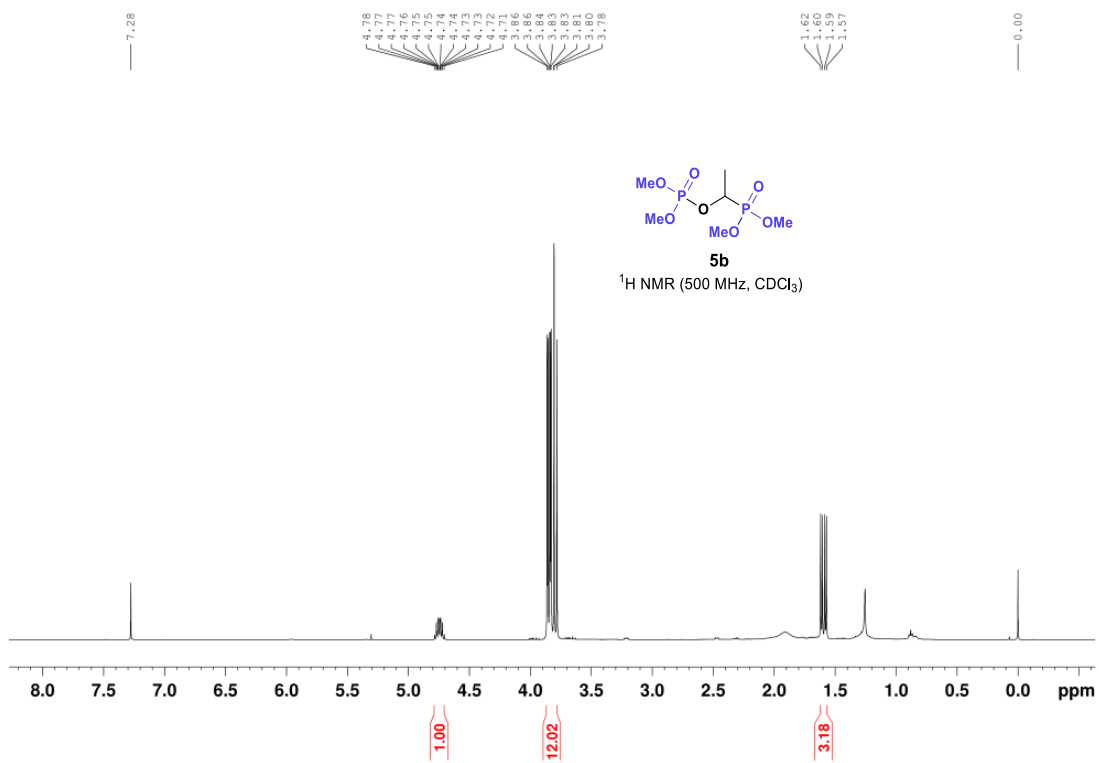

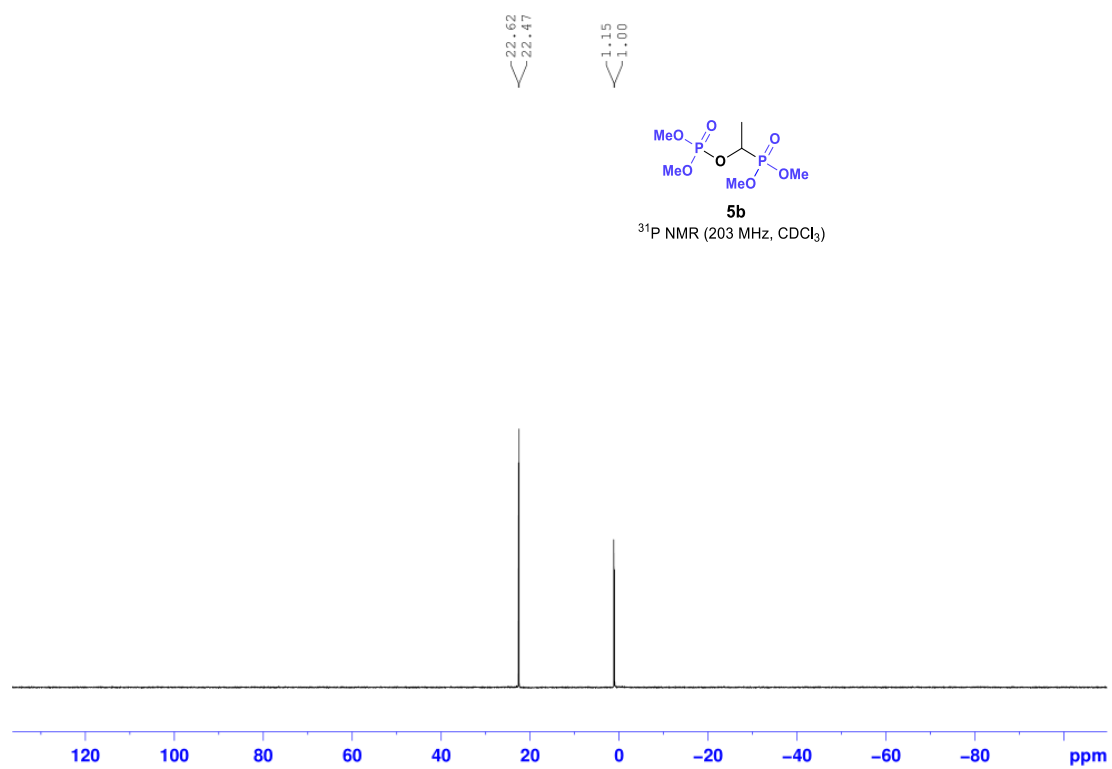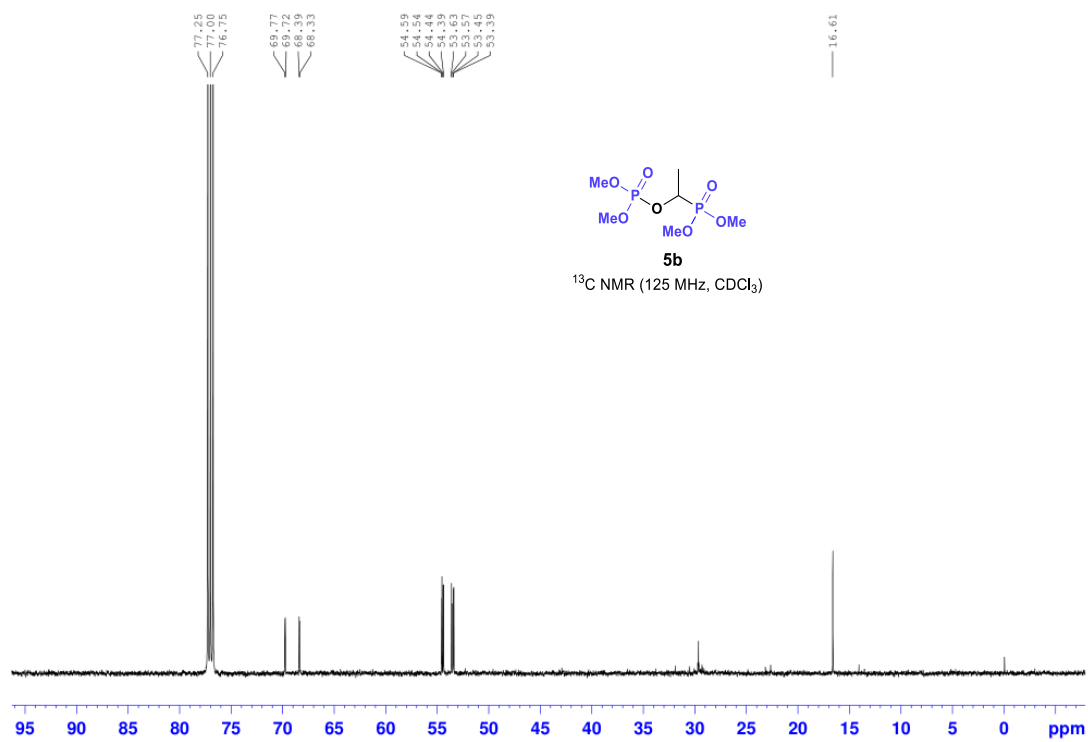

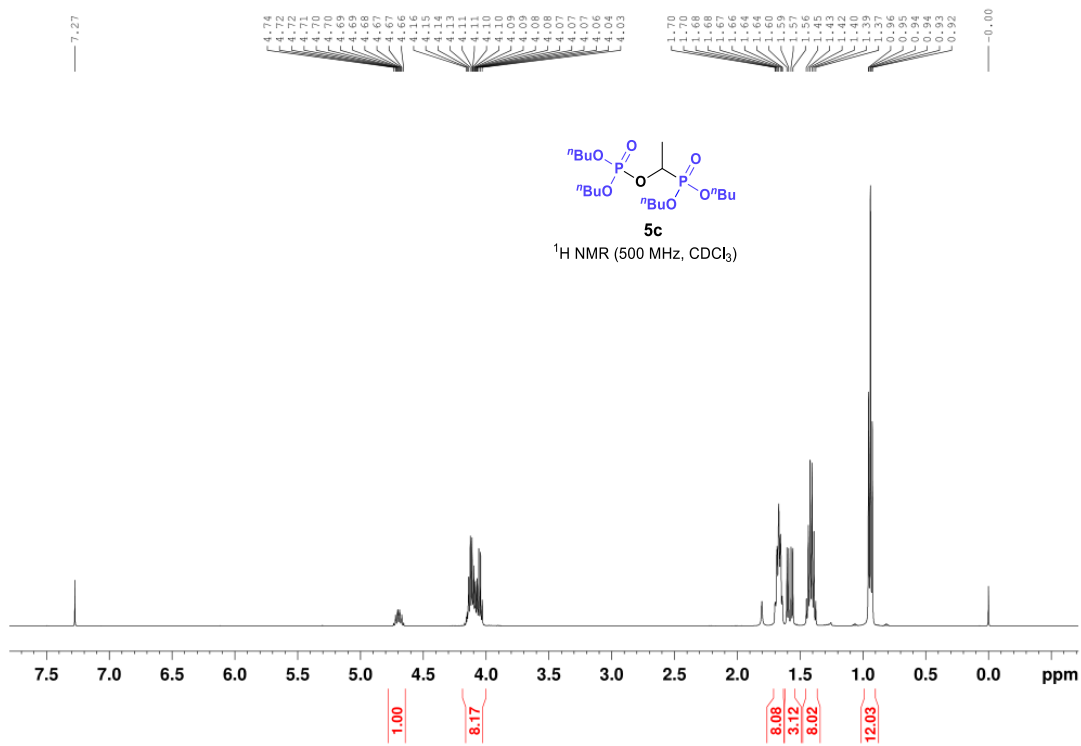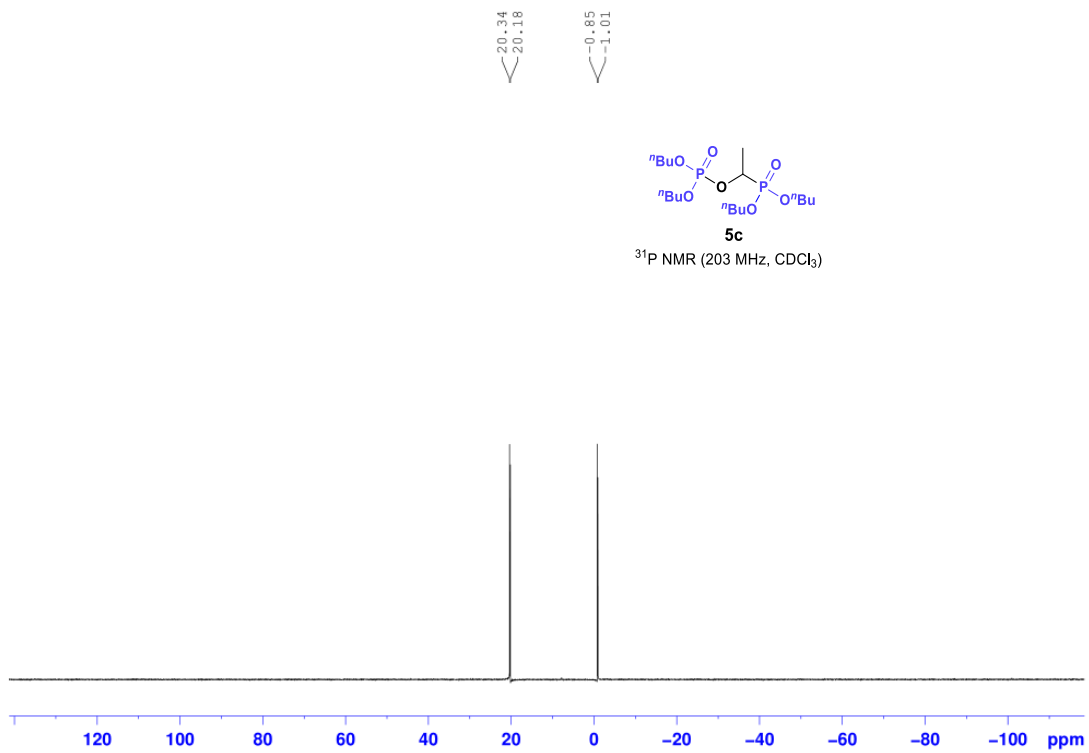

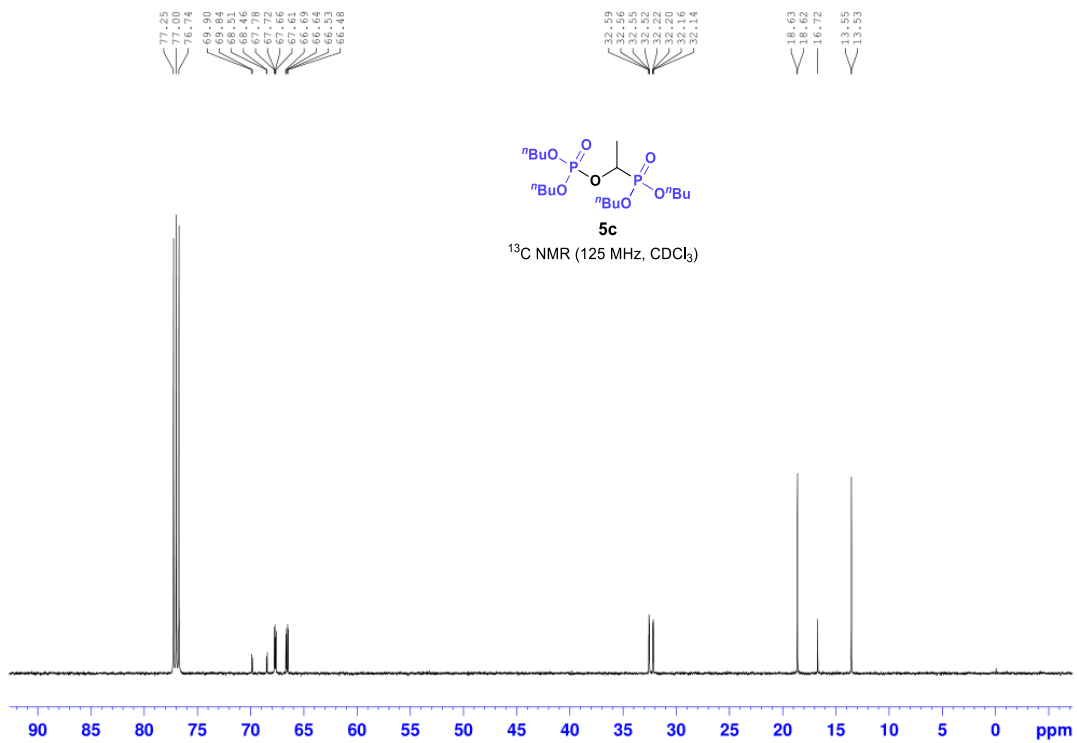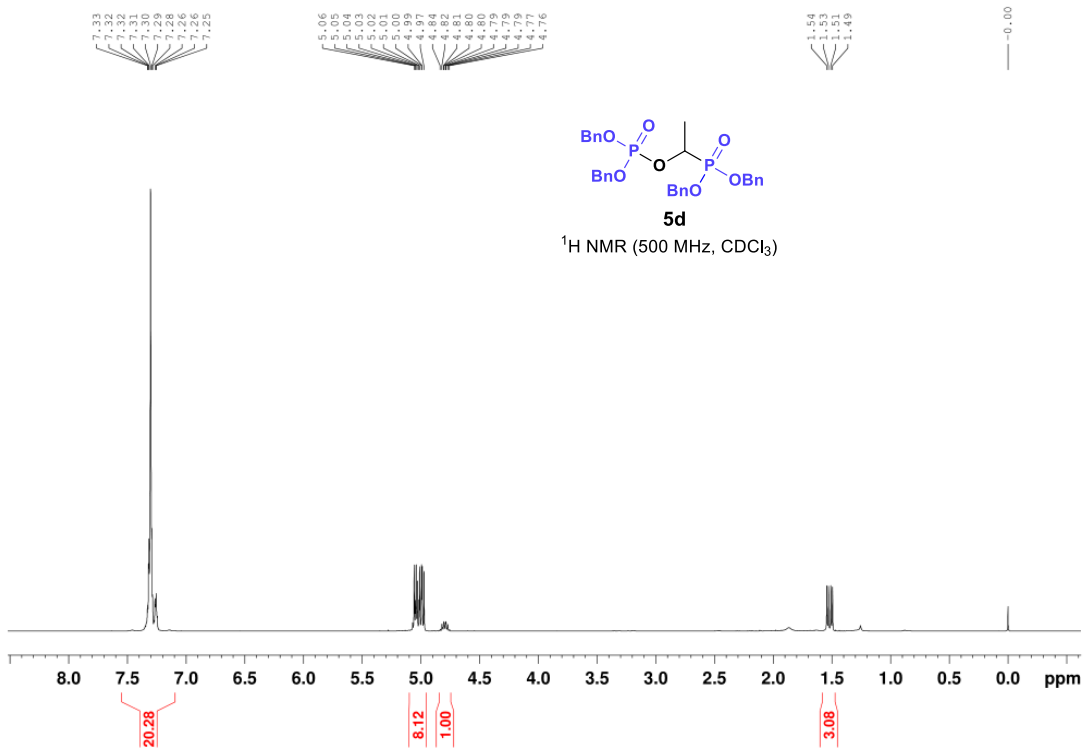

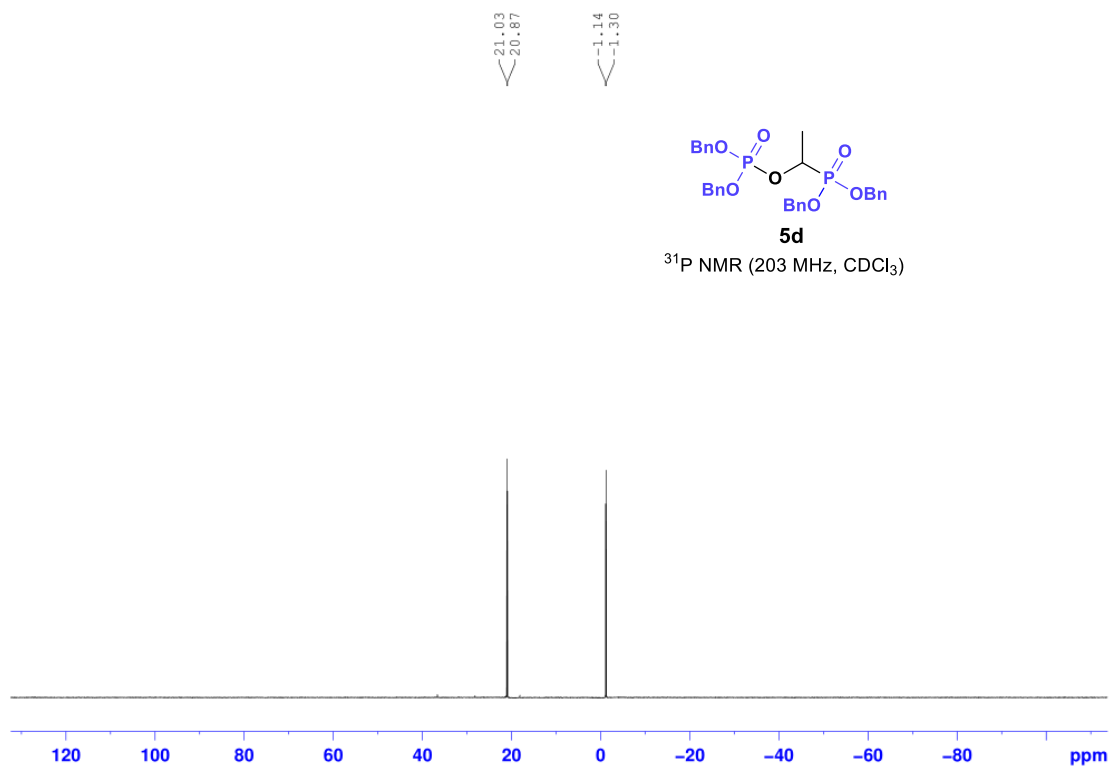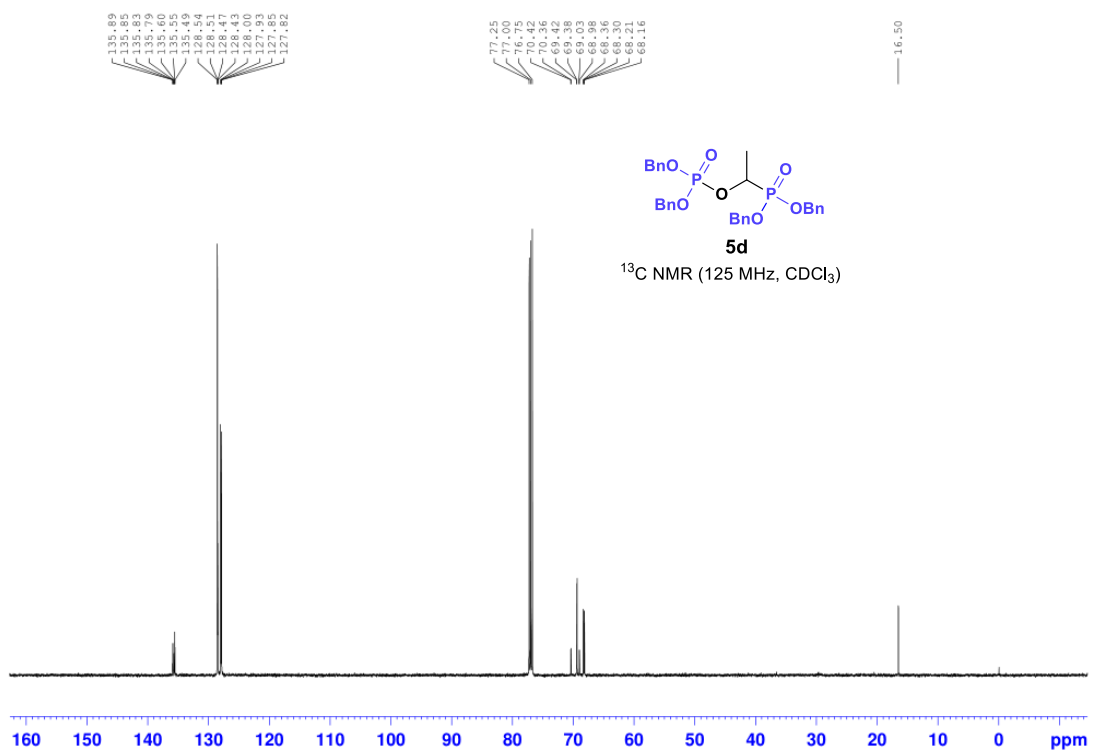

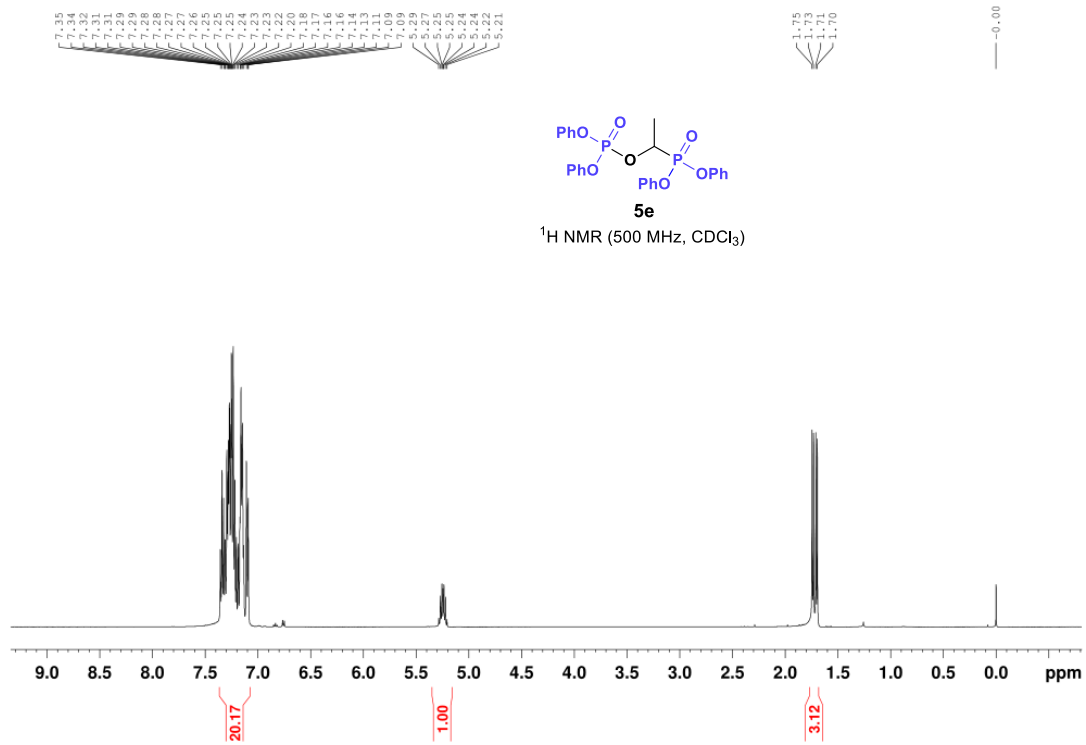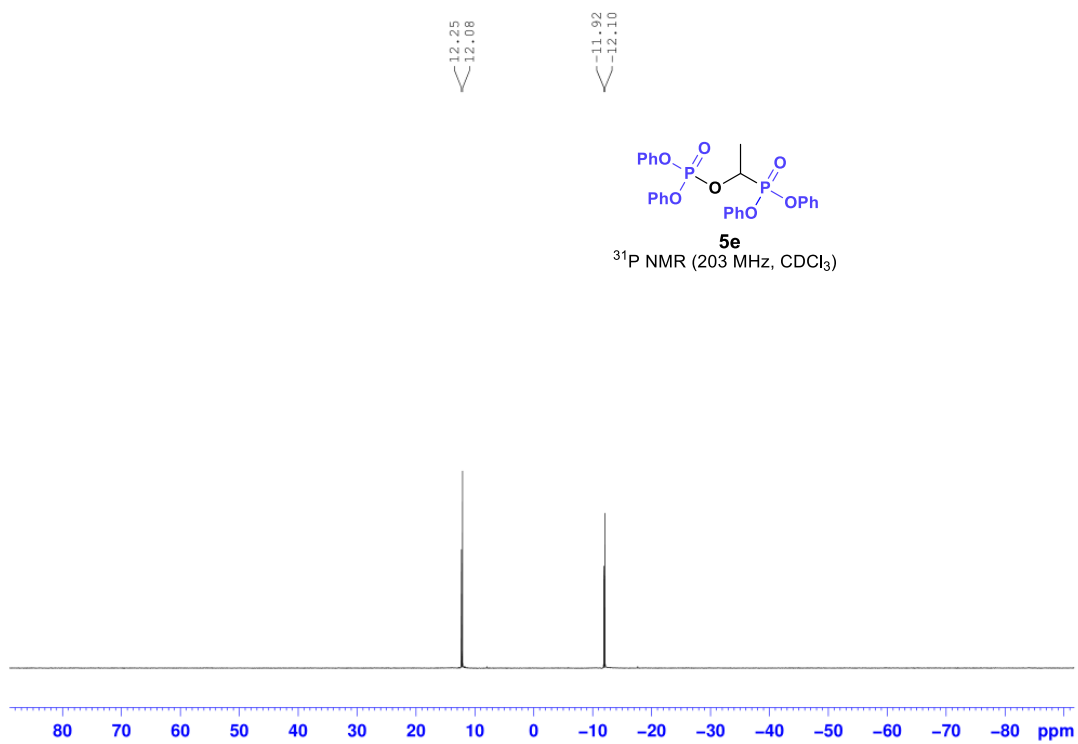

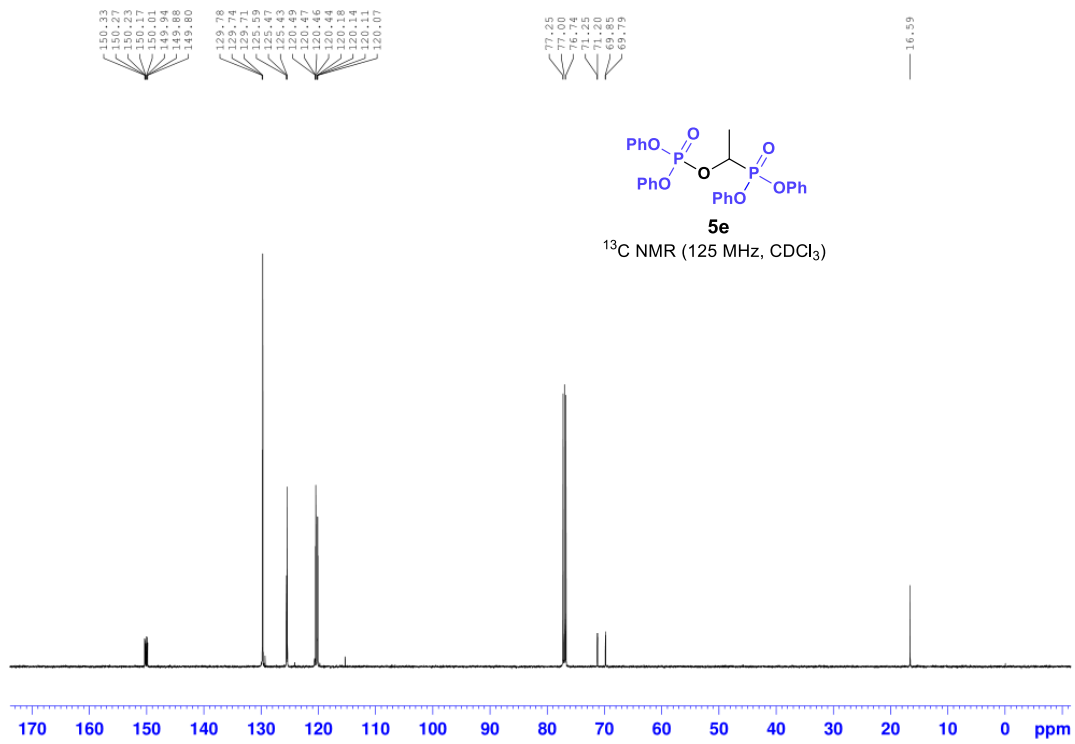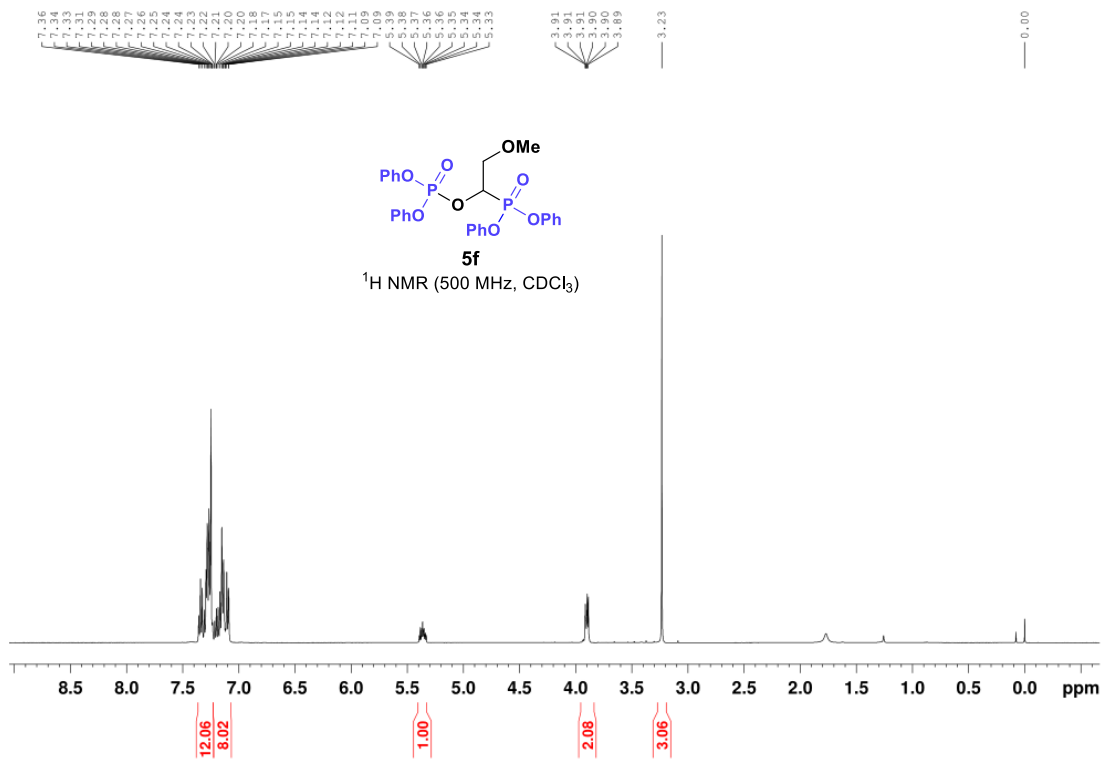



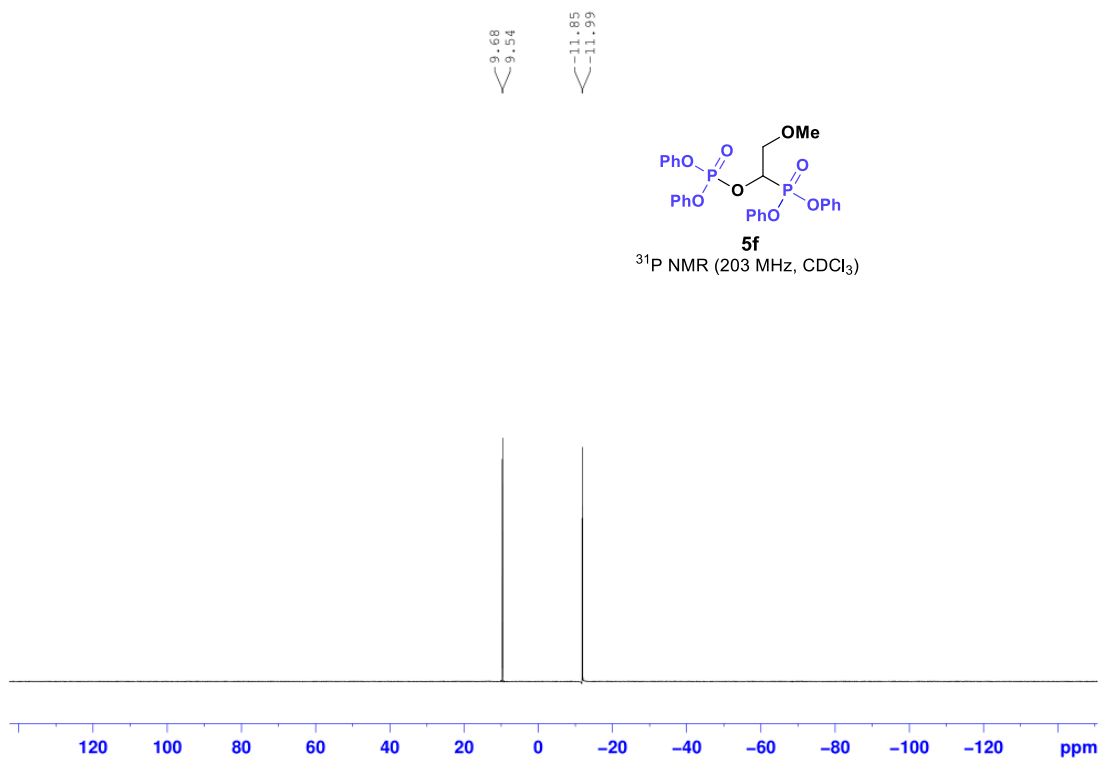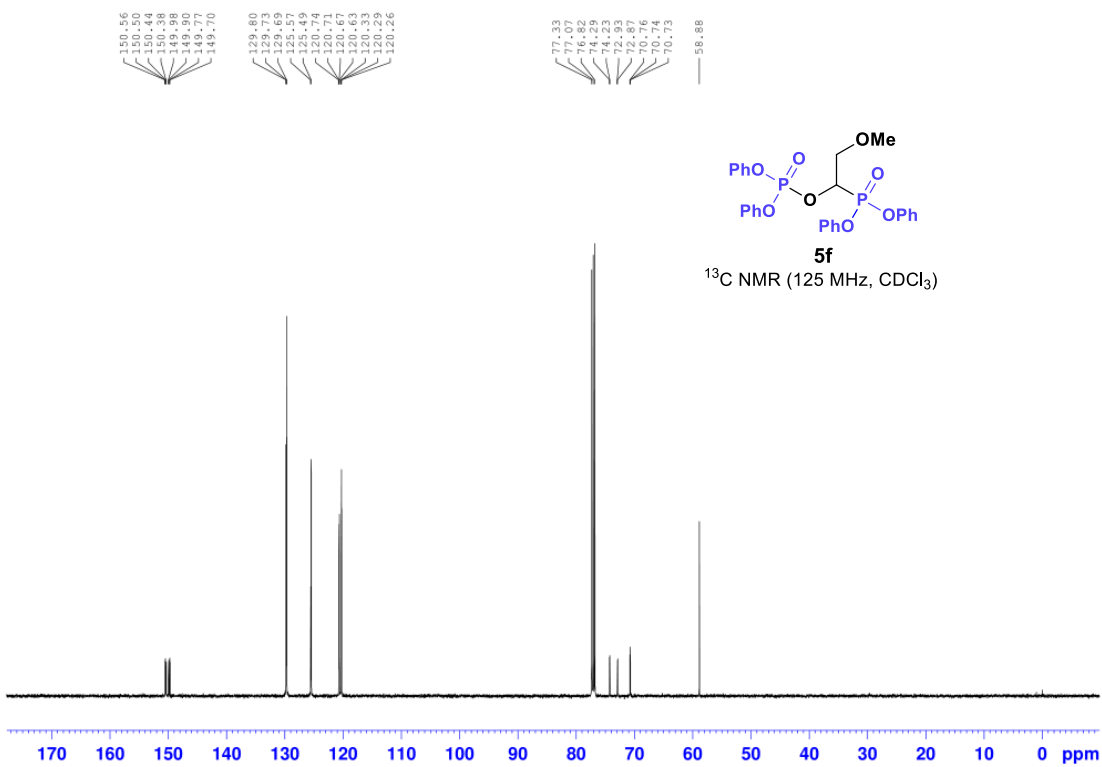



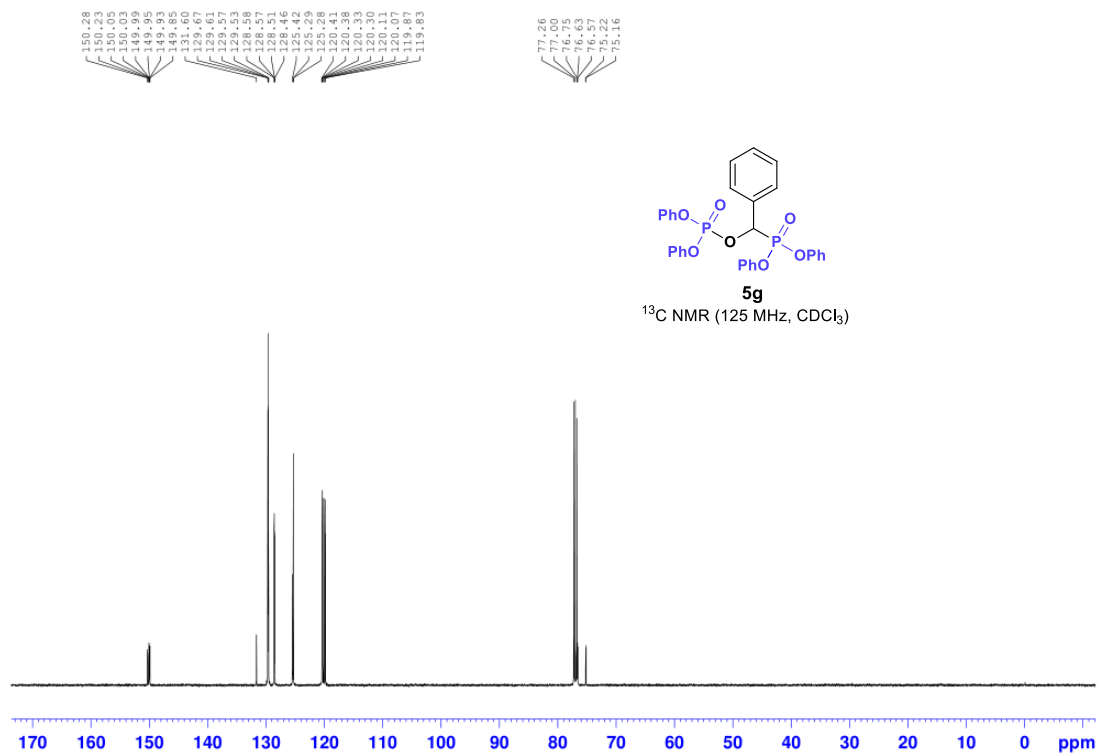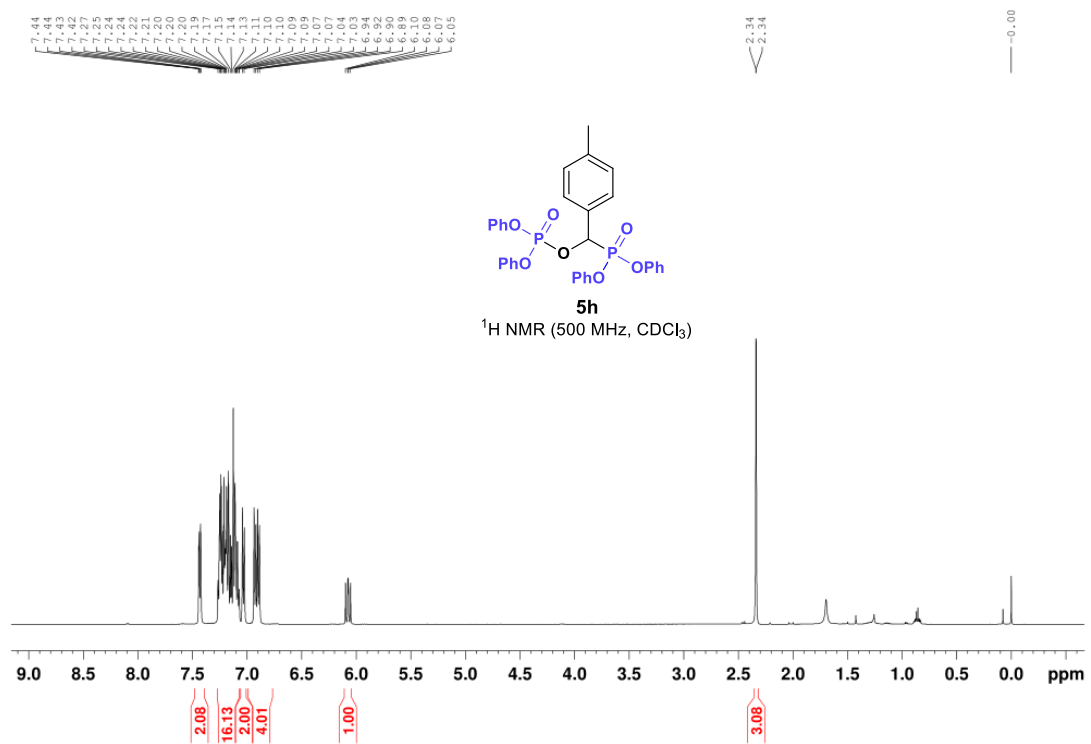



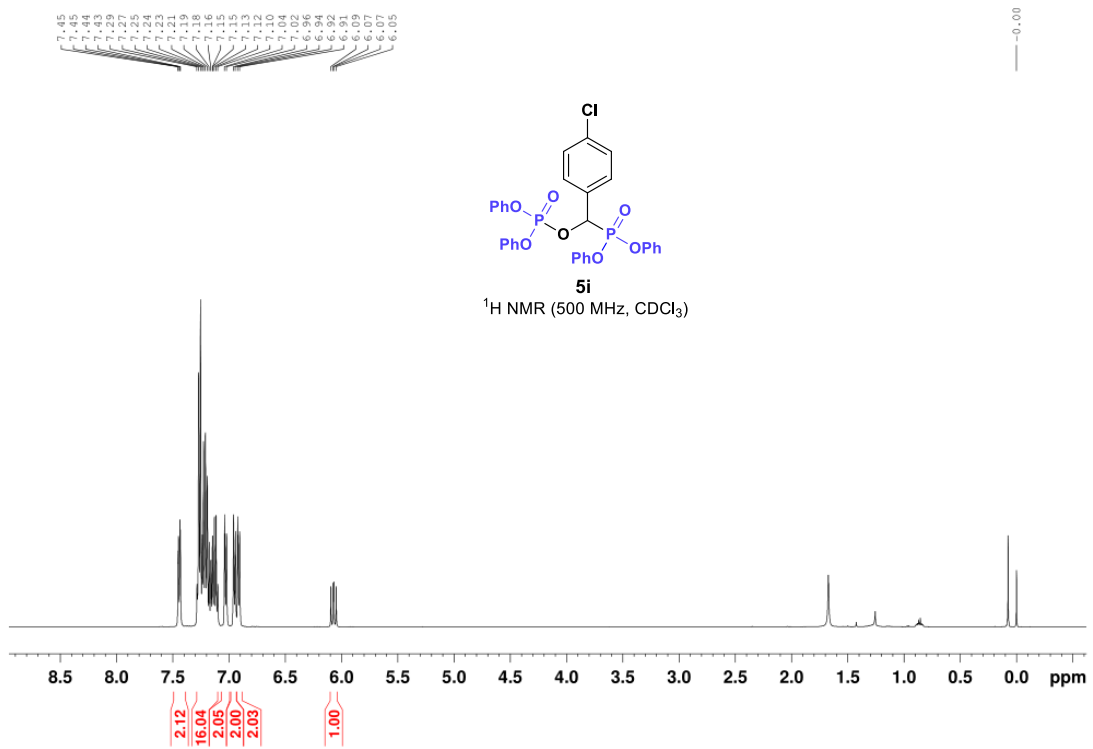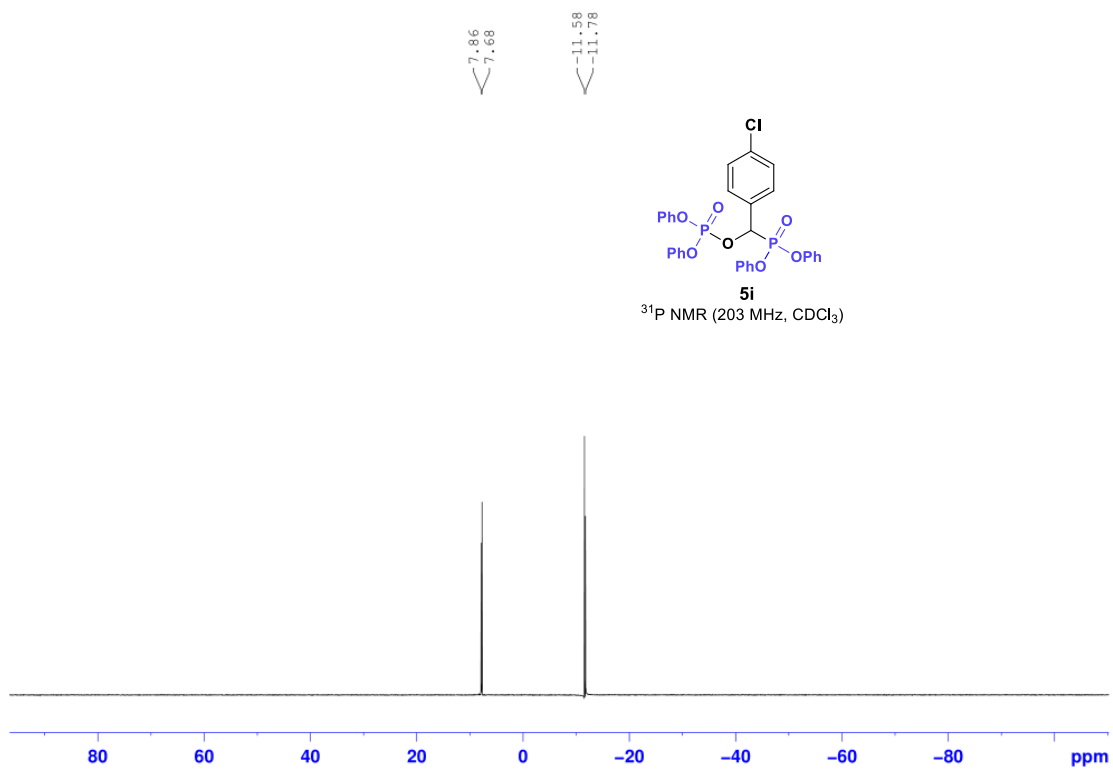



33.70  
33.60  
30.72  
30.62

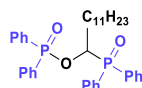

**3r**

$^{31}\text{P}$  NMR (203 MHz,  $\text{CDCl}_3$ )

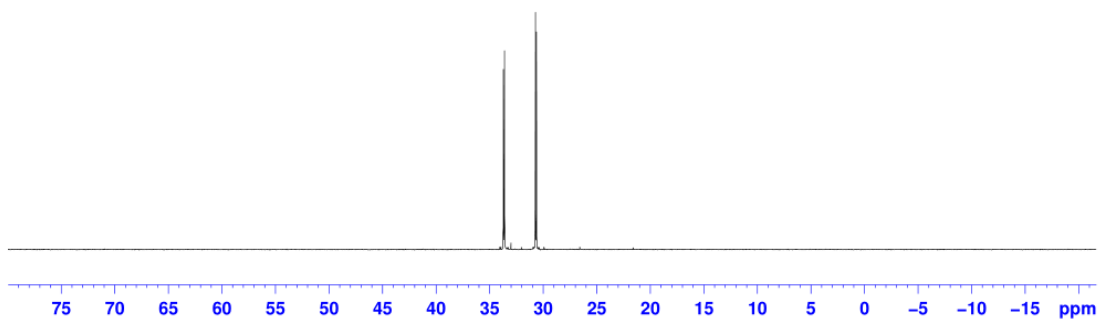

132.60  
132.51  
132.11  
132.07  
132.05  
132.01  
131.96  
131.89  
131.87  
131.73  
131.66  
131.64  
131.58  
131.52  
131.33  
131.20  
131.26  
131.26  
130.92  
130.65  
129.23  
128.95  
128.56  
128.39  
128.29  
128.03  
128.02

77.26  
77.06  
76.75  
74.18  
74.11  
73.11  
73.41

31.82  
30.44  
29.46  
29.45  
29.19  
28.99  
28.92  
28.79  
22.59  
14.04

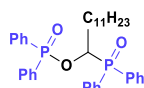

**3r**

$^{13}\text{C}$  NMR (125 MHz,  $\text{CDCl}_3$ )

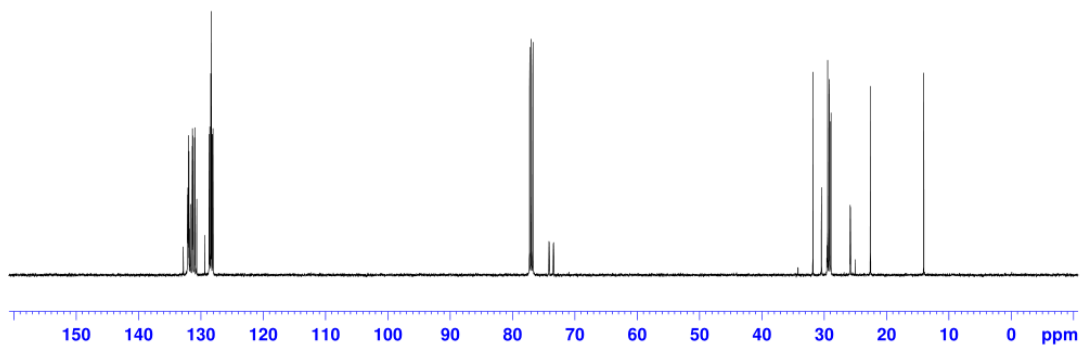

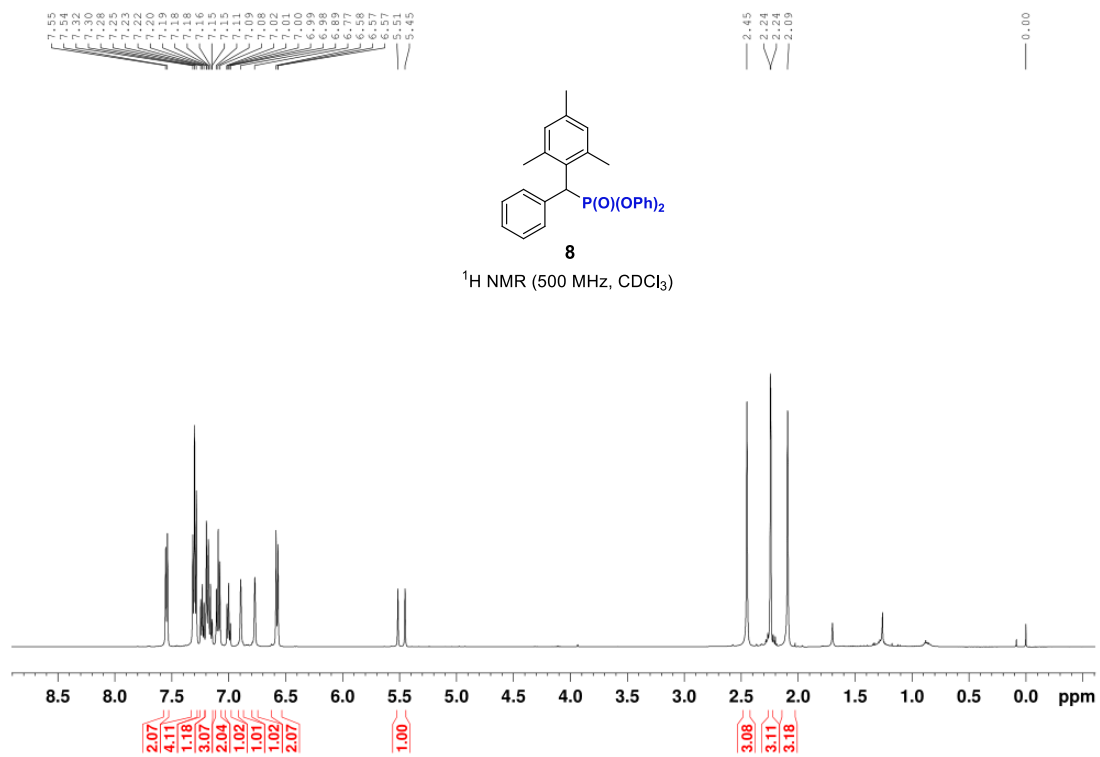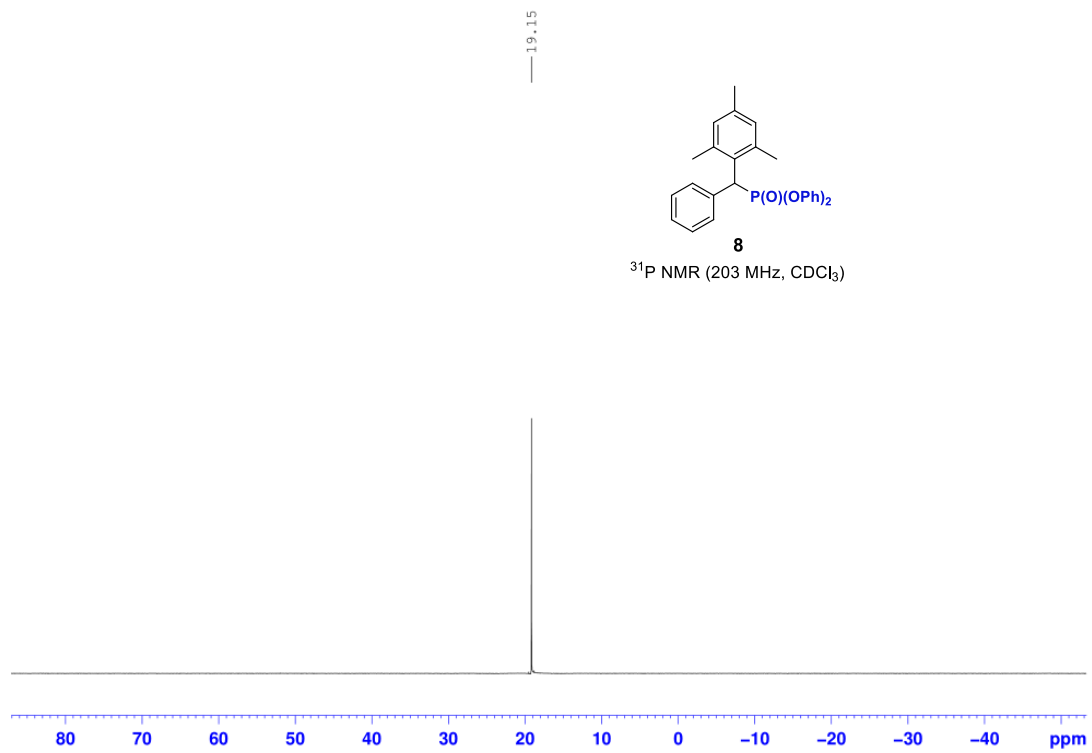



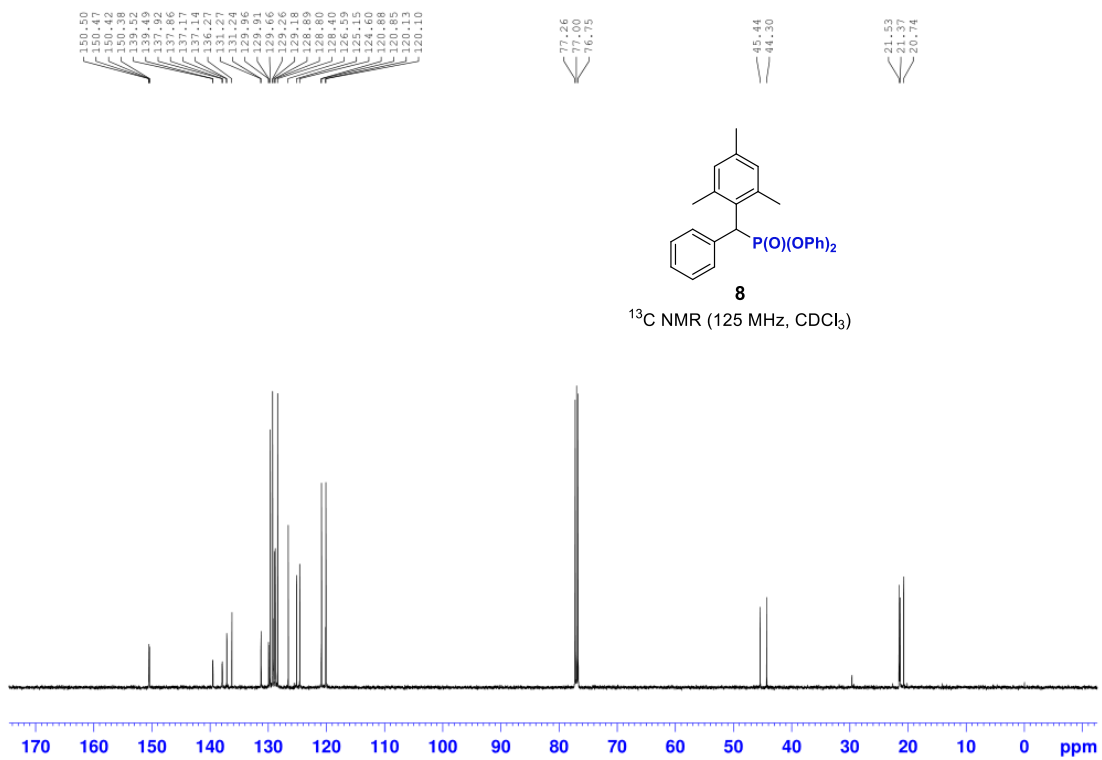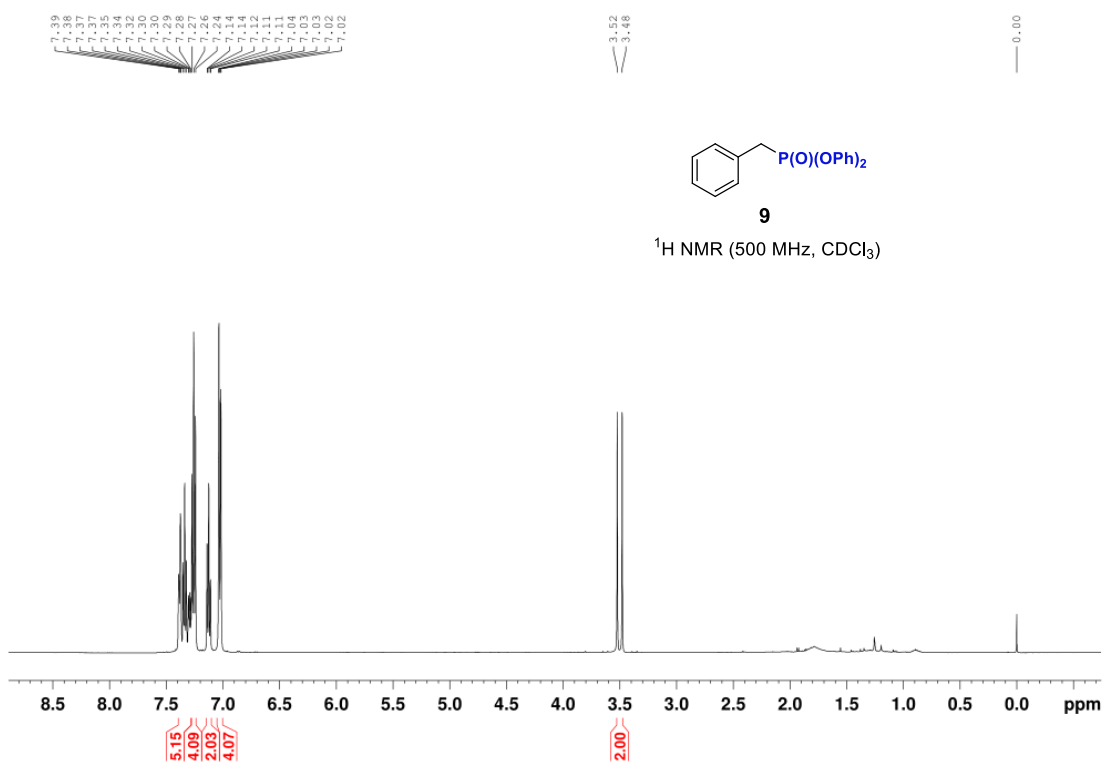

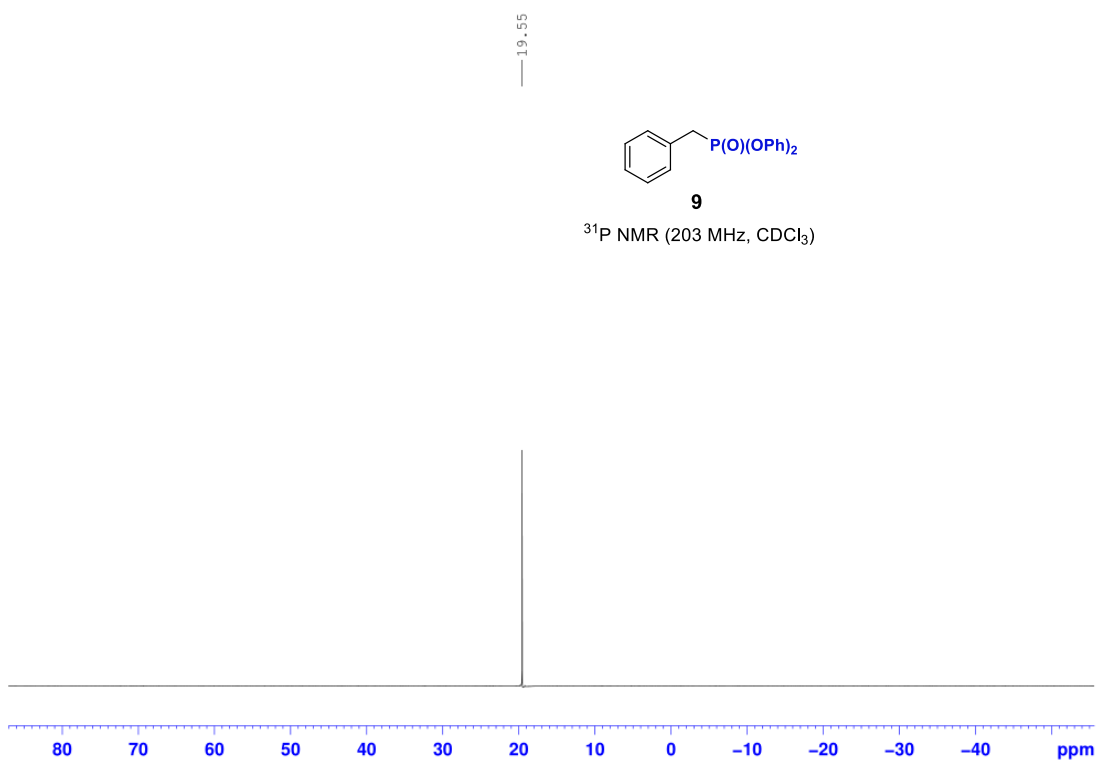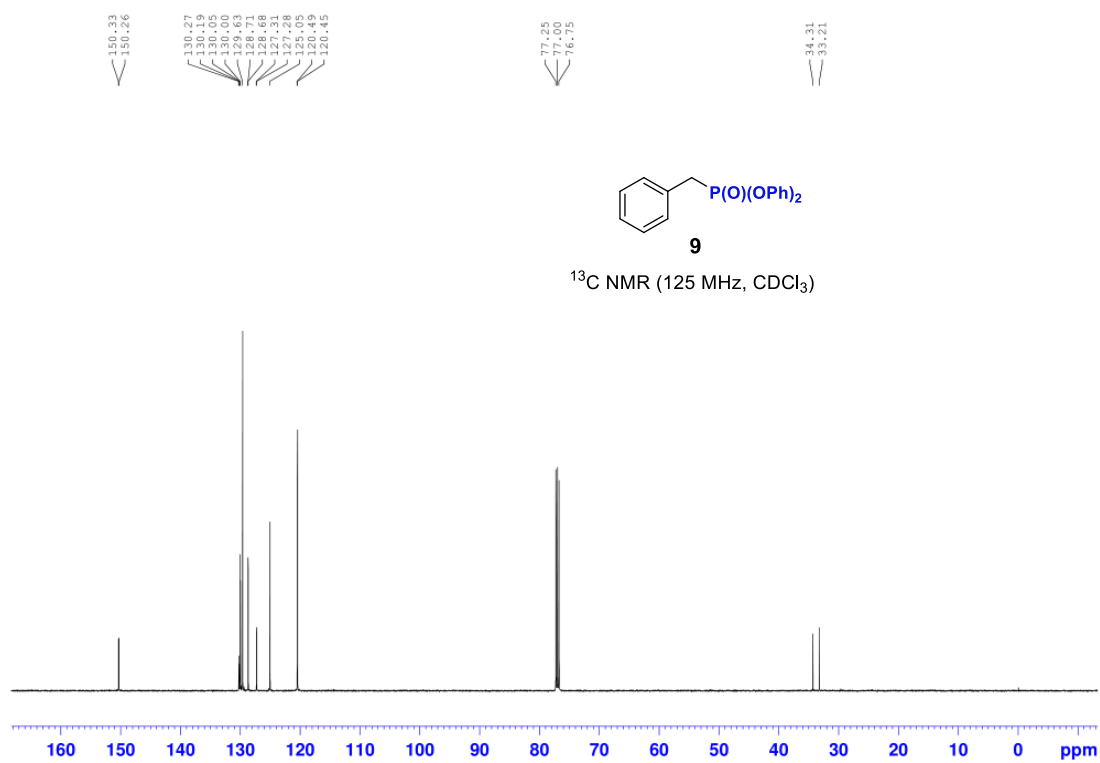

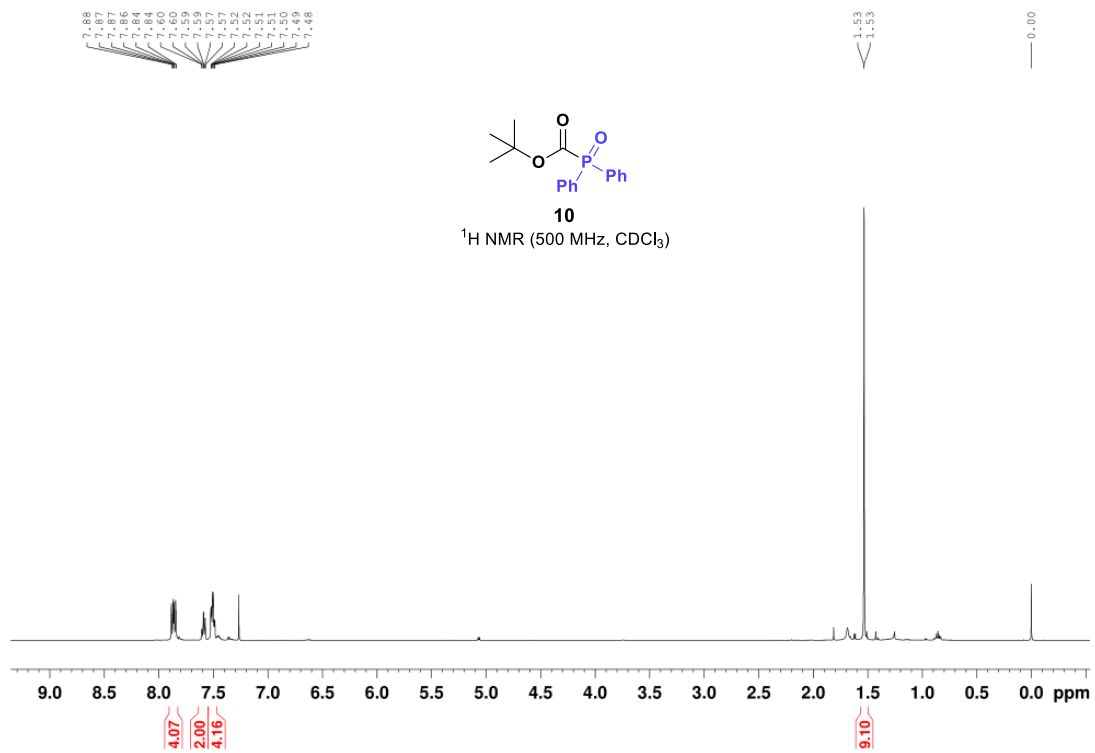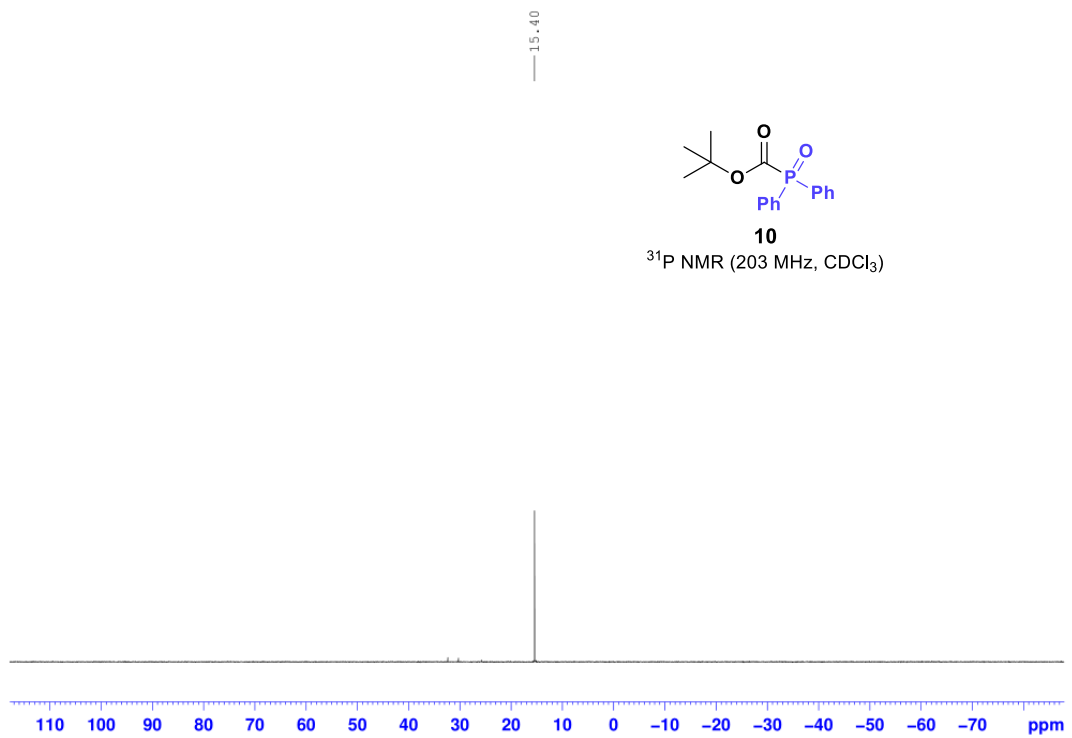

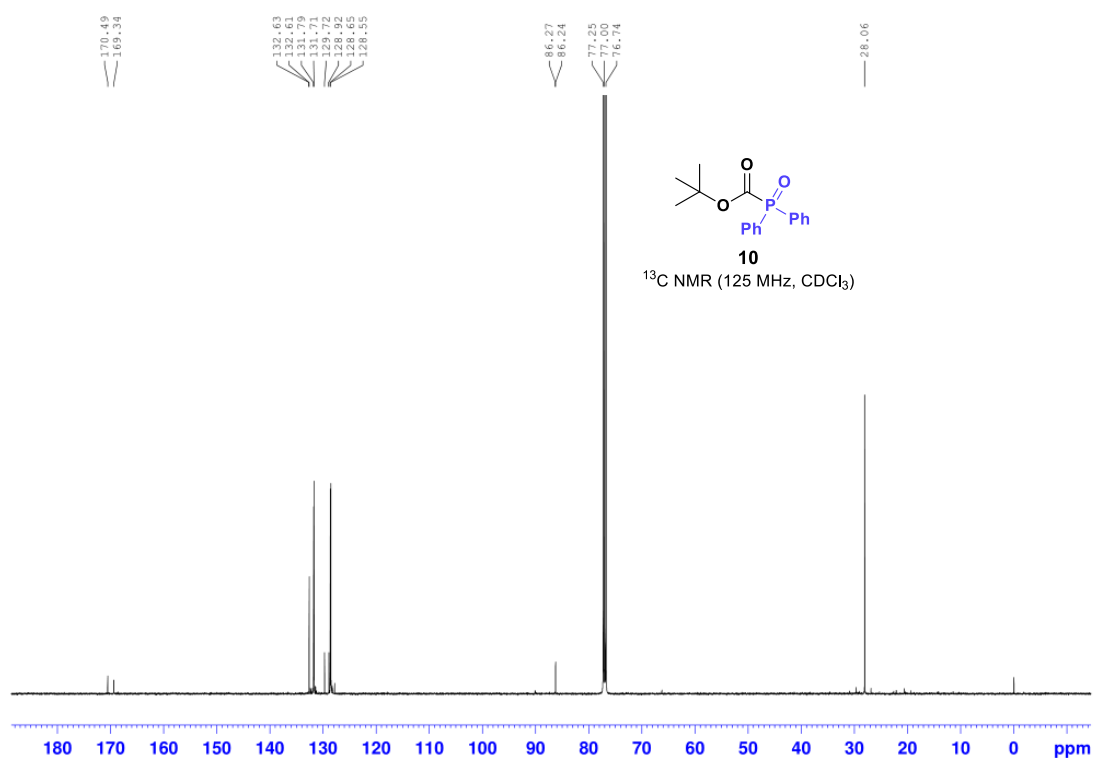

Supplement: d2cc01472f1.pdf [file d2cc01472f1.pdf]
